# Supplementary material
Source: PubMed Central journal article supplement (PMC1855367)
Supplement: pnas_0610295104_5.pdf [file pnas_0610295104_5.pdf]

**Table 3. [CpRe(CO)<sub>2</sub>](heptane)/(pentane) binding energies (kcal/mol) for various binding modes**

| <i>Pentane</i>             | <i>C1</i> | <i>C2</i> | <i>C3</i> |
|----------------------------|-----------|-----------|-----------|
| Uncorrected Binding Energy | 9.595     | 8.596     | 8.610     |
| BSSE                       | 1.755     | 2.124     | 2.019     |
|                            | 7.840     | 6.472     | 6.591     |

| <i>Heptane</i>             | <i>C1</i> | <i>C2</i> | <i>C3</i> | <i>C4</i> |
|----------------------------|-----------|-----------|-----------|-----------|
| Uncorrected Binding Energy | 9.678     | 8.826     | 8.707     | 8.695     |
| BSSE                       | 1.756     | 2.480     | 2.443     | 2.411     |
| Corrected BE               | 7.922     | 6.345     | 6.265     | 6.284     |

Calculations were performed at the B3LYP/6-31G\*, LANL2DZ level. C1 indicates a terminal carbon; C4 is the central carbon for heptane, and C3 the central carbon for pentane.
