# Supplementary material
Source: PubMed Central journal article supplement (PMC1855367)
Supplement: pnas_0610295104_6.pdf [file pnas_0610295104_6.pdf]

**Table 4.** Geometrical parameters for the optimized [CpRe(CO)<sub>2</sub>](alkane) complexes, calculated at the B3LYP/ 6-31G\*, LANL2DZ level of theory

| DFT, B3LYP   | M-H distance | M-C distance | M-H-C angle | C-H bound distance | Average C-H free distance |
|--------------|--------------|--------------|-------------|--------------------|---------------------------|
| Methane      | 2.01         | 2.75         | 119.54      | 1.13               | 1.09                      |
| Ethane       | 1.98         | 2.79         | 124.24      | 1.14               | 1.10                      |
| Propane      | 1.99         | 2.77         | 122.24      | 1.14               | 1.09                      |
| Butane       | 1.99         | 2.77         | 121.96      | 1.14               | 1.09                      |
| Pentane      | 1.97         | 2.78         | 124.59      | 1.14               | 1.09                      |
| Hexane       | 1.99         | 2.76         | 121.71      | 1.14               | 1.10                      |
| Heptane      | 1.97         | 2.76         | 122.26      | 1.14               | 1.09                      |
| Cyclopropane | 1.97         | 2.67         | 116.42      | 1.13               | 1.08                      |
| Cyclobutane  | 1.94         | 2.77         | 125.47      | 1.14               | 1.09                      |
| Cyclopentane | 1.94         | 2.80         | 128.95      | 1.14               | 1.09                      |
| Cyclohexane  | 1.96         | 2.80         | 127.22      | 1.14               | 1.09                      |

“M-H distance” and “M-C distance” are the distances between the Re atom (“M”) and the H and C atoms, respectively, of the C-H  $\sigma$ -bond that interacts most strongly with the Re atom (i.e. the C-H  $\sigma$ -bond that lies in closest proximity to the Re atom). “M-H-C angle” is the angle between the Re atom and the aforementioned C-H bond. “C-H bound distance” is the length of the aforementioned C-H bond. “Average C-H free distance” is the average length of the remaining C-H bonds that are located on the same CH<sub>3</sub> (linear alkanes)/ CH<sub>2</sub> (cyclic alkanes) group as the interacting bond (in the case of cyclic alkanes, “Average C-H free distance” is simply one bond length, not an average of two lengths).
