# Supplementary material
Source: PubMed Central journal article supplement (PMC1855367)
Supplement: pnas_0610295104_9.pdf [file pnas_0610295104_9.pdf]

**Table 7.** Geometrical parameters for the optimized [CpRe(CO)<sub>2</sub>](alkane) complexes, calculated at the RIMP2/ 6-31G\*, LANL2DZ, RIMP2-VDZ (auxiliary basis set) level of theory

|              | <b>M-H distance</b> | <b>M-C distance</b> | <b>M-H-C angle</b> | <b>C-H bound distance</b> | <b>Average C-H free distance</b> |
|--------------|---------------------|---------------------|--------------------|---------------------------|----------------------------------|
| <b>RIMP2</b> |                     |                     |                    |                           |                                  |
| Methane      | 1.96                | 2.62                | 112.87             | 1.14                      | 1.10                             |
| Ethane       | 1.92                | 2.62                | 115.24             | 1.15                      | 1.09                             |
| Propane      | 1.92                | 2.61                | 114.24             | 1.15                      | 1.09                             |
| Butane       | 1.92                | 2.61                | 114.05             | 1.15                      | 1.09                             |
| Pentane      | 1.92                | 2.61                | 114.14             | 1.15                      | 1.09                             |
| Hexane       | 1.91                | 2.61                | 114.39             | 1.15                      | 1.10                             |
| Heptane      | 1.92                | 2.61                | 114.16             | 1.15                      | 1.09                             |
| Cyclopropane | 1.92                | 2.58                | 111.53             | 1.16                      | 1.09                             |
| Cyclobutane  | 1.87                | 2.56                | 112.99             | 1.16                      | 1.09                             |
| Cyclopentane | 1.87                | 2.57                | 113.41             | 1.16                      | 1.09                             |
| Cyclohexane  | 1.89                | 2.59                | 114.30             | 1.16                      | 1.09                             |

“M-H distance” and “M-C distance” are the distances between the Re atom (“M”) and the H and C atoms, respectively, of the C-H  $\sigma$ -bond that interacts most strongly with the Re atom (i.e. the C-H  $\sigma$ -bond that lies in closest proximity to the Re atom). “M-H-C angle” is the angle between the Re atom and the aforementioned C-H bond. “C-H bound distance” is the length of the aforementioned C-H bond. “Average C-H free distance” is the average length of the remaining C-H bonds that are located on the same CH<sub>3</sub> (linear alkanes)/ CH<sub>2</sub> (cyclic alkanes) group as the interacting bond (in the case of cyclic alkanes, “Average C-H free distance” is simply one bond length, not an average of two lengths).
