# Supplementary material
Source: PubMed Central journal article supplement (PMC1855367)
Supplement: pnas_0610295104_10.pdf [file pnas_0610295104_10.pdf]

**Table 8.** Geometrical parameters for the optimized  $[(\text{CO})_2\text{Re}(\text{C}_5\text{H}_4)\text{C}=\text{C}(\text{C}_5\text{H}_4)\text{Re}[(\text{CO})_2]](\text{alkane})$  complexes, calculated at the B3LYP/ 6-31G\*, LANL2DZ level of theory

| <b>DFT(B3LYP)</b> | <i>Interacting</i>  |                 |                 |              | <i>C-H</i>      | <i>Average</i>  |
|-------------------|---------------------|-----------------|-----------------|--------------|-----------------|-----------------|
|                   | <i>Pair of</i>      | <i>M-H</i>      | <i>M-C</i>      | <i>M-H-C</i> | <i>bound</i>    | <i>C-H free</i> |
|                   | <i>Atoms</i>        | <i>Distance</i> | <i>distance</i> | <i>angle</i> | <i>distance</i> | <i>distance</i> |
| Methane           | Re <sub>1</sub> -C  | 1.979           | 2.740           | 120.688      | 1.138           | 1.091           |
|                   | Re <sub>2</sub> -C  |                 | 4.751           |              |                 |                 |
| Ethane            | Re <sub>1</sub> -C1 | 2.031           | 2.813           | 122.901      | 1.133           | 1.092           |
|                   | Re <sub>2</sub> -C2 | 2.016           | 2.818           | 124.552      | 1.134           | 1.091           |
| Propane           | Re <sub>1</sub> -C1 | 2.039           | 2.899           | 129.745      | 1.135           | 1.092           |
|                   | Re <sub>2</sub> -C3 | 1.988           | 2.786           | 123.795      | 1.137           | 1.092           |
| Butane            | Re <sub>1</sub> -C1 | 1.988           | 2.771           | 122.737      | 1.135           | 1.093           |
|                   | Re <sub>2</sub> -C4 | 1.993           | 2.780           | 123.256      | 1.134           | 1.093           |
| Pentane           | Re <sub>1</sub> -C1 | 1.993           | 2.850           | 129.057      | 1.138           | 1.091           |
|                   | Re <sub>2</sub> -C5 | 2.024           | 2.910           | 132.085      | 1.136           | 1.091           |
| Cyclopropane      | Re <sub>1</sub> -C1 | 2.023           | 2.818           | 124.807      | 1.122           | 1.081           |
|                   | Re <sub>2</sub> -C2 | 2.020           | 2.834           | 126.632      | 1.120           | 1.082           |
| Cyclobutane       | Re <sub>1</sub> -C1 | 1.94            | 2.75            | 123.90       | 1.15            | 1.090           |
| Cyclopentane      | Re <sub>1</sub> -C1 | 2.108           | 3.035           | 138.863      | 1.111           | 1.079           |
|                   | Re <sub>2</sub> -C2 | 2.107           | 3.003           | 135.668      | 1.110           | 1.078           |

“M-H distance” and “M-C distance” are the distances between the designated Re atom (“M” = Re<sub>1</sub> or Re<sub>2</sub>) and the H and C atoms, respectively, of the C-H  $\sigma$ -bond that interacts most strongly with that particular Re atom (i.e. the C-H  $\sigma$ -bond that lies in closest proximity to that Re atom). The designations “C1”, “C2”, etc. indicate the position along the alkane chain / ring of the CH<sub>3</sub> / CH<sub>2</sub> group that is interacting with the designated Re atom. “M-H-C angle” is the angle between the Re atom and the aforementioned C-H bond. “C-H bound distance” is the length of the aforementioned C-H bond. “Average C-H free distance” is the average length of the remaining C-H bonds that are located on the same CH<sub>3</sub> (linear alkanes)/ CH<sub>2</sub> (cyclic alkanes) group as the interacting bond (in the case of cyclic alkanes, “Average C-H free distance” is simply one bond length, not an average of two lengths).
