# Supplementary material
Source: PubMed Central journal article supplement (PMC1855367)
Supplement: pnas_0610295104_11.pdf [file pnas_0610295104_11.pdf]

**Table 9.** Geometrical parameters for the optimized  $[(\text{CO})_2\text{Re}(\text{C}_5\text{H}_4)\text{C}\equiv\text{C}(\text{C}_5\text{H}_4)\text{Re}[(\text{CO})_2](\text{alkane})$  complexes, calculated at the BP86/ 6-31G\*, LANL2DZ level of theory

| <b>DFT(BP86)</b> | <i>Interacting</i>  |                 |                 |              | <i>C-H</i>      | <i>Average</i>  |
|------------------|---------------------|-----------------|-----------------|--------------|-----------------|-----------------|
|                  | <i>Pair of</i>      | <i>M-H</i>      | <i>M-C</i>      | <i>M-H-C</i> | <i>bound</i>    | <i>C-H free</i> |
|                  | <i>Atoms</i>        | <i>Distance</i> | <i>distance</i> | <i>angle</i> | <i>distance</i> | <i>distance</i> |
| Methane          | Re <sub>1</sub> -C  | 1.946           | 2.634           | 113.303      | 1.164           | 1.100           |
|                  | Re <sub>2</sub> -C  |                 | 4.119           |              |                 |                 |
| Ethane           | Re <sub>1</sub> -C1 | 1.973           | 2.745           | 120.500      | 1.154           | 1.101           |
|                  | Re <sub>2</sub> -C2 | 1.975           | 2.747           | 120.412      | 1.156           | 1.100           |
| Propane          | Re <sub>1</sub> -C1 | 1.952           | 2.716           | 119.456      | 1.159           | 1.102           |
|                  | Re <sub>2</sub> -C3 | 1.995           | 2.829           | 125.554      | 1.156           | 1.101           |
| Butane           | Re <sub>1</sub> -C1 | 1.951           | 2.718           | 119.872      | 1.155           | 1.103           |
|                  | Re <sub>2</sub> -C4 | 1.958           | 2.731           | 120.557      | 1.153           | 1.102           |
| Pentane          | Re <sub>1</sub> -C1 | 1.965           | 2.792           | 124.766      | 1.158           | 1.100           |
|                  | Re <sub>2</sub> -C5 | 1.985           | 2.870           | 130.260      | 1.154           | 1.099           |
| Cyclopropane     | Re <sub>1</sub> -C1 | 1.979           | 2.671           | 114.669      | 1.148           | 1.090           |
|                  | Re <sub>2</sub> -C2 | 1.987           | 2.710           | 117.514      | 1.141           | 1.090           |
| Cyclobutane      | Re <sub>1</sub> -C1 | 1.88            | 2.66            | 119.44       | 1.17            | 1.101           |
| Cyclopentane     | Re <sub>1</sub> -C1 | 1.939           | 2.838           | 130.372      | 1.167           | 1.098           |
|                  | Re <sub>2</sub> -C2 | 1.972           | 2.754           | 120.861      | 1.161           | 1.100           |
| Cyclohexane      | Re <sub>1</sub> -C1 | 2.01            | 3.01            | 141.605      | 1.162           | 1.102           |
|                  | Re <sub>2</sub> -C2 | 2.14            | 2.91            | 121.013      | 1.146           | 1.104           |

“M-H distance” and “M-C distance” are the distances between the designated Re atom (“M” = Re<sub>1</sub> or Re<sub>2</sub>) and the H and C atoms, respectively, of the C-H  $\sigma$ -bond that interacts most strongly with that particular Re atom (i.e. the C-H  $\sigma$ -bond that lies in closest proximity to that Re atom). The designations “C1”, “C2”, etc. indicate the position along the alkane chain / ring of the CH<sub>3</sub> / CH<sub>2</sub> group that is interacting with the designated Re atom. “M-H-C angle” is the angle between the Re atom and the aforementioned C-H bond. “C-H bound distance” is the length of the aforementioned C-H bond. “Average C-H free distance” is the average length of the remaining C-H bonds that are located on the same CH<sub>3</sub> (linear alkanes)/ CH<sub>2</sub> (cyclic alkanes) group as the interacting bond (in the case of cyclic alkanes, “Average C-H free distance” is simply one bond length, not an average of two lengths).
