# Supplementary material
Source: PubMed Central journal article supplement (PMC1855367)
Supplement: pnas_0610295104_12.pdf [file pnas_0610295104_12.pdf]

**Table 10.** Table 10. Geometrical parameters for the optimized

$[(\text{CO})_2\text{Re}(\text{C}_5\text{H}_4)\text{C}\equiv\text{C}(\text{C}_5\text{H}_4)\text{Re}[(\text{CO})_2](\text{alkane})$  complexes, calculated at the SOS-MP2/ 6-31G\*,

LANL2DZ, RIMP2-VDZ (auxiliary basis set) level of theory

| <b>SOS-MP2</b> | <i>Interacting</i>  |                 |                 |              | <i>C-H</i>      | <i>Average</i>  |
|----------------|---------------------|-----------------|-----------------|--------------|-----------------|-----------------|
|                | <i>Pair of</i>      | <i>M-H</i>      | <i>M-C</i>      | <i>M-H-C</i> | <i>bound</i>    | <i>C-H free</i> |
|                | <i>Atoms</i>        | <i>Distance</i> | <i>distance</i> | <i>angle</i> | <i>distance</i> | <i>Distance</i> |
| Methane        | Re <sub>1</sub> -C  | 2.032           | 2.738           | 116.727      | 1.137           | 1.087           |
|                | Re <sub>2</sub> -C  | 2.026           | 2.728           | 116.278      | 1.137           | 1.087           |
| Ethane         | Re <sub>1</sub> -C1 | 1.985           | 2.736           | 120.044      | 1.136           | 1.092           |
|                | Re <sub>2</sub> -C2 | 1.988           | 2.722           | 118.743      | 1.135           | 1.092           |
| Butane         | Re <sub>1</sub> -C1 | 1.991           | 2.692           | 116.293      | 1.135           | 1.094           |
|                | Re <sub>2</sub> -C4 | 1.994           | 2.690           | 115.797      | 1.135           | 1.094           |
| Pentane        | Re <sub>1</sub> -C1 | 1.941           | 2.741           | 123.435      | 1.142           | 1.092           |
|                | Re <sub>2</sub> -C5 | 1.950           | 2.809           | 129.249      | 1.135           | 1.092           |

“M-H distance” and “M-C distance” are the distances between the designated Re atom (“M” = Re<sub>1</sub> or Re<sub>2</sub>) and the H and C atoms, respectively, of the C-H  $\sigma$ -bond that interacts most strongly with that particular Re atom (i.e. the C-H  $\sigma$ -bond that lies in closest proximity to that Re atom). The designations “C1”, “C2”, etc. indicate the position along the alkane chain / ring of the CH<sub>3</sub> / CH<sub>2</sub> group that is interacting with the designated Re atom. “M-H-C angle” is the angle between the Re atom and the aforementioned C-H bond. “C-H bound distance” is the length of the aforementioned C-H bond. “Average C-H free distance” is the average length of the remaining C-H bonds that are located on the same CH<sub>3</sub> (linear alkanes)/ CH<sub>2</sub> (cyclic alkanes) group as the interacting bond (in the case of cyclic alkanes, “Average C-H free distance” is simply one bond length, not an average of two lengths).
