# Supplementary material
Source: PubMed Central journal article supplement (PMC1855367)
Supplement: pnas_0610295104_13.pdf [file pnas_0610295104_13.pdf]

**Table 11.** Geometrical parameters for the optimized [(CO)<sub>2</sub>Re(C<sub>5</sub>H<sub>4</sub>)C≡C(C<sub>5</sub>H<sub>4</sub>)Re[(CO)<sub>2</sub>](alkane) complexes, calculated at the RIMP2/ 6-31G\*, LANL2DZ, RIMP2-VDZ (auxiliary basis set) level of theory

| <b>RIMP2</b> | <i>Interacting</i>  |                 |                 | <i>M-H-</i>  | <i>C-H</i>      | <i>Average</i>  |
|--------------|---------------------|-----------------|-----------------|--------------|-----------------|-----------------|
|              | <i>Pair of</i>      | <i>M-H</i>      | <i>M-C</i>      | <i>C</i>     | <i>bound</i>    | <i>C-H free</i> |
|              | <i>Atoms</i>        | <i>Distance</i> | <i>distance</i> | <i>angle</i> | <i>distance</i> | <i>Distance</i> |
| Methane      | Re <sub>1</sub> -C  | 1.98            | 2.62            | 111.28       | 1.15            | 1.09            |
|              | Re <sub>2</sub> -C  | 1.99            | 2.64            | 111.93       | 1.15            | 1.09            |
| Ethane       | Re <sub>1</sub> -C1 | 1.92            | 2.58            | 111.98       | 1.15            | 1.09            |
|              | Re <sub>2</sub> -C2 | 1.92            | 2.58            | 111.57       | 1.15            | 1.09            |
| Propane      | Re <sub>1</sub> -C1 | 1.91            | 2.70            | 121.88       | 1.15            | 1.09            |
|              | Re <sub>2</sub> -C3 | 1.91            | 2.57            | 111.49       | 1.15            | 1.10            |
| Butane       | Re <sub>1</sub> -C1 | 1.95            | 2.61            | 112.84       | 1.15            | 1.09            |
|              | Re <sub>2</sub> -C4 | 1.95            | 2.61            | 112.42       | 1.15            | 1.09            |
| Pentane      | Re <sub>1</sub> -C1 | 1.91            | 2.74            | 126.30       | 1.14            | 1.09            |
|              | Re <sub>2</sub> -C5 | 1.90            | 2.66            | 118.82       | 1.15            | 1.09            |
| Cyclopropane | Re <sub>1</sub> -C1 | 1.94            | 2.50            | 105.18       | 1.14            | 1.08            |
|              | Re <sub>2</sub> -C2 | 1.93            | 2.52            | 106.99       | 1.14            | 1.08            |
| Cyclopentane | Re <sub>1</sub> -C1 | 1.89            | 2.66            | 119.96       | 1.16            | 1.09            |
|              | Re <sub>2</sub> -C2 | 1.89            | 2.62            | 116.19       | 1.16            | 1.09            |
| Propane      | Re <sub>1</sub> -C1 | 1.91            | 2.70            | 121.88       | 1.15            | 1.09            |
|              | Re <sub>2</sub> -C3 | 1.91            | 2.57            | 111.49       | 1.15            | 1.10            |
| Butane       | Re <sub>1</sub> -C1 | 1.95            | 2.61            | 112.84       | 1.15            | 1.09            |
|              | Re <sub>2</sub> -C4 | 1.95            | 2.61            | 112.42       | 1.15            | 1.09            |
| Pentane      | Re <sub>1</sub> -C1 | 1.91            | 2.74            | 126.30       | 1.14            | 1.09            |
|              | Re <sub>2</sub> -C5 | 1.90            | 2.66            | 118.82       | 1.15            | 1.09            |

|              |                     |      |      |        |      |      |
|--------------|---------------------|------|------|--------|------|------|
| Cyclopropane | Re <sub>1</sub> -C1 | 1.94 | 2.50 | 105.18 | 1.14 | 1.08 |
|              | Re <sub>2</sub> -C2 | 1.93 | 2.52 | 106.99 | 1.14 | 1.08 |
| Cyclopentane | Re <sub>1</sub> -C1 | 1.89 | 2.66 | 119.96 | 1.16 | 1.09 |
|              | Re <sub>2</sub> -C2 | 1.89 | 2.62 | 116.19 | 1.16 | 1.09 |

“M-H distance” and “M-C distance” are the distances between the designated Re atom (“M” = Re<sub>1</sub> or Re<sub>2</sub>) and the H and C atoms, respectively, of the C-H  $\sigma$ -bond that interacts most strongly with that particular Re atom (i.e. the C-H  $\sigma$ -bond that lies in closest proximity to that Re atom). The designations “C1”, “C2”, etc. indicate the position along the alkane chain / ring of the CH<sub>3</sub> / CH<sub>2</sub> group that is interacting with the designated Re atom. “M-H-C angle” is the angle between the Re atom and the aforementioned C-H bond. “C-H bond distance” is the length of the aforementioned C-H bond. “Average C-H free distance” is the average length of the remaining C-H bonds that are located on the same CH<sub>3</sub> (linear alkanes)/ CH<sub>2</sub> (cyclic alkanes) group as the interacting bond (in the case of cyclic alkanes, “Average C-H free distance” is simply one bond length, not an average of two lengths).
