# Supplementary material
Source: PubMed Central journal article supplement (PMC1855367)
Supplement: pnas_0610295104_14.pdf [file pnas_0610295104_14.pdf]

## **1. Binding energies for the mononuclear and binuclear rhenium complexes complexes at the HF, DFT(B3LYP), DFT(BP86), RIMP2 and SOS-MP2 levels of theory**

Calculations were performed using QCHEM (1,2). All optimizations were performed first at the HF level, followed by a higher-level (DFT(B3LYP), DFT(BP86), RIMP2, or SOS-MP2) optimization. The 6-31G\* basis set (3) was used for all non-metal atoms and the LANL2DZ basis set and effective core potential (ECP) (4) were used for rhenium and manganese. In addition, the RIMP2-VDZ auxiliary basis set (5) was used on all atoms in the RIMP2 and SOS-MP2 calculations. Each transition metal complex-alkane interaction energy was found by optimizing three structures—the entire alkane-transition metal complex, the transition-metal complex alone, and the alkane alone—and then subtracting the latter two energies from the first. Favorable (negative) interaction energies were then reported as positive binding energies. The standard counterpoise method (6) was then used to correct the binding energies for basis set superposition error (BSSE) (Figure 8, Figure 10). However, the BSSE-uncorrected binding energies are also reported (Figure 9, Figure 11), since some experts recommend that the BSSE correction not be performed (7). Frequency calculations were performed on the HF-, DFT(B3LYP)-, and DFT(BP86)-optimized structures to ensure that they represented true minima; all structures calculated at the HF, BP86, and B3LYP levels had zero imaginary frequencies, or one imaginary frequency smaller than  $36\text{ cm}^{-1}$  in magnitude. Frequency analyses are still in progress for the RIMP2 and SOS-MP2 structures. The binding energies reported here, unlike in the manuscript, were NOT corrected for zero-point vibrational frequencies (Figures 8-11).

**4. Snapshots and Cartesian coordinates of the optimized ([CpM(CO)<sub>2</sub>](alkane)) and ((CO)<sub>2</sub>M(C<sub>5</sub>H<sub>4</sub>)C≡C(C<sub>5</sub>H<sub>4</sub>)M(CO)<sub>2</sub>](alkane)) complexes (M = Mn or Re), at the DFT(B3LYP), DFT(BP86), and RIMP2 levels of theory.**

**4-1. Mononuclear rhenium complexes.**

**4-1a. Mononuclear Re, HF.**

Complex only, optimized geometry:

|    |          |           |           |
|----|----------|-----------|-----------|
| C  | 3.605438 | -0.860965 | 0.678797  |
| C  | 3.923427 | 0.055197  | -0.347927 |
| C  | 3.300992 | -0.395904 | -1.555264 |
| C  | 2.605470 | -1.584618 | -1.247764 |
| C  | 2.782132 | -1.889067 | 0.119236  |
| H  | 3.965763 | -0.821360 | 1.685977  |
| H  | 4.566048 | 0.905662  | -0.250418 |
| H  | 3.395642 | 0.050637  | -2.523123 |
| H  | 2.023281 | -2.159523 | -1.941038 |
| H  | 2.420456 | -2.759001 | 0.626671  |
| Re | 1.676173 | 0.181311  | 0.039971  |
| C  | 0.947931 | 0.278558  | 1.842373  |
| O  | 0.610953 | 0.295916  | 2.922508  |
| C  | 1.576885 | 2.107122  | -0.225582 |
| O  | 1.619230 | 3.225745  | -0.391115 |

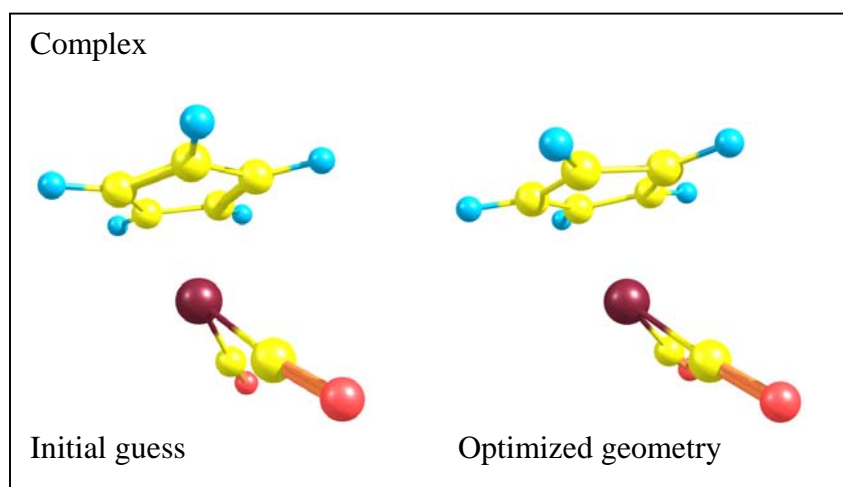

Methane, optimized geometry:

|    |           |           |           |
|----|-----------|-----------|-----------|
| C  | -1.955386 | -1.176135 | -0.320171 |
| C  | -1.640664 | -0.438016 | -1.505323 |
| C  | -1.719566 | 0.937634  | -1.197992 |
| C  | -2.079131 | 1.067756  | 0.179623  |
| C  | -2.218628 | -0.238445 | 0.699414  |
| H  | -2.033950 | -2.240394 | -0.238467 |
| H  | -1.439903 | -0.853274 | -2.471237 |
| H  | -1.583951 | 1.742124  | -1.891116 |
| H  | -2.271755 | 1.981705  | 0.701831  |
| H  | -2.472385 | -0.478357 | 1.713255  |
| Re | 0.033208  | 0.049106  | -0.014932 |
| C  | 1.190729  | 1.585549  | -0.278207 |
| O  | 1.799770  | 2.516603  | -0.491587 |
| C  | 1.334142  | -1.167344 | -0.790703 |
| O  | 2.033425  | -1.897872 | -1.300627 |
| C  | 1.148027  | -0.762557 | 2.573603  |
| H  | 2.211602  | -0.900743 | 2.444765  |
| H  | 0.930759  | -0.442362 | 3.584975  |
| H  | 0.823405  | 0.086395  | 1.942725  |
| H  | 0.621769  | -1.679371 | 2.359414  |

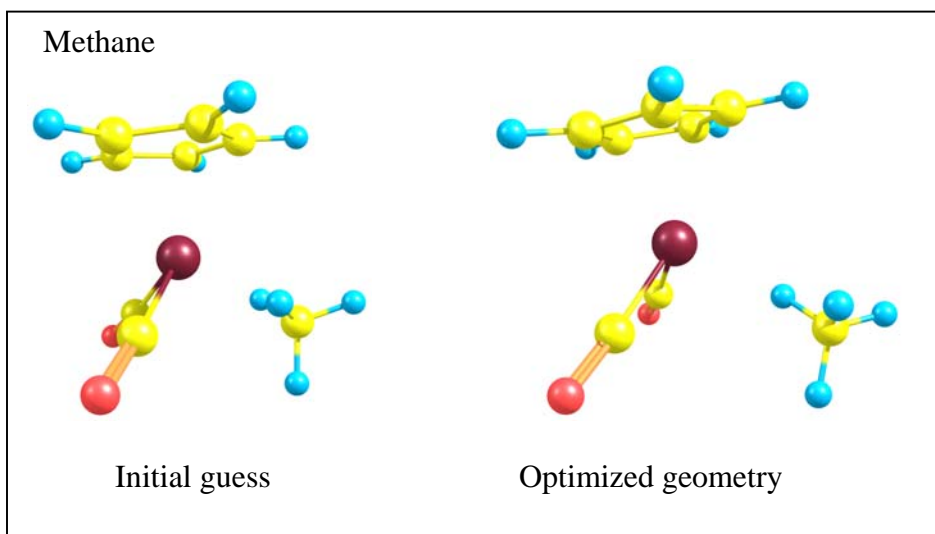

Ethane:

|    |           |           |           |
|----|-----------|-----------|-----------|
| C  | 1.764567  | -1.452154 | 0.803071  |
| C  | 2.213127  | -0.100680 | 0.946651  |
| C  | 2.337273  | 0.458288  | -0.343689 |
| C  | 1.964167  | -0.536755 | -1.299876 |
| C  | 1.616009  | -1.699662 | -0.576941 |
| H  | 1.623902  | -2.160524 | 1.592952  |
| H  | 2.467754  | 0.384173  | 1.866377  |
| H  | 2.697522  | 1.441341  | -0.567122 |
| H  | 2.004219  | -0.440363 | -2.364851 |
| H  | 1.279838  | -2.621507 | -1.009269 |
| Re | 0.112125  | 0.040624  | 0.033903  |
| C  | -0.496311 | 1.677513  | -0.812403 |
| O  | -0.761560 | 2.657634  | -1.315124 |
| C  | -0.779830 | 0.477019  | 1.701452  |
| O  | -1.222088 | 0.730507  | 2.713349  |
| C  | -2.244637 | -1.596279 | -0.657008 |
| H  | -1.529257 | -0.791782 | -0.928725 |
| H  | -1.961278 | -2.088524 | 0.261181  |
| H  | -2.153317 | -2.310082 | -1.467623 |
| C  | -3.646518 | -1.001162 | -0.575540 |
| H  | -4.380759 | -1.783755 | -0.414268 |
| H  | -3.725451 | -0.294950 | 0.242944  |
| H  | -3.905821 | -0.483104 | -1.492297 |

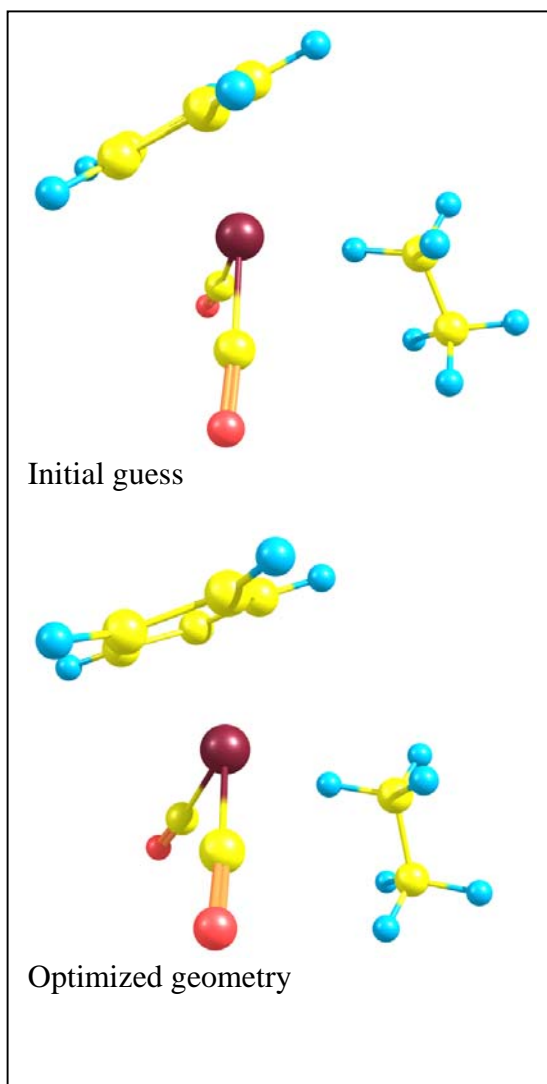

Propane:

|    |           |           |           |
|----|-----------|-----------|-----------|
| C  | -1.940721 | -1.785645 | -0.151116 |
| C  | -2.672195 | -0.675603 | -0.679270 |
| C  | -2.866171 | 0.257910  | 0.361507  |
| C  | -2.257931 | -0.263550 | 1.546616  |
| C  | -1.696208 | -1.514066 | 1.212264  |
| H  | -1.156820 | -2.151260 | 1.885132  |
| H  | -1.683792 | -2.682771 | -0.675097 |
| H  | -3.054116 | -0.590222 | -1.675668 |
| H  | -3.420453 | 1.170792  | 0.288150  |
| H  | -2.277373 | 0.183246  | 2.518825  |
| Re | -0.617259 | 0.161521  | -0.089888 |
| C  | -0.324425 | 2.062522  | 0.164557  |
| O  | -0.248134 | 3.181636  | 0.324825  |
| C  | 0.075485  | 0.212893  | -1.901532 |
| O  | 0.402752  | 0.215497  | -2.986400 |
| C  | 2.031729  | -0.760636 | 0.792720  |
| C  | 3.310239  | -0.110487 | 0.268339  |
| C  | 4.497840  | -1.072033 | 0.298221  |
| H  | 2.141718  | -1.099254 | 1.817457  |
| H  | 1.735110  | -1.605368 | 0.187681  |
| H  | 1.233159  | 0.008970  | 0.849230  |
| H  | 3.146876  | 0.236042  | -0.747287 |
| H  | 3.537160  | 0.769210  | 0.863647  |
| H  | 4.704088  | -1.411148 | 1.309449  |
| H  | 5.394969  | -0.592929 | -0.079782 |
| H  | 4.307853  | -1.949139 | -0.313800 |

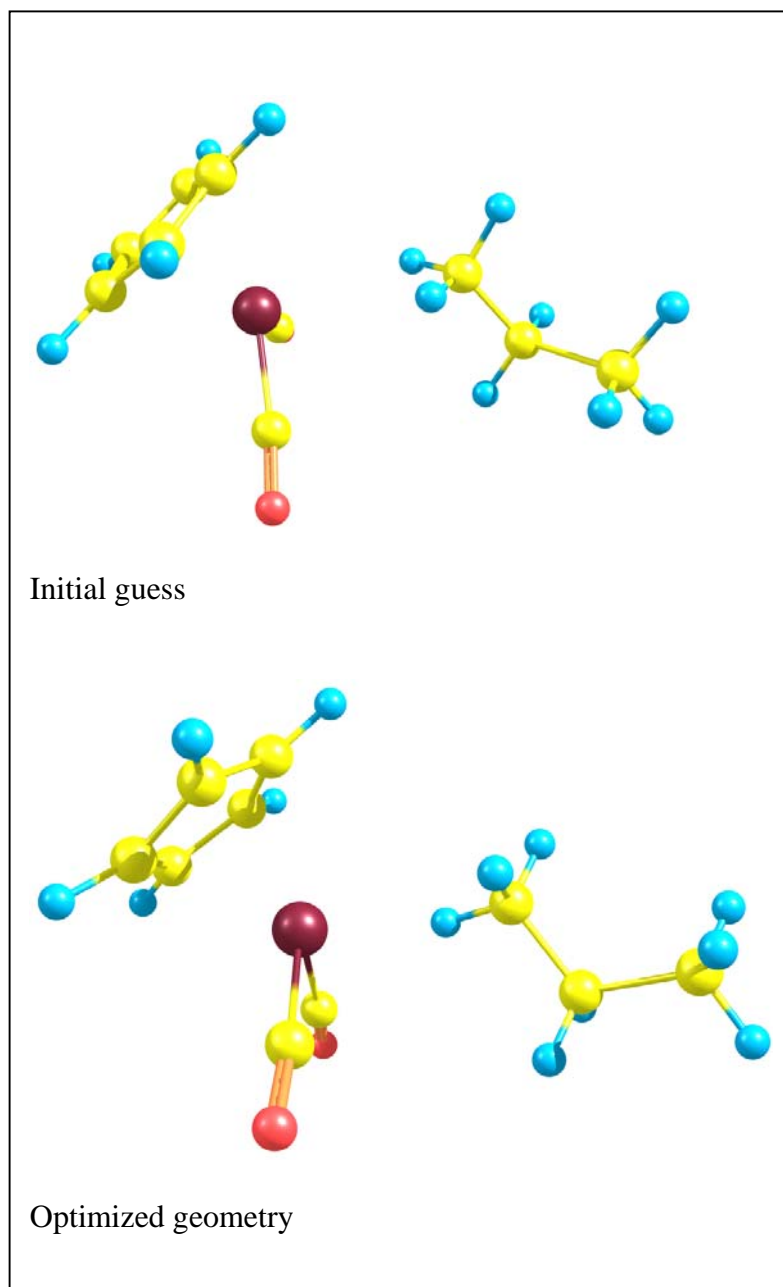

Butane:

|    |           |           |           |
|----|-----------|-----------|-----------|
| C  | -1.639343 | -1.599299 | 1.292517  |
| C  | -2.536708 | -1.133447 | 0.280221  |
| C  | -1.981673 | -1.452320 | -0.978069 |
| C  | -0.734314 | -2.116438 | -0.759926 |
| C  | -0.542279 | -2.195904 | 0.637000  |
| H  | -1.798248 | -1.555474 | 2.349919  |
| H  | -3.490257 | -0.676148 | 0.446133  |
| H  | -2.442367 | -1.275030 | -1.927997 |
| H  | -0.097235 | -2.532806 | -1.512232 |
| H  | 0.309120  | -2.630315 | 1.122760  |
| Re | -0.623244 | 0.102660  | 0.018482  |
| C  | -0.250799 | 1.070176  | -1.622125 |
| O  | -0.089042 | 1.578986  | -2.621584 |
| C  | -1.316992 | 1.685535  | 0.904221  |
| O  | -1.796684 | 2.566761  | 1.430118  |
| C  | 2.058025  | 0.942791  | 1.067572  |
| H  | 2.164158  | 0.698115  | 2.117781  |
| H  | 1.662754  | 1.944349  | 0.986036  |
| H  | 1.338059  | 0.201617  | 0.661557  |
| C  | 3.370639  | 0.786135  | 0.303742  |
| H  | 4.092020  | 1.490772  | 0.711773  |
| H  | 3.217252  | 1.068094  | -0.734352 |
| C  | 3.945001  | -0.629062 | 0.371812  |
| H  | 3.219881  | -1.329077 | -0.038133 |
| H  | 4.088882  | -0.909499 | 1.413307  |
| C  | 5.267463  | -0.770356 | -0.380423 |
| H  | 5.648667  | -1.784577 | -0.316592 |
| H  | 5.147515  | -0.527124 | -1.432124 |
| H  | 6.023806  | -0.106368 | 0.028173  |

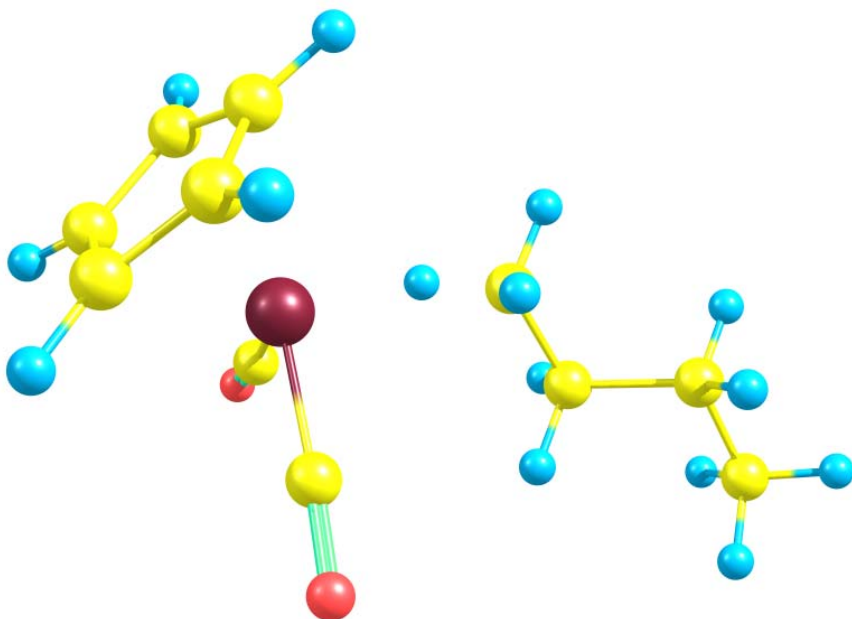

Initial guess

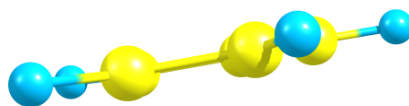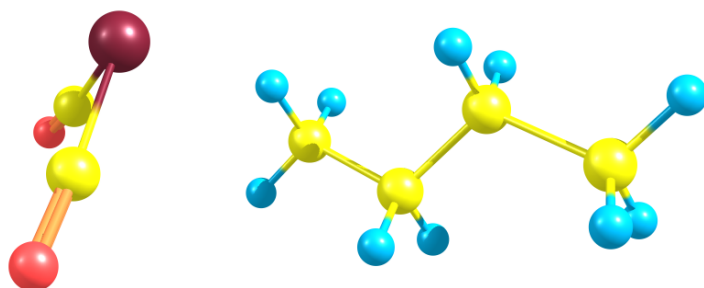

Optimized geometry

Pentane:

|    |           |           |           |
|----|-----------|-----------|-----------|
| C  | -1.938592 | -1.796114 | -0.176938 |
| C  | -2.692667 | -0.690794 | -0.683350 |
| C  | -2.896468 | 0.222318  | 0.373618  |
| C  | -2.270904 | -0.306096 | 1.546248  |
| C  | -1.689280 | -1.541432 | 1.188353  |
| H  | -1.134030 | -2.179318 | 1.847529  |
| H  | -1.668539 | -2.679855 | -0.716859 |
| H  | -3.083667 | -0.597157 | -1.675451 |
| H  | -3.467215 | 1.126298  | 0.318093  |
| H  | -2.292541 | 0.124522  | 2.525667  |
| Re | -0.649548 | 0.173885  | -0.093853 |
| C  | -0.395690 | 2.078432  | 0.174198  |
| O  | -0.341707 | 3.197638  | 0.342843  |
| C  | 0.038007  | 0.253077  | -1.906477 |
| O  | 0.362806  | 0.269659  | -2.991979 |
| C  | 2.011089  | -0.709704 | 0.781422  |
| C  | 3.282859  | -0.073179 | 0.225022  |
| C  | 4.476280  | -1.029757 | 0.263770  |
| H  | 2.132050  | -1.021023 | 1.813427  |
| H  | 1.707224  | -1.569789 | 0.202262  |
| H  | 1.213466  | 0.061751  | 0.826691  |
| H  | 3.106220  | 0.247074  | -0.797814 |
| H  | 3.515518  | 0.823028  | 0.794360  |
| H  | 4.648548  | -1.350786 | 1.289909  |
| H  | 4.235433  | -1.928826 | -0.301269 |
| C  | 5.759527  | -0.411657 | -0.294154 |
| H  | 6.000583  | 0.486708  | 0.269844  |
| H  | 5.587862  | -0.091817 | -1.319390 |
| C  | 6.948710  | -1.370578 | -0.253785 |
| H  | 7.842663  | -0.904247 | -0.655720 |
| H  | 7.167241  | -1.682281 | 0.763739  |
| H  | 6.751290  | -2.265023 | -0.837825 |

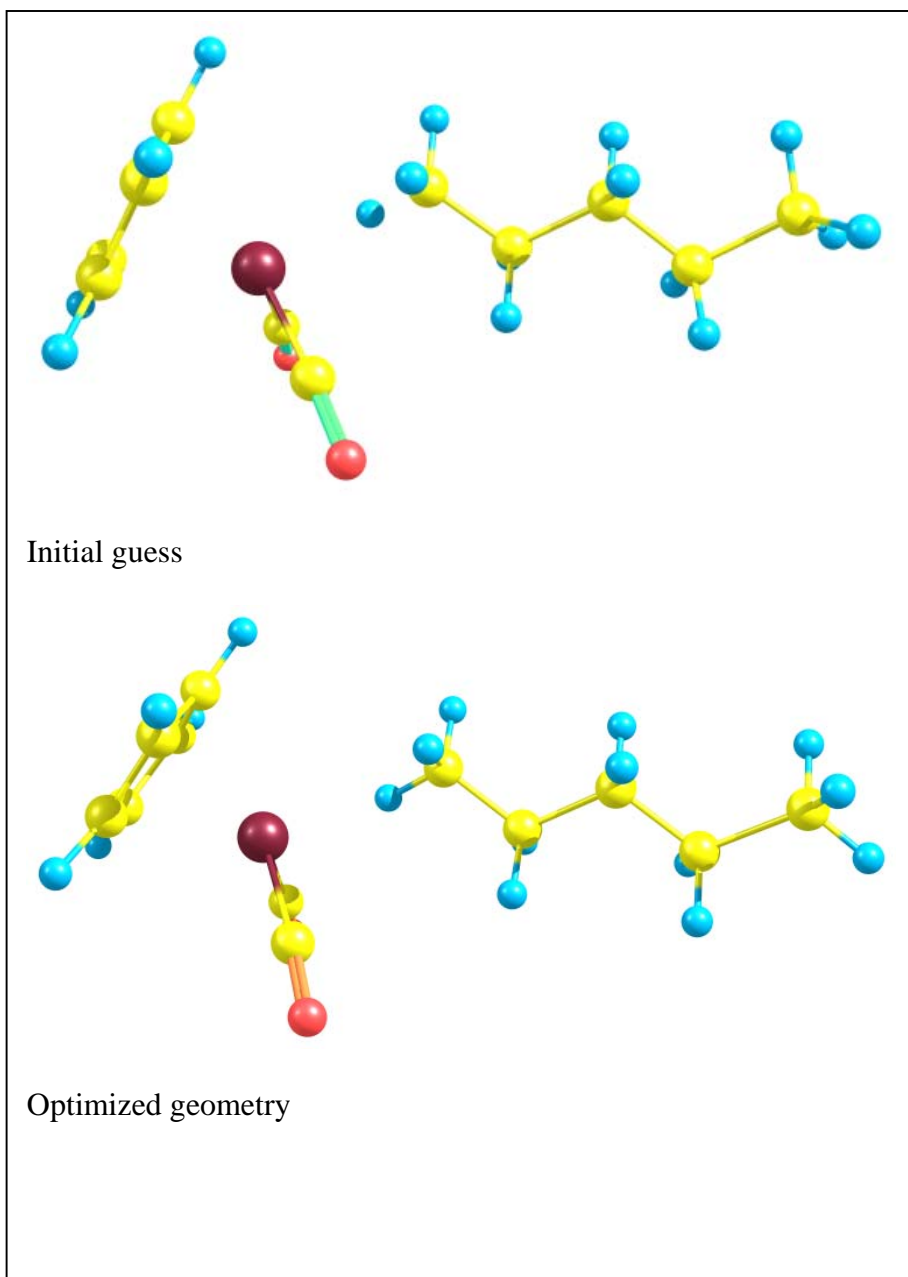

Hexane:

|    |           |           |           |
|----|-----------|-----------|-----------|
| C  | -2.983478 | -1.052347 | 1.236409  |
| C  | -3.596846 | -0.196987 | 0.267498  |
| C  | -3.255208 | -0.672340 | -1.016908 |
| C  | -2.425083 | -1.826272 | -0.858584 |
| C  | -2.269831 | -2.041910 | 0.527932  |
| H  | -3.093607 | -0.988594 | 2.298956  |
| H  | -4.247918 | 0.626414  | 0.477388  |
| H  | -3.602392 | -0.269347 | -1.945913 |
| H  | -2.046698 | -2.447780 | -1.643414 |
| H  | -1.689918 | -2.826318 | 0.973026  |
| Re | -1.334859 | 0.080326  | -0.009013 |
| C  | -1.266927 | 1.777480  | 0.928876  |
| O  | -1.322405 | 2.764082  | 1.483386  |
| C  | -0.582066 | 0.848333  | -1.624317 |
| O  | -0.214804 | 1.274383  | -2.608006 |
| C  | 1.366373  | -0.850462 | 0.682550  |
| H  | 1.464650  | -1.526902 | 1.524708  |
| H  | 0.488983  | -0.221639 | 0.943519  |
| H  | 1.189710  | -1.439431 | -0.205879 |
| C  | 2.588521  | 0.052658  | 0.530590  |
| H  | 2.690177  | 0.672174  | 1.417892  |
| H  | 2.432283  | 0.730458  | -0.303772 |
| C  | 3.876721  | -0.743088 | 0.310341  |
| H  | 4.026437  | -1.424969 | 1.145860  |
| H  | 3.767498  | -1.365287 | -0.576383 |
| C  | 5.111274  | 0.146730  | 0.155639  |
| H  | 5.219256  | 0.769304  | 1.042134  |
| H  | 4.960473  | 0.828797  | -0.679096 |
| C  | 6.402038  | -0.643756 | -0.065550 |
| H  | 6.554054  | -1.325817 | 0.768344  |
| H  | 6.296172  | -1.264838 | -0.952432 |
| C  | 7.630886  | 0.251770  | -0.218006 |
| H  | 8.529478  | -0.337120 | -0.373546 |
| H  | 7.523940  | 0.922759  | -1.065538 |
| H  | 7.783861  | 0.861389  | 0.668044  |

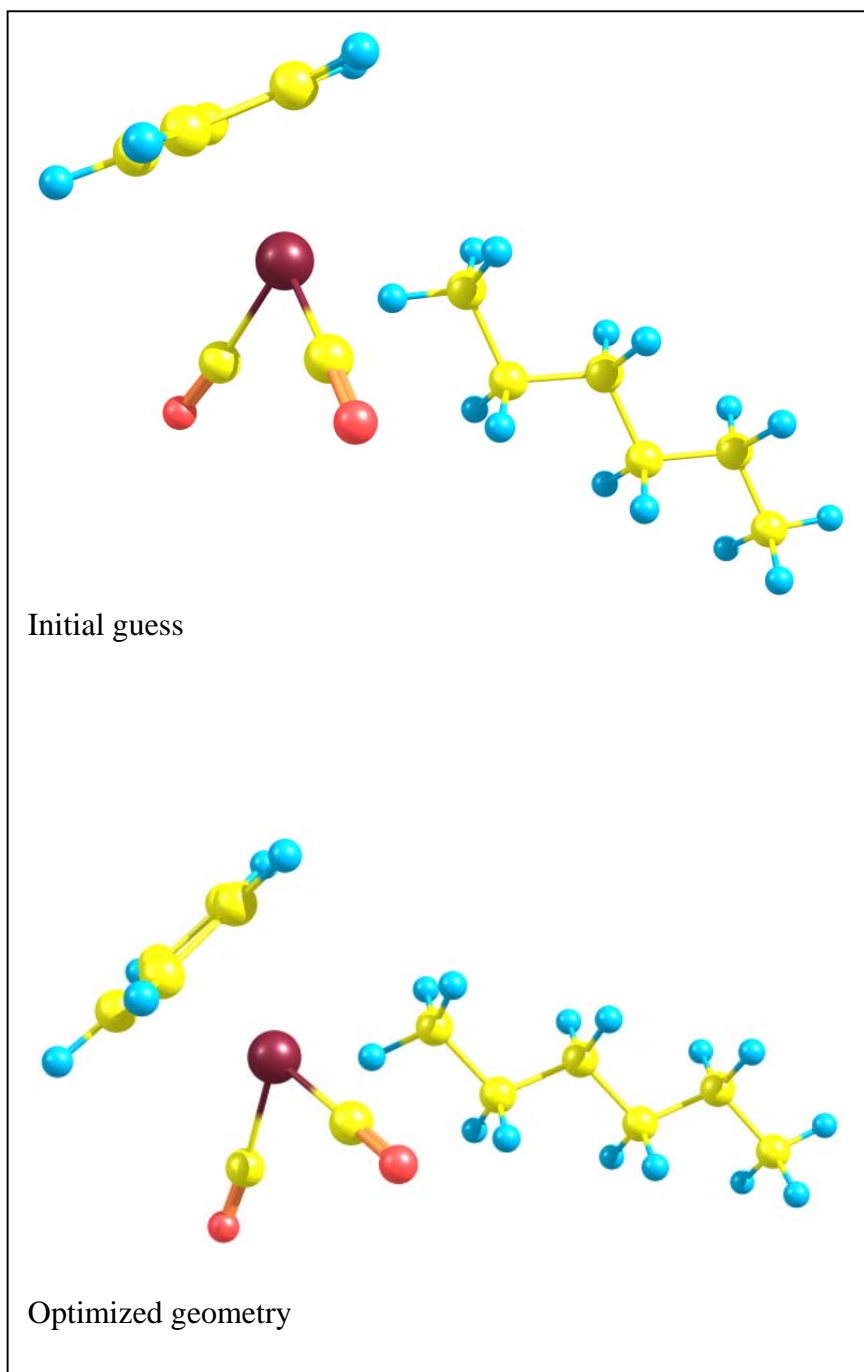

Heptane:

|    |           |           |           |
|----|-----------|-----------|-----------|
| C  | -4.690601 | -0.126727 | 0.257823  |
| C  | -4.318609 | -0.947366 | -0.828711 |
| C  | -3.460871 | -1.979585 | -0.334290 |
| C  | -3.319814 | -1.775091 | 1.055497  |
| C  | -4.068799 | -0.642586 | 1.438463  |
| H  | -4.195223 | -0.273382 | 2.434918  |
| H  | -2.725845 | -2.377306 | 1.714474  |
| H  | -3.055469 | -2.792531 | -0.900119 |
| H  | -4.662641 | -0.844233 | -1.837174 |
| H  | -5.365503 | 0.703002  | 0.213224  |
| Re | -2.432620 | 0.123108  | -0.074694 |
| C  | -2.420312 | 2.021095  | 0.327614  |
| O  | -2.508412 | 3.124564  | 0.569577  |
| C  | -1.679182 | 0.410304  | -1.839350 |
| O  | -1.310344 | 0.543065  | -2.902594 |
| C  | 0.271434  | -0.503680 | 0.889347  |
| C  | 1.484645  | 0.313382  | 0.450427  |
| C  | 2.781806  | -0.496030 | 0.509229  |
| C  | 4.008464  | 0.303828  | 0.066865  |
| C  | 5.307448  | -0.501555 | 0.129573  |
| C  | 6.535533  | 0.295203  | -0.314466 |
| C  | 7.829554  | -0.515085 | -0.246697 |
| H  | -0.614357 | 0.164692  | 0.933146  |
| H  | 0.103778  | -1.351881 | 0.241384  |
| H  | 0.374639  | -0.867858 | 1.905845  |
| H  | 1.574649  | 1.192373  | 1.083426  |
| H  | 1.326563  | 0.675505  | -0.561429 |
| H  | 2.682495  | -1.379976 | -0.118558 |
| H  | 2.934474  | -0.857921 | 1.524688  |
| H  | 4.103881  | 1.189982  | 0.691835  |
| H  | 3.855474  | 0.662534  | -0.949255 |
| H  | 5.211567  | -1.389098 | -0.493806 |
| H  | 5.460842  | -0.859340 | 1.146506  |
| H  | 6.632793  | 1.182743  | 0.307149  |
| H  | 6.385266  | 0.650611  | -1.331589 |
| H  | 8.681450  | 0.076181  | -0.567942 |
| H  | 8.026481  | -0.855616 | 0.766024  |
| H  | 7.776648  | -1.392626 | -0.884971 |

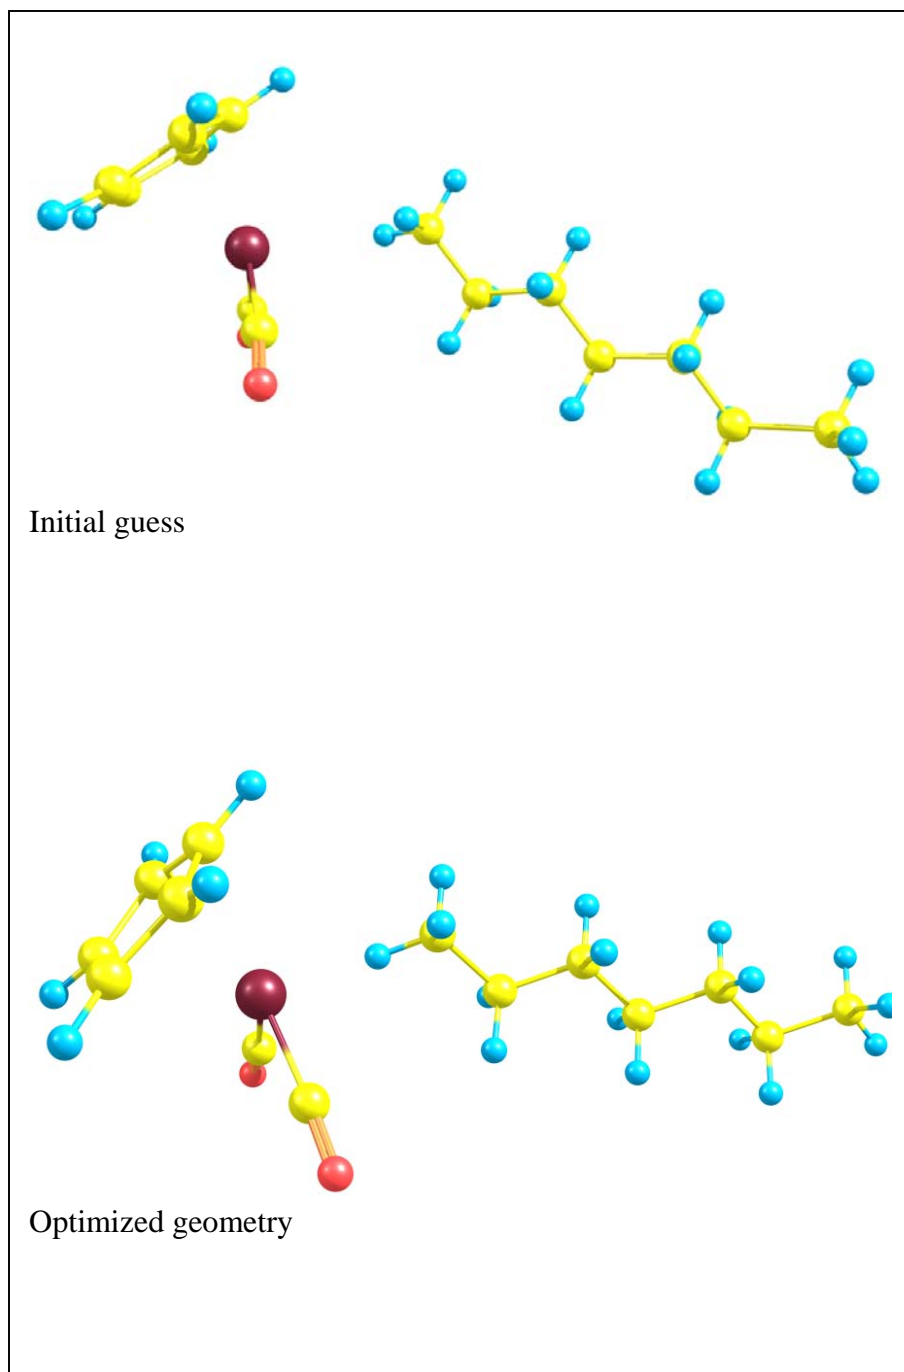



Cyclopropane:

|    |           |           |           |
|----|-----------|-----------|-----------|
| C  | -1.296421 | -0.097736 | -1.703984 |
| C  | -2.147881 | 0.615769  | -0.832746 |
| C  | -2.344712 | -0.178369 | 0.341954  |
| C  | -1.603297 | -1.364932 | 0.175468  |
| C  | -0.950150 | -1.334787 | -1.078229 |
| H  | -1.000847 | 0.215326  | -2.684188 |
| H  | -2.614801 | 1.555639  | -1.043428 |
| H  | -2.979975 | 0.061105  | 1.169399  |
| H  | -1.534991 | -2.160127 | 0.891548  |
| H  | -0.364394 | -2.121101 | -1.506755 |
| Re | -0.085901 | 0.469055  | 0.161331  |
| C  | 1.518394  | 0.924353  | -0.825573 |
| O  | 2.411174  | 1.178319  | -1.476451 |
| C  | -0.151408 | 2.216517  | 1.010693  |
| O  | -0.263236 | 3.244727  | 1.471281  |
| C  | 1.318164  | -0.331701 | 2.542384  |
| C  | 2.452202  | 0.578491  | 2.893897  |
| C  | 2.601815  | -0.892742 | 3.090505  |
| H  | 0.448917  | -0.348015 | 3.169654  |
| H  | 2.999776  | 1.039834  | 2.092488  |
| H  | 2.330992  | 1.202167  | 3.761394  |
| H  | 3.243975  | -1.431305 | 2.417060  |
| H  | 2.581567  | -1.283349 | 4.092267  |
| H  | 1.155234  | -0.602228 | 1.490174  |

Initial guess

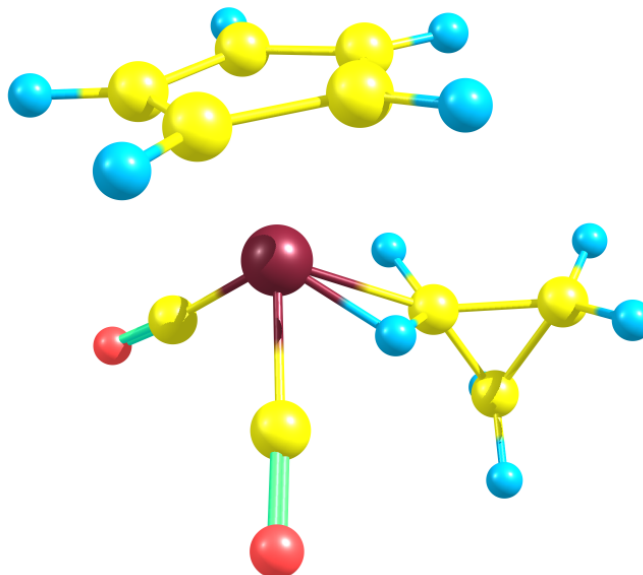

Optimized geometry

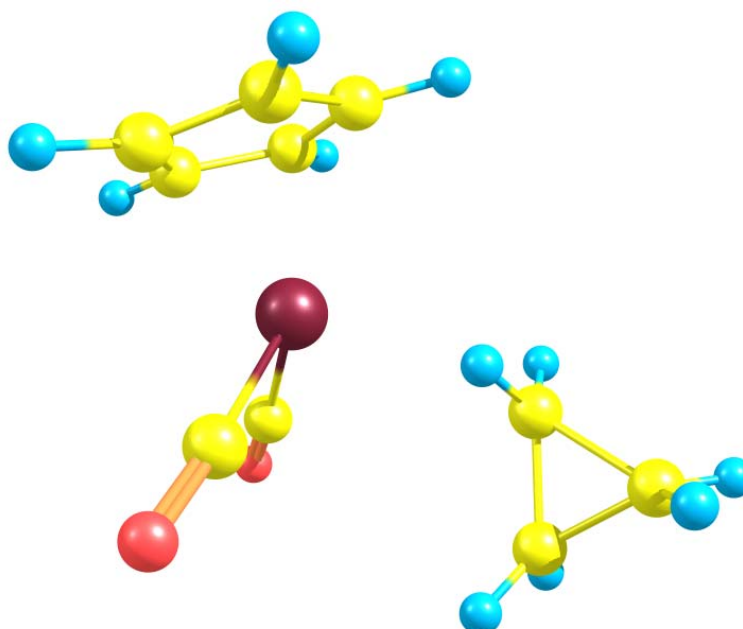

Cyclobutane:

|    |           |           |           |
|----|-----------|-----------|-----------|
| C  | -0.944192 | 0.328630  | -1.698462 |
| C  | -2.021271 | 0.490684  | -0.800522 |
| C  | -2.214775 | -0.748973 | -0.112038 |
| C  | -1.246945 | -1.652468 | -0.595955 |
| C  | -0.455220 | -1.008555 | -1.573492 |
| H  | -0.588981 | 1.066141  | -2.388424 |
| H  | -2.624816 | 1.368831  | -0.698280 |
| H  | -2.986667 | -0.966199 | 0.596860  |
| H  | -1.122567 | -2.664929 | -0.265639 |
| H  | 0.320767  | -1.457874 | -2.157461 |
| Re | -0.114010 | 0.168219  | 0.437196  |
| C  | 1.503542  | 1.168490  | 0.053837  |
| O  | 2.414853  | 1.768337  | -0.252988 |
| C  | -0.613314 | 1.379604  | 1.869320  |
| O  | -0.976546 | 2.103274  | 2.661892  |
| C  | 2.338587  | -2.284626 | 4.052697  |
| C  | 1.907575  | -0.858525 | 3.639891  |
| C  | 1.038835  | -1.492097 | 2.537934  |
| C  | 1.860999  | -2.792947 | 2.672747  |
| H  | 3.381072  | -2.437077 | 4.304342  |
| H  | 2.732779  | -0.292179 | 3.224004  |
| H  | 1.402922  | -0.247015 | 4.377437  |
| H  | 1.126457  | -1.036944 | 1.528123  |
| H  | 0.010580  | -1.622098 | 2.837227  |
| H  | 2.672081  | -2.832940 | 1.954827  |
| H  | 1.317887  | -3.729740 | 2.638044  |
| H  | 1.726937  | -2.673755 | 4.859100  |

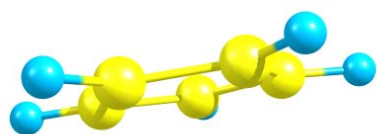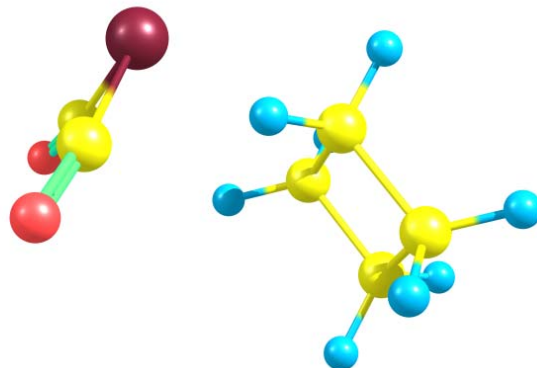

Initial guess

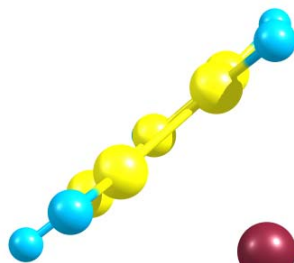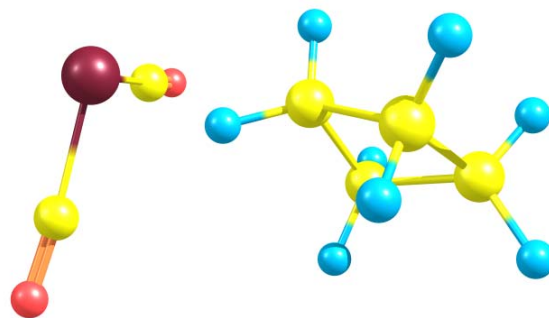

Optimized geometry

Cyclopentane:

|    |           |           |           |
|----|-----------|-----------|-----------|
| C  | -1.723569 | 0.265457  | -2.453903 |
| C  | -2.747220 | 0.688201  | -1.577373 |
| C  | -3.025144 | -0.384247 | -0.670241 |
| C  | -2.161084 | -1.447809 | -1.002259 |
| C  | -1.353572 | -1.069554 | -2.097951 |
| H  | -1.331342 | 0.829276  | -3.274936 |
| H  | -3.265327 | 1.623649  | -1.624838 |
| H  | -3.785767 | -0.397324 | 0.082465  |
| H  | -2.115419 | -2.391117 | -0.494244 |
| H  | -0.646313 | -1.689869 | -2.607776 |
| Re | -0.839012 | 0.417425  | -0.353531 |
| C  | 0.857068  | 1.159463  | -0.954679 |
| O  | 1.804302  | 1.594334  | -1.395679 |
| C  | -1.194979 | 1.918077  | 0.833858  |
| O  | -1.485013 | 2.809946  | 1.467062  |
| C  | 3.841174  | -1.873437 | 4.123431  |
| C  | 2.433237  | -2.143873 | 4.680734  |
| C  | 1.502947  | -1.591949 | 3.597221  |
| C  | 2.193461  | -0.286621 | 3.183841  |
| C  | 3.705671  | -0.602043 | 3.243987  |
| H  | 4.162643  | -2.714247 | 3.516337  |
| H  | 2.262061  | -3.192205 | 4.901607  |
| H  | 2.281232  | -1.589995 | 5.604112  |
| H  | 1.469045  | -2.282216 | 2.756162  |
| H  | 0.483873  | -1.444635 | 3.940933  |
| H  | 1.944509  | 0.493253  | 3.897977  |
| H  | 1.884176  | 0.070281  | 2.206357  |
| H  | 4.263617  | 0.232706  | 3.653400  |
| H  | 4.101012  | -0.782242 | 2.249950  |
| H  | 4.578208  | -1.754519 | 4.909816  |

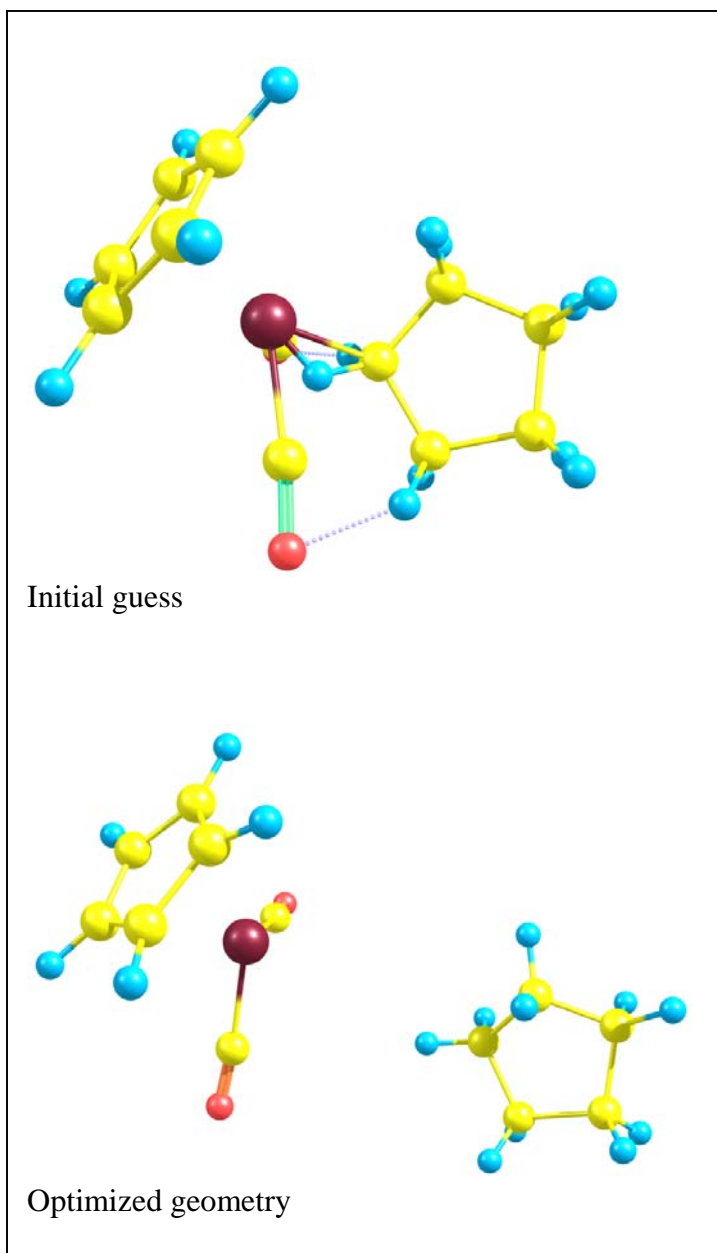

Cyclohexane:

|    |           |           |           |
|----|-----------|-----------|-----------|
| C  | 0.674863  | 0.755414  | -2.187590 |
| C  | -0.580807 | 0.735163  | -1.543295 |
| C  | -0.889621 | -0.622035 | -1.213283 |
| C  | 0.187156  | -1.416296 | -1.661374 |
| C  | 1.158365  | -0.588508 | -2.264034 |
| H  | 1.154457  | 1.620817  | -2.596330 |
| H  | -1.214773 | 1.582342  | -1.381121 |
| H  | -1.795861 | -0.975561 | -0.766973 |
| H  | 0.261330  | -2.480241 | -1.551444 |
| H  | 2.058943  | -0.912377 | -2.742866 |
| Re | 1.008036  | 0.095757  | -0.013614 |
| C  | 2.670382  | 1.072130  | 0.194801  |
| O  | 3.628258  | 1.676706  | 0.231250  |
| C  | 0.184161  | 1.010723  | 1.485050  |
| O  | -0.357596 | 1.572903  | 2.306495  |
| C  | 2.608158  | -3.287932 | 1.303651  |
| C  | 2.408668  | -4.563779 | 2.128564  |
| C  | 2.556754  | -4.290519 | 3.628344  |
| C  | 1.611835  | -3.176722 | 4.089173  |
| C  | 1.807583  | -1.896070 | 3.270520  |
| C  | 1.661785  | -2.179932 | 1.773711  |
| H  | 3.635666  | -2.946296 | 1.407610  |
| H  | 1.416365  | -4.967443 | 1.932761  |
| H  | 3.119784  | -5.321495 | 1.812195  |
| H  | 2.367207  | -5.198775 | 4.193351  |
| H  | 3.584478  | -4.000568 | 3.840417  |
| H  | 0.581423  | -3.513783 | 3.987456  |
| H  | 1.765878  | -2.965526 | 5.143292  |
| H  | 2.799207  | -1.491602 | 3.461837  |
| H  | 1.094406  | -1.139192 | 3.579449  |
| H  | 0.636878  | -2.446479 | 1.547184  |
| H  | 1.946326  | -1.258164 | 1.220084  |
| H  | 2.451841  | -3.491152 | 0.248588  |

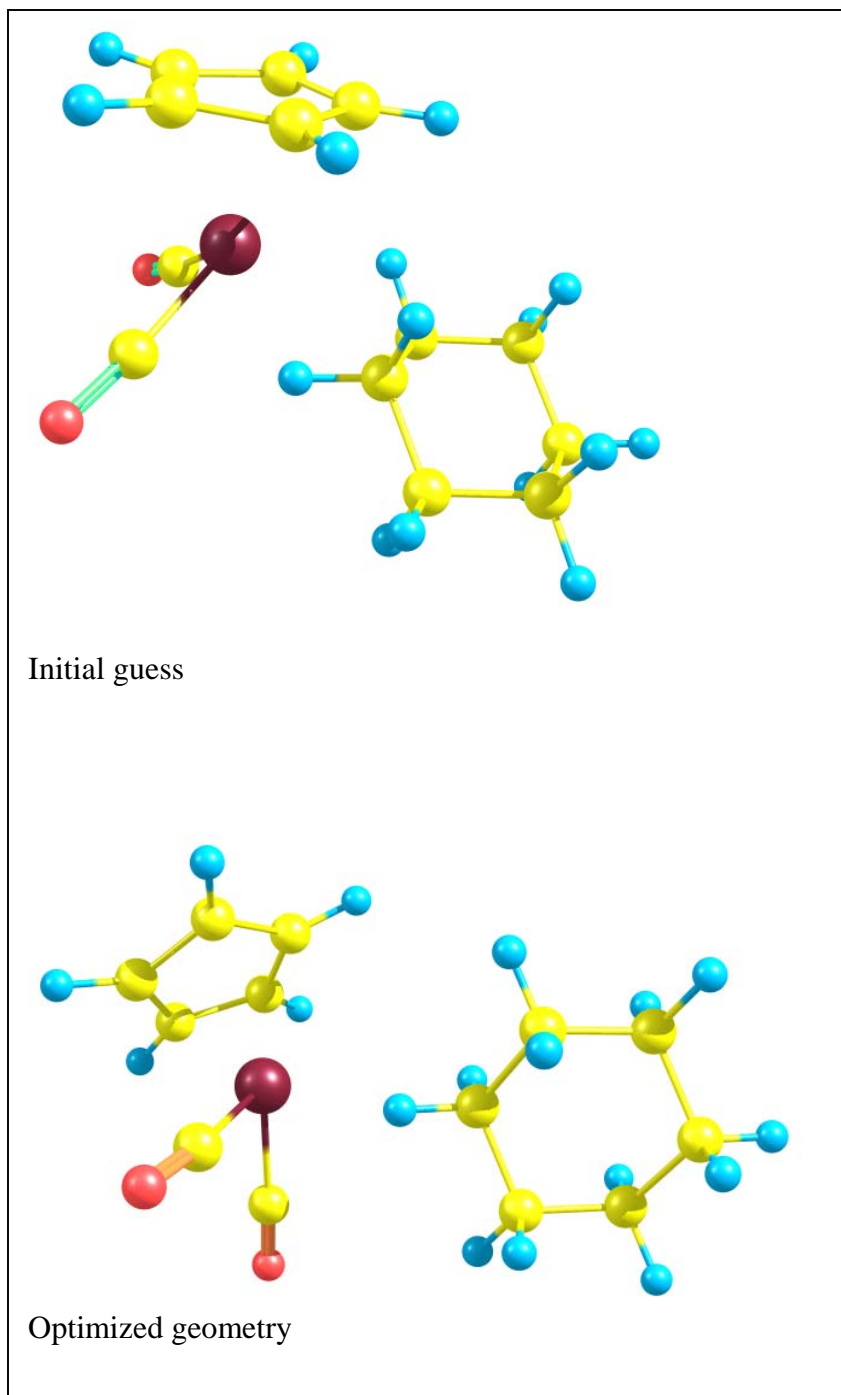

#### 4-1b. Mononuclear Re, DFT(B3LYP).

Complex:

|    |          |           |           |
|----|----------|-----------|-----------|
| C  | 3.545177 | -0.922036 | 0.714706  |
| C  | 3.874920 | 0.076494  | -0.267969 |
| C  | 3.329393 | -0.360196 | -1.532427 |
| C  | 2.628290 | -1.567854 | -1.298451 |
| C  | 2.770469 | -1.944863 | 0.075168  |
| H  | 3.860299 | -0.916213 | 1.749294  |
| H  | 4.501083 | 0.942098  | -0.104083 |
| H  | 3.416554 | 0.155919  | -2.478296 |
| H  | 2.057162 | -2.111465 | -2.041349 |
| H  | 2.390725 | -2.845675 | 0.535963  |
| Re | 1.680782 | 0.127930  | 0.066840  |
| C  | 1.096397 | 0.371261  | 1.865996  |
| O  | 0.849101 | 0.492911  | 3.000042  |
| C  | 1.501764 | 1.995185  | -0.305573 |
| O  | 1.517706 | 3.136216  | -0.546557 |

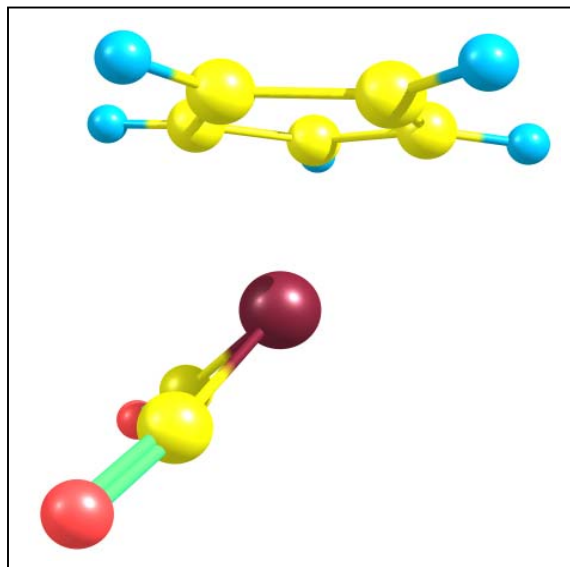

Methane:

|    |           |           |           |
|----|-----------|-----------|-----------|
| C  | -1.956586 | -1.204733 | -0.342735 |
| C  | -1.583204 | -0.404854 | -1.483201 |
| C  | -1.668079 | 0.973678  | -1.098084 |
| C  | -2.077372 | 1.032334  | 0.277645  |
| C  | -2.227193 | -0.315445 | 0.728916  |
| H  | -2.025916 | -2.283304 | -0.313674 |
| H  | -1.363068 | -0.774531 | -2.475258 |
| H  | -1.503924 | 1.821926  | -1.748702 |
| H  | -2.261940 | 1.926335  | 0.856278  |
| H  | -2.490179 | -0.609683 | 1.738099  |
| Re | 0.029314  | 0.011358  | 0.030413  |
| C  | 1.215934  | 1.459095  | -0.323029 |
| O  | 1.871713  | 2.382762  | -0.607494 |
| C  | 1.281481  | -1.216226 | -0.718300 |
| O  | 1.978226  | -1.990180 | -1.246009 |
| C  | 1.096396  | -0.655456 | 2.474104  |
| H  | 2.184561  | -0.725517 | 2.480208  |
| H  | 0.713057  | -0.389905 | 3.462551  |
| H  | 0.835011  | 0.255794  | 1.851355  |
| H  | 0.663283  | -1.601447 | 2.156160  |

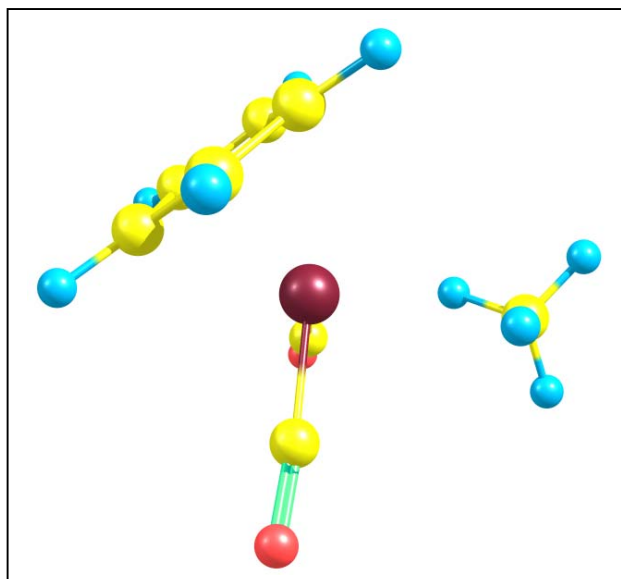

Ethane:

|    |           |           |           |
|----|-----------|-----------|-----------|
| C  | 1.775377  | -1.451113 | 0.831477  |
| C  | 2.159648  | -0.063884 | 0.919634  |
| C  | 2.240524  | 0.453051  | -0.415766 |
| C  | 1.899847  | -0.602146 | -1.328882 |
| C  | 1.595299  | -1.755606 | -0.542399 |
| H  | 1.646396  | -2.132741 | 1.660873  |
| H  | 2.416131  | 0.470411  | 1.823758  |
| H  | 2.548212  | 1.453998  | -0.686468 |
| H  | 1.893553  | -0.541142 | -2.407748 |
| H  | 1.267345  | -2.710675 | -0.934153 |
| Re | 0.081490  | -0.018625 | 0.042859  |
| C  | -0.533399 | 1.623348  | -0.699642 |
| O  | -0.806471 | 2.657368  | -1.169639 |
| C  | -0.799931 | 0.359423  | 1.689722  |
| O  | -1.257457 | 0.582975  | 2.741017  |
| C  | -2.154332 | -1.529026 | -0.650446 |
| H  | -1.452090 | -0.702543 | -1.004973 |
| H  | -1.870268 | -1.980000 | 0.300236  |
| H  | -2.033552 | -2.284019 | -1.434602 |
| C  | -3.564412 | -0.940841 | -0.608518 |
| H  | -4.301774 | -1.732233 | -0.432200 |
| H  | -3.659030 | -0.204259 | 0.195046  |
| H  | -3.817430 | -0.445903 | -1.552042 |

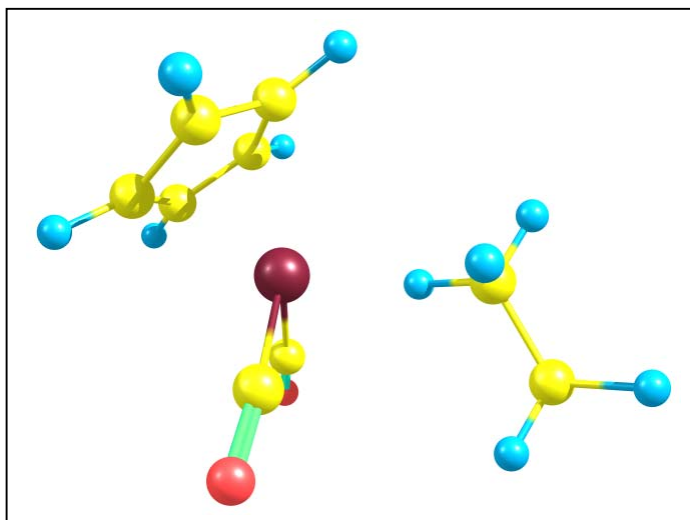

Propane:

|    |           |           |           |
|----|-----------|-----------|-----------|
| C  | -1.874858 | -1.818281 | -0.139196 |
| C  | -2.538488 | -0.680395 | -0.719872 |
| C  | -2.776850 | 0.273259  | 0.323196  |
| C  | -2.263871 | -0.272909 | 1.553250  |
| C  | -1.694065 | -1.539613 | 1.245795  |
| H  | -1.191624 | -2.186521 | 1.955418  |
| H  | -1.586186 | -2.724910 | -0.652267 |
| H  | -2.857841 | -0.585848 | -1.748570 |
| H  | -3.308330 | 1.208584  | 0.215369  |
| H  | -2.311139 | 0.190618  | 2.528680  |
| Re | -0.553423 | 0.125995  | -0.017783 |
| C  | -0.269610 | 1.993927  | 0.222593  |
| O  | -0.193776 | 3.148888  | 0.379625  |
| C  | 0.203428  | 0.221562  | -1.762248 |
| O  | 0.601293  | 0.252907  | -2.860395 |
| C  | 1.942374  | -0.746300 | 0.805566  |
| C  | 3.192126  | -0.104221 | 0.196203  |
| C  | 4.396230  | -1.050989 | 0.231395  |
| H  | 2.111944  | -1.108225 | 1.826687  |
| H  | 1.586978  | -1.584692 | 0.205521  |
| H  | 1.160544  | 0.065395  | 0.984930  |
| H  | 2.977613  | 0.184961  | -0.838988 |
| H  | 3.428234  | 0.821412  | 0.736161  |
| H  | 4.671828  | -1.309300 | 1.261222  |
| H  | 5.270331  | -0.592725 | -0.243590 |
| H  | 4.180519  | -1.986449 | -0.299920 |

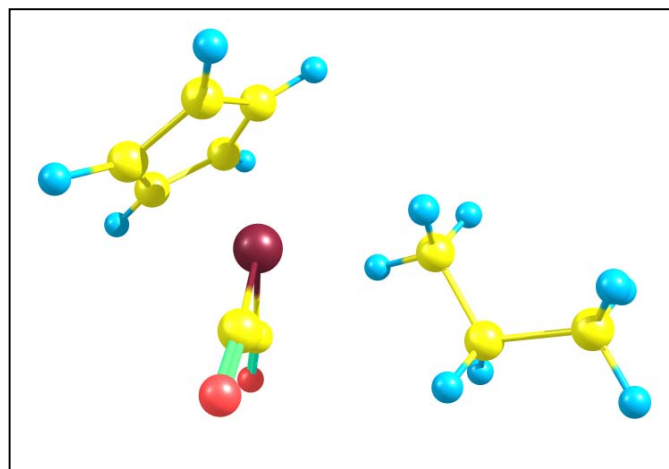

Butane:

|    |           |           |           |
|----|-----------|-----------|-----------|
| C  | -1.879376 | -1.823389 | -0.118818 |
| C  | -2.544606 | -0.692704 | -0.711234 |
| C  | -2.781552 | 0.273010  | 0.321130  |
| C  | -2.266416 | -0.259189 | 1.556555  |
| C  | -1.696285 | -1.528805 | 1.262601  |
| H  | -1.192135 | -2.167228 | 1.978665  |
| H  | -1.590554 | -2.735362 | -0.622225 |
| H  | -2.866169 | -0.610895 | -1.740353 |
| H  | -3.314609 | 1.206326  | 0.203911  |
| H  | -2.313018 | 0.214783  | 2.527007  |
| Re | -0.558665 | 0.122259  | -0.021809 |
| C  | -0.269762 | 1.991537  | 0.201926  |
| O  | -0.189886 | 3.147426  | 0.350150  |
| C  | 0.193480  | 0.200099  | -1.768990 |
| O  | 0.589407  | 0.218431  | -2.868205 |
| C  | 1.937682  | -0.746434 | 0.797776  |
| C  | 3.186521  | -0.098787 | 0.194315  |
| C  | 4.395084  | -1.044305 | 0.195913  |
| H  | 2.105865  | -1.116341 | 1.816180  |
| H  | 1.581788  | -1.579656 | 0.191052  |
| H  | 1.156487  | 0.064993  | 0.982250  |
| H  | 2.969333  | 0.213902  | -0.834386 |
| H  | 3.433150  | 0.815290  | 0.751203  |
| H  | 4.613218  | -1.357094 | 1.226986  |
| H  | 4.139948  | -1.961291 | -0.354354 |
| C  | 5.643686  | -0.405939 | -0.421777 |
| H  | 5.938307  | 0.495441  | 0.128805  |
| H  | 6.492734  | -1.098624 | -0.409307 |
| H  | 5.463811  | -0.114828 | -1.463680 |

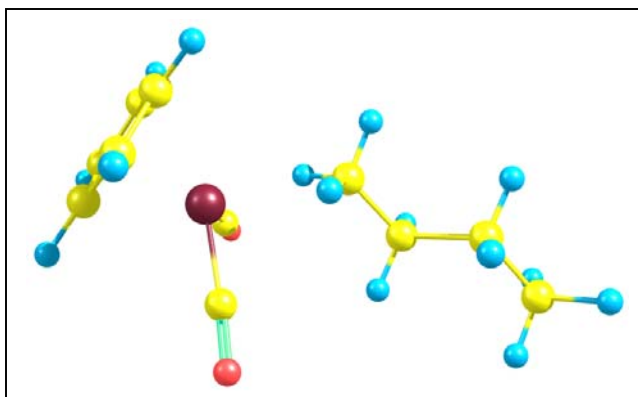

Pentane:

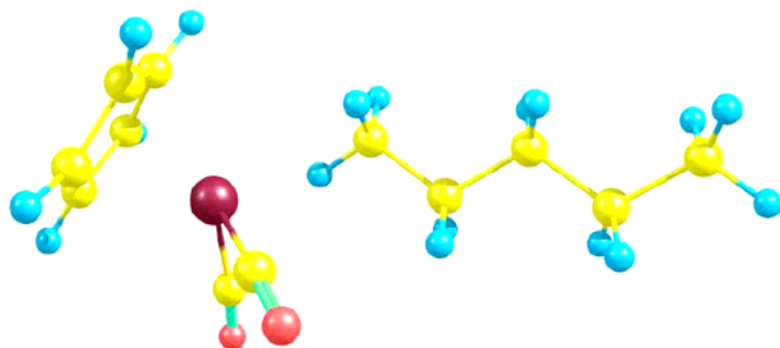

|    |           |           |           |
|----|-----------|-----------|-----------|
| C  | -1.869114 | -1.819592 | -0.177335 |
| C  | -2.526283 | -0.676591 | -0.755281 |
| C  | -2.783149 | 0.264587  | 0.294609  |
| C  | -2.288650 | -0.294686 | 1.526541  |
| C  | -1.711694 | -1.556673 | 1.213861  |
| H  | -1.219614 | -2.210845 | 1.924027  |
| H  | -1.570739 | -2.720012 | -0.695812 |
| H  | -2.826623 | -0.569046 | -1.788357 |
| H  | -3.313657 | 1.200652  | 0.188783  |
| H  | -2.350047 | 0.159293  | 2.505578  |
| Re | -0.554986 | 0.126325  | -0.012375 |
| C  | -0.282119 | 1.992033  | 0.256111  |
| O  | -0.214290 | 3.145532  | 0.427046  |
| C  | 0.228583  | 0.248603  | -1.743048 |
| O  | 0.645853  | 0.297129  | -2.833435 |
| C  | 1.932698  | -0.750469 | 0.827074  |
| C  | 3.179073  | -0.098007 | 0.223613  |
| C  | 4.401048  | -1.024867 | 0.261124  |
| H  | 2.099963  | -1.112878 | 1.848371  |
| H  | 1.582428  | -1.589245 | 0.224790  |
| H  | 1.144604  | 0.055503  | 1.007518  |
| H  | 2.968835  | 0.188557  | -0.813899 |
| H  | 3.404981  | 0.831897  | 0.762588  |
| H  | 4.624049  | -1.297641 | 1.303523  |
| H  | 4.164001  | -1.966361 | -0.256443 |
| C  | 5.648036  | -0.399197 | -0.378445 |
| H  | 5.867848  | 0.554780  | 0.120548  |
| H  | 5.428314  | -0.151381 | -1.426315 |
| C  | 6.876412  | -1.311354 | -0.311908 |
| H  | 7.741257  | -0.856524 | -0.807497 |
| H  | 7.159022  | -1.520562 | 0.727225  |
| H  | 6.680490  | -2.274006 | -0.800648 |



Hexane:

|    |           |           |           |
|----|-----------|-----------|-----------|
| C  | -2.843918 | -1.228954 | 1.196240  |
| C  | -3.488026 | -0.347960 | 0.258047  |
| C  | -3.081532 | -0.726938 | -1.062644 |
| C  | -2.184796 | -1.847942 | -0.945533 |
| C  | -2.032159 | -2.123857 | 0.441283  |
| H  | -2.972553 | -1.226461 | 2.269464  |
| H  | -4.202696 | 0.426700  | 0.499962  |
| H  | -3.442718 | -0.290625 | -1.983121 |
| H  | -1.715977 | -2.379221 | -1.762040 |
| H  | -1.383459 | -2.884127 | 0.860209  |
| Re | -1.290279 | 0.099690  | 0.030904  |
| C  | -1.423561 | 1.761959  | 0.949673  |
| O  | -1.609205 | 2.768137  | 1.513952  |
| C  | -0.564527 | 0.973950  | -1.498972 |
| O  | -0.191848 | 1.479185  | -2.484199 |
| C  | 1.270247  | -0.608500 | 0.788115  |
| H  | 1.335765  | -1.219955 | 1.694649  |
| H  | 0.430054  | 0.121491  | 1.028160  |
| H  | 1.069570  | -1.270747 | -0.055215 |
| C  | 2.535282  | 0.221418  | 0.550799  |
| H  | 2.693681  | 0.902206  | 1.397675  |
| H  | 2.392794  | 0.853329  | -0.334384 |
| C  | 3.774105  | -0.664425 | 0.360540  |
| H  | 3.898778  | -1.312081 | 1.241212  |
| H  | 3.607998  | -1.338672 | -0.492883 |
| C  | 5.061616  | 0.136257  | 0.131987  |
| H  | 5.233267  | 0.803171  | 0.989839  |
| H  | 4.932402  | 0.791740  | -0.741670 |
| C  | 6.296437  | -0.749561 | -0.078254 |
| H  | 6.420580  | -1.409628 | 0.792114  |
| H  | 6.122380  | -1.411321 | -0.938701 |
| C  | 7.581660  | 0.053251  | -0.301509 |
| H  | 8.442427  | -0.606046 | -0.460668 |
| H  | 7.493392  | 0.704387  | -1.179976 |
| H  | 7.805563  | 0.692002  | 0.561676  |

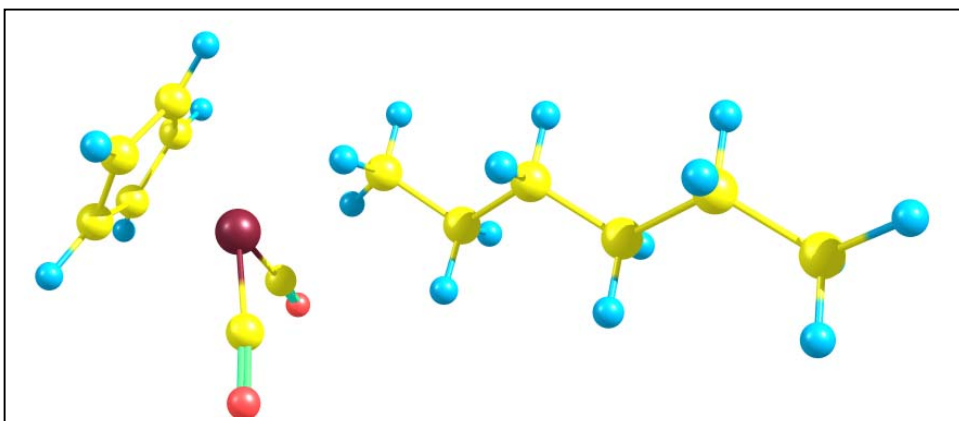

Heptane:

|    |           |           |           |
|----|-----------|-----------|-----------|
| C  | -4.556018 | -0.019141 | 0.130065  |
| C  | -4.178846 | -1.005235 | -0.839216 |
| C  | -3.448717 | -2.042369 | -0.161205 |
| C  | -3.371867 | -1.673518 | 1.214190  |
| C  | -4.069989 | -0.452464 | 1.416239  |
| H  | -4.206531 | 0.060093  | 2.358114  |
| H  | -2.853472 | -2.231767 | 1.984478  |
| H  | -3.049268 | -2.943556 | -0.605051 |
| H  | -4.441314 | -0.995849 | -1.887961 |
| H  | -5.157315 | 0.858674  | -0.061199 |
| Re | -2.314453 | 0.016558  | -0.079521 |
| C  | -2.204325 | 1.907189  | 0.131077  |
| O  | -2.252828 | 3.065698  | 0.271237  |
| C  | -1.495705 | 0.143894  | -1.795032 |
| O  | -1.057298 | 0.188837  | -2.877078 |
| C  | 0.202352  | -0.572285 | 0.886877  |
| C  | 1.419785  | 0.306851  | 0.586987  |
| C  | 2.710528  | -0.515160 | 0.474318  |
| C  | 3.951697  | 0.344056  | 0.200953  |
| C  | 5.234298  | -0.480533 | 0.037293  |
| C  | 6.480665  | 0.373213  | -0.228354 |
| C  | 7.753780  | -0.461252 | -0.399967 |
| H  | -0.693711 | 0.120507  | 1.043146  |
| H  | 0.058088  | -1.333142 | 0.118646  |
| H  | 0.278347  | -1.078527 | 1.855665  |
| H  | 1.528908  | 1.064794  | 1.374269  |
| H  | 1.249339  | 0.853054  | -0.348908 |
| H  | 2.596461  | -1.255372 | -0.331152 |
| H  | 2.862959  | -1.090467 | 1.399849  |
| H  | 4.081877  | 1.064836  | 1.021421  |
| H  | 3.785295  | 0.942565  | -0.706708 |
| H  | 5.103610  | -1.194971 | -0.788993 |
| H  | 5.395937  | -1.087916 | 0.940695  |
| H  | 6.615285  | 1.084673  | 0.598616  |
| H  | 6.315722  | 0.981730  | -1.128930 |
| H  | 8.624888  | 0.172257  | -0.601985 |
| H  | 7.968945  | -1.046521 | 0.502731  |
| H  | 7.654171  | -1.166737 | -1.234216 |

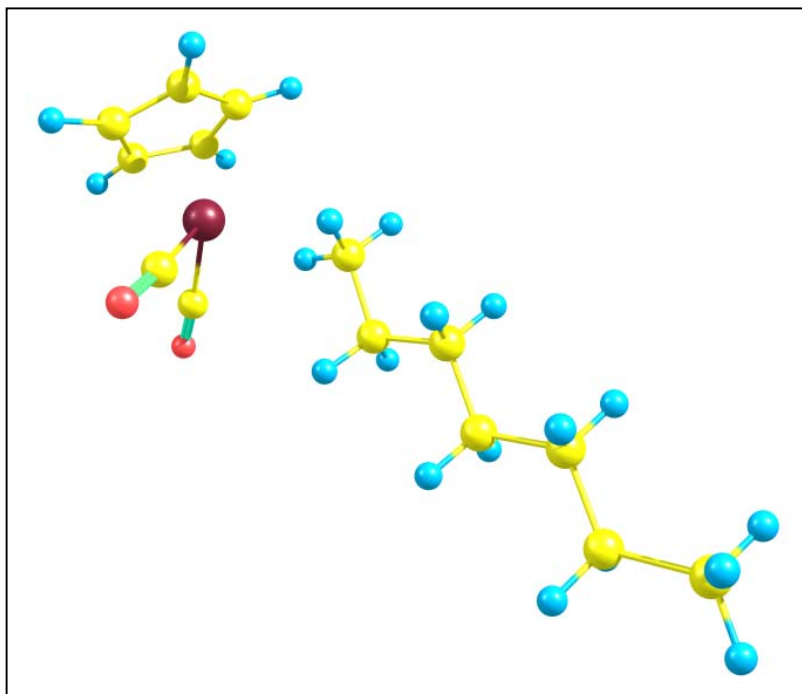

Cyclopropane:

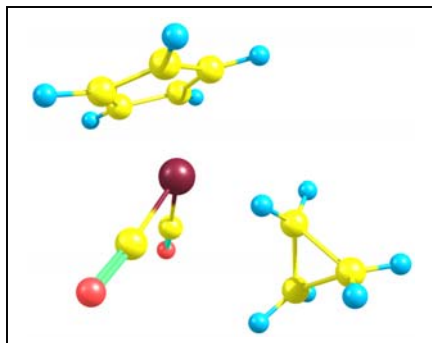

|    |           |           |           |
|----|-----------|-----------|-----------|
| C  | -1.208097 | -0.159747 | -1.645258 |
| C  | -2.039001 | 0.660237  | -0.814272 |
| C  | -2.334059 | -0.085957 | 0.384243  |
| C  | -1.652722 | -1.326446 | 0.291510  |
| C  | -0.969168 | -1.398814 | -0.962388 |
| H  | -0.859075 | 0.095634  | -2.636530 |
| H  | -2.443983 | 1.627218  | -1.077938 |
| H  | -2.952322 | 0.245534  | 1.206968  |
| H  | -1.645949 | -2.097386 | 1.052905  |
| H  | -0.412105 | -2.244201 | -1.340796 |
| Re | -0.040591 | 0.422932  | 0.205573  |
| C  | 1.514971  | 0.891379  | -0.783834 |
| O  | 2.416434  | 1.165912  | -1.475527 |
| C  | -0.053768 | 2.135067  | 1.044689  |
| O  | -0.138167 | 3.190593  | 1.535349  |
| C  | 1.269674  | -0.379498 | 2.390636  |
| C  | 2.254006  | 0.627481  | 2.924639  |
| C  | 2.632032  | -0.822245 | 2.918954  |
| H  | 0.397839  | -0.631726 | 2.980251  |
| H  | 2.741840  | 1.287312  | 2.214527  |
| H  | 2.003679  | 1.098187  | 3.870979  |
| H  | 3.369341  | -1.155366 | 2.194123  |
| H  | 2.641300  | -1.371577 | 3.856076  |
| H  | 1.232086  | -0.619611 | 1.285266  |

Cyclobutane:

|    |           |           |           |
|----|-----------|-----------|-----------|
| C  | -0.878447 | 0.279417  | -1.645283 |
| C  | -1.950754 | 0.535156  | -0.729829 |
| C  | -2.243383 | -0.694745 | -0.037566 |
| C  | -1.329728 | -1.674326 | -0.509004 |
| C  | -0.497023 | -1.099714 | -1.516462 |
| H  | -0.462519 | 0.992318  | -2.344465 |
| H  | -2.493789 | 1.465375  | -0.634345 |
| H  | -3.014056 | -0.842007 | 0.706202  |
| H  | -1.266179 | -2.695150 | -0.151589 |
| H  | 0.260492  | -1.612127 | -2.092506 |
| Re | -0.085479 | 0.104048  | 0.466622  |
| C  | 1.499628  | 1.080573  | 0.073219  |
| O  | 2.435572  | 1.694810  | -0.261980 |
| C  | -0.510936 | 1.323935  | 1.866446  |
| O  | -0.853237 | 2.095384  | 2.674012  |
| C  | 2.284767  | -2.244390 | 4.014997  |
| C  | 1.739140  | -0.838147 | 3.639010  |
| C  | 1.032165  | -1.492296 | 2.432082  |
| C  | 1.977219  | -2.720496 | 2.566899  |
| H  | 3.324420  | -2.306761 | 4.349757  |
| H  | 2.538517  | -0.162084 | 3.320441  |
| H  | 1.105505  | -0.316901 | 4.361666  |
| H  | 1.207648  | -0.987554 | 1.421374  |
| H  | -0.007155 | -1.748116 | 2.633205  |
| H  | 2.853004  | -2.635258 | 1.915638  |
| H  | 1.532946  | -3.711355 | 2.432519  |
| H  | 1.648232  | -2.746319 | 4.751158  |

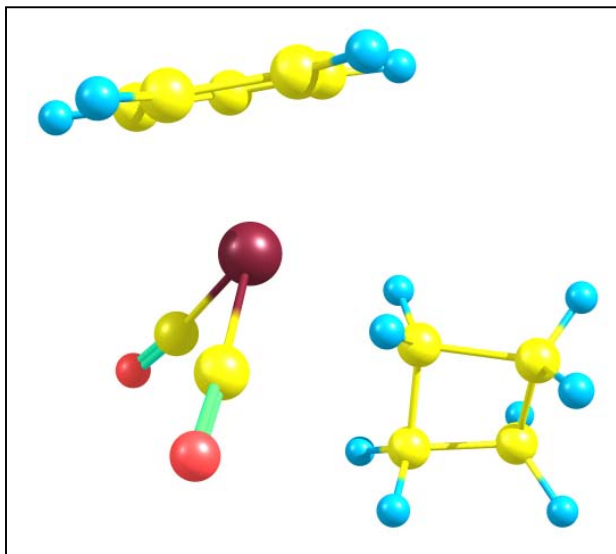

Cyclopentane:

|    |           |           |           |
|----|-----------|-----------|-----------|
| C  | -1.372027 | 0.174483  | -1.695744 |
| C  | -2.096042 | 0.913483  | -0.703909 |
| C  | -2.394180 | 0.019377  | 0.384978  |
| C  | -1.828626 | -1.245185 | 0.061499  |
| C  | -1.219806 | -1.176977 | -1.225250 |
| H  | -1.054026 | 0.554061  | -2.657117 |
| H  | -2.411716 | 1.944221  | -0.790395 |
| H  | -2.949437 | 0.262226  | 1.280139  |
| H  | -1.843277 | -2.119566 | 0.701208  |
| H  | -0.745560 | -1.991691 | -1.753794 |
| Re | -0.077470 | 0.362260  | 0.142125  |
| O  | 1.509769  | 0.696199  | -0.855839 |
| O  | 2.425668  | 0.900059  | -1.551968 |
| C  | 0.132684  | 2.007803  | 1.077047  |
| O  | 0.169848  | 3.044486  | 1.614123  |
| C  | 3.145358  | -1.051226 | 3.836913  |
| C  | 2.282599  | -2.330422 | 3.875889  |
| C  | 1.586141  | -2.344946 | 2.505681  |
| C  | 1.209033  | -0.861768 | 2.311883  |
| C  | 2.357812  | -0.040850 | 2.950684  |
| H  | 4.115644  | -1.273355 | 3.377561  |
| H  | 2.869014  | -3.235948 | 4.065150  |
| H  | 1.528541  | -2.258350 | 4.671546  |
| H  | 2.294968  | -2.659909 | 1.729264  |
| H  | 0.719852  | -3.012982 | 2.457719  |
| H  | 0.256815  | -0.650131 | 2.799699  |
| H  | 1.176575  | -0.693065 | 1.182888  |
| H  | 1.955883  | 0.793476  | 3.532947  |
| H  | 3.000858  | 0.394670  | 2.179844  |
| H  | 3.349580  | -0.656268 | 4.837069  |

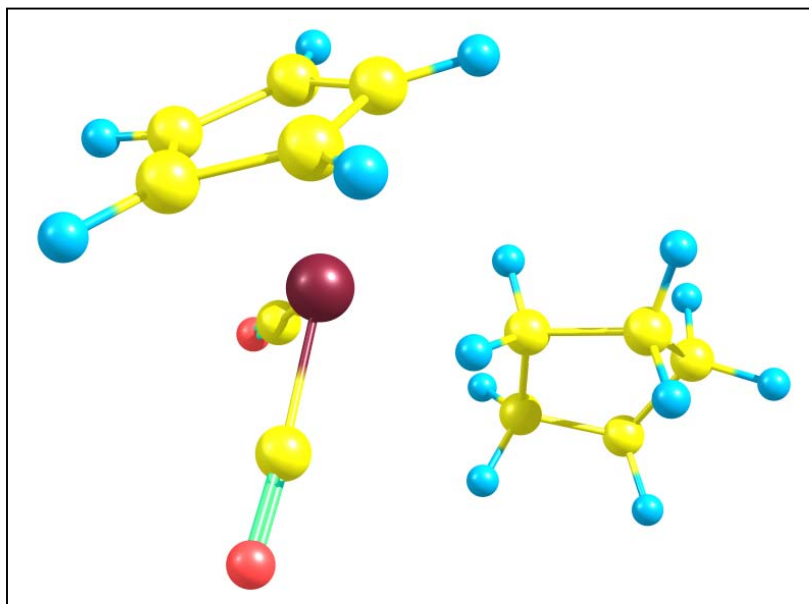

Cyclohexane:

|    |           |           |           |
|----|-----------|-----------|-----------|
| C  | 0.744092  | 0.615267  | -2.134867 |
| C  | -0.528563 | 0.680781  | -1.480860 |
| C  | -0.915518 | -0.661937 | -1.130199 |
| C  | 0.132612  | -1.526779 | -1.546475 |
| C  | 1.152266  | -0.763025 | -2.187106 |
| H  | 1.276159  | 1.453266  | -2.564035 |
| H  | -1.119641 | 1.574187  | -1.335917 |
| H  | -1.837315 | -0.955898 | -0.647696 |
| H  | 0.157243  | -2.599242 | -1.397671 |
| H  | 2.049174  | -1.149037 | -2.650287 |
| Re | 1.019624  | 0.024012  | 0.027488  |
| C  | 2.632084  | 1.019596  | 0.198638  |
| O  | 3.610293  | 1.658462  | 0.204721  |
| C  | 0.222761  | 0.964258  | 1.478934  |
| O  | -0.338969 | 1.565716  | 2.308317  |
| C  | 2.651943  | -3.142254 | 1.265999  |
| C  | 2.417031  | -4.468242 | 2.009343  |
| C  | 2.509466  | -4.284196 | 3.532332  |
| C  | 1.558749  | -3.183224 | 4.028097  |
| C  | 1.786626  | -1.852271 | 3.291089  |
| C  | 1.685882  | -2.061031 | 1.772103  |
| H  | 3.685753  | -2.807814 | 1.432226  |
| H  | 1.421152  | -4.857050 | 1.749882  |
| H  | 3.142969  | -5.218036 | 1.670940  |
| H  | 2.286938  | -5.230264 | 4.041827  |
| H  | 3.543034  | -4.022242 | 3.801766  |
| H  | 0.518442  | -3.505478 | 3.872204  |
| H  | 1.678502  | -3.033423 | 5.108143  |
| H  | 2.782740  | -1.459306 | 3.537259  |
| H  | 1.058907  | -1.101229 | 3.616894  |
| H  | 0.657367  | -2.323564 | 1.511358  |
| H  | 2.021449  | -1.079030 | 1.295219  |
| H  | 2.538285  | -3.279464 | 0.184192  |

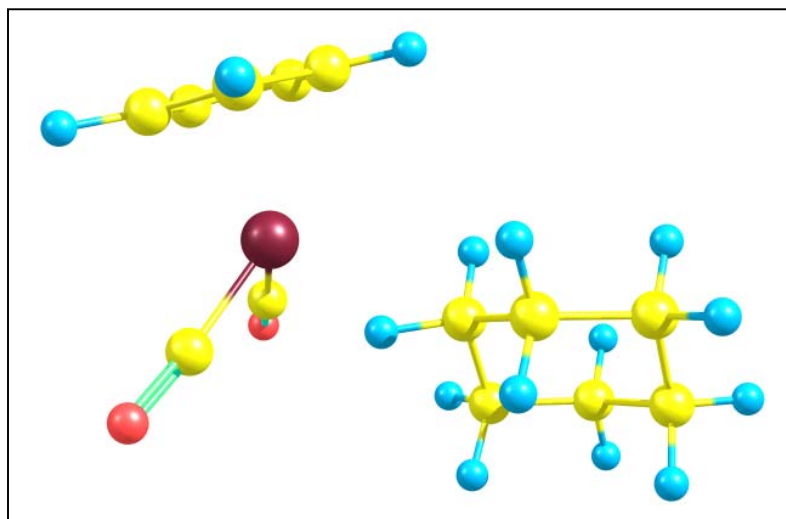

#### 4-1c. Mononuclear Re, DFT(BP86).

Complex:

|    |          |           |           |
|----|----------|-----------|-----------|
| C  | 3.538441 | -0.921959 | 0.727355  |
| C  | 3.869488 | 0.089747  | -0.261597 |
| C  | 3.333000 | -0.355475 | -1.538447 |
| C  | 2.623657 | -1.568982 | -1.303410 |
| C  | 2.768452 | -1.954911 | 0.078194  |
| H  | 3.848974 | -0.913619 | 1.772607  |
| H  | 4.493918 | 0.966529  | -0.091894 |
| H  | 3.413119 | 0.170630  | -2.489569 |
| H  | 2.044046 | -2.112393 | -2.053000 |
| H  | 2.379723 | -2.861349 | 0.541311  |
| Re | 1.695099 | 0.114523  | 0.061206  |
| C  | 1.114178 | 0.368500  | 1.855963  |
| O  | 0.871637 | 0.499522  | 3.005017  |
| C  | 1.505355 | 1.976785  | -0.313376 |
| O  | 1.520736 | 3.132162  | -0.557058 |

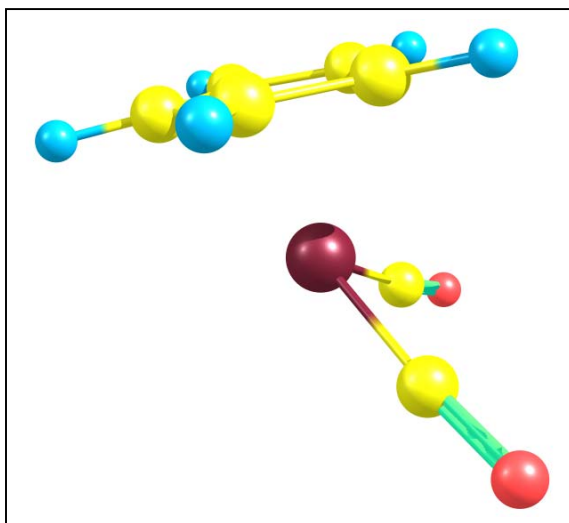

Methane:

|    |           |           |           |
|----|-----------|-----------|-----------|
| C  | -1.931396 | -1.223334 | -0.321101 |
| C  | -1.562537 | -0.412645 | -1.467219 |
| C  | -1.651264 | 0.975139  | -1.072306 |
| C  | -2.062838 | 1.027785  | 0.312652  |
| C  | -2.195121 | -0.332020 | 0.764211  |
| H  | -1.984111 | -2.311695 | -0.291557 |
| H  | -1.339421 | -0.780183 | -2.469119 |
| H  | -1.490446 | 1.833416  | -1.725480 |
| H  | -2.239856 | 1.925678  | 0.904016  |
| H  | -2.444709 | -0.633241 | 1.784231  |
| Re | 0.031780  | 0.008778  | 0.042990  |
| C  | 1.212070  | 1.452151  | -0.335450 |
| O  | 1.865677  | 2.387761  | -0.644374 |
| C  | 1.282101  | -1.211020 | -0.713249 |
| O  | 1.983909  | -1.992474 | -1.255005 |
| C  | 1.037772  | -0.640513 | 2.426101  |
| H  | 2.126378  | -0.763177 | 2.516170  |
| H  | 0.582059  | -0.349653 | 3.385021  |
| H  | 0.901758  | 0.309836  | 1.784376  |
| H  | 0.589713  | -1.578588 | 2.074336  |

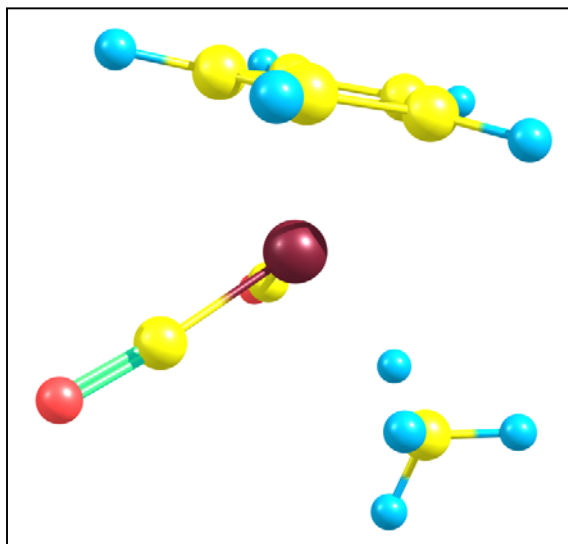

Ethane:

|    |           |           |           |
|----|-----------|-----------|-----------|
| C  | 1.737921  | -1.464776 | 0.841394  |
| C  | 2.131910  | -0.070218 | 0.926231  |
| C  | 2.219875  | 0.443893  | -0.422504 |
| C  | 1.877360  | -0.620940 | -1.338203 |
| C  | 1.551614  | -1.773782 | -0.540734 |
| H  | 1.588288  | -2.144270 | 1.680587  |
| H  | 2.386492  | 0.473185  | 1.836067  |
| H  | 2.532695  | 1.451553  | -0.698157 |
| H  | 1.862659  | -0.560695 | -2.425896 |
| H  | 1.212985  | -2.734527 | -0.933685 |
| Re | 0.076169  | -0.024594 | 0.033976  |
| C  | -0.511000 | 1.628289  | -0.699339 |
| O  | -0.763786 | 2.682010  | -1.172778 |
| C  | -0.808554 | 0.359347  | 1.674240  |
| O  | -1.272702 | 0.586001  | 2.737934  |
| C  | -2.099652 | -1.487506 | -0.659217 |
| H  | -1.451813 | -0.597886 | -1.035693 |
| H  | -1.781782 | -1.940764 | 0.290868  |
| H  | -1.947976 | -2.230019 | -1.461554 |
| C  | -3.538844 | -0.964754 | -0.589002 |
| H  | -4.240183 | -1.799778 | -0.412398 |
| H  | -3.655541 | -0.239526 | 0.233026  |
| H  | -3.832457 | -0.464426 | -1.528020 |

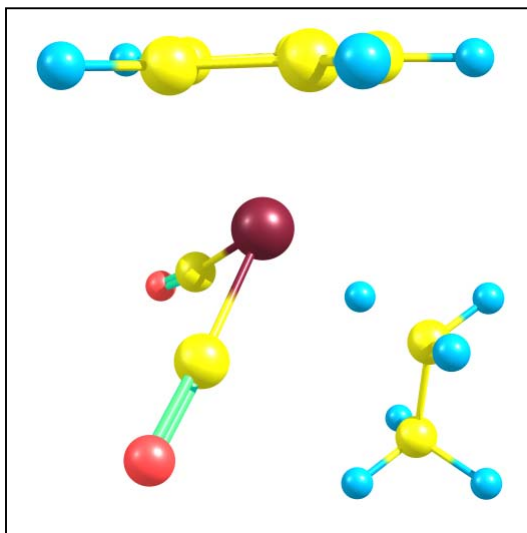

Propane:

|    |           |           |           |
|----|-----------|-----------|-----------|
| C  | -1.845406 | -1.831008 | -0.136439 |
| C  | -2.502356 | -0.683449 | -0.728602 |
| C  | -2.746525 | 0.281225  | 0.319000  |
| C  | -2.244164 | -0.269339 | 1.562543  |
| C  | -1.666207 | -1.543603 | 1.257405  |
| H  | -1.162880 | -2.193198 | 1.977867  |
| H  | -1.549862 | -2.746097 | -0.649602 |
| H  | -2.813088 | -0.587246 | -1.769033 |
| H  | -3.277692 | 1.226105  | 0.204182  |
| H  | -2.287871 | 0.204787  | 2.542904  |
| Re | -0.537758 | 0.109194  | -0.003024 |
| C  | -0.253222 | 1.974858  | 0.232810  |
| O  | -0.177803 | 3.144376  | 0.389268  |
| C  | 0.217774  | 0.220198  | -1.743962 |
| O  | 0.614424  | 0.264525  | -2.857611 |
| C  | 1.902701  | -0.745156 | 0.788781  |
| C  | 3.158929  | -0.099616 | 0.185621  |
| C  | 4.365639  | -1.049876 | 0.230893  |
| H  | 2.068922  | -1.135206 | 1.809953  |
| H  | 1.530958  | -1.572344 | 0.166803  |
| H  | 1.130253  | 0.093683  | 1.016713  |
| H  | 2.946759  | 0.189856  | -0.859188 |
| H  | 3.392342  | 0.835691  | 0.728381  |
| H  | 4.644415  | -1.300574 | 1.270994  |
| H  | 5.247051  | -0.593667 | -0.252596 |
| H  | 4.148048  | -1.997991 | -0.295282 |

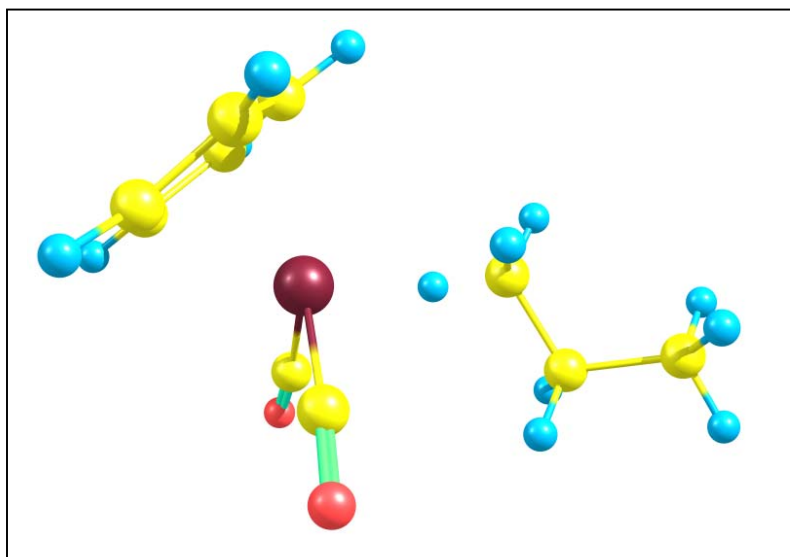



Butane:

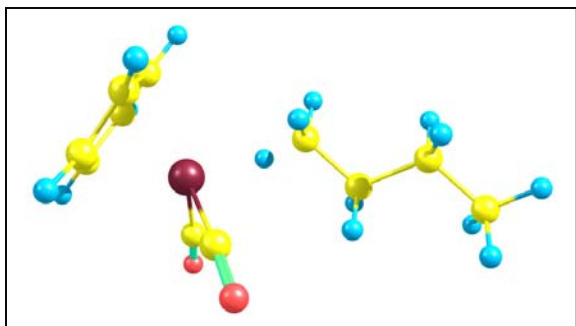

|    |           |           |           |
|----|-----------|-----------|-----------|
| C  | -1.849078 | -1.835422 | -0.118220 |
| C  | -2.505651 | -0.693810 | -0.721919 |
| C  | -2.748821 | 0.282082  | 0.315611  |
| C  | -2.246255 | -0.256113 | 1.564614  |
| C  | -1.668826 | -1.533548 | 1.272389  |
| H  | -1.165519 | -2.175785 | 1.999415  |
| H  | -1.553188 | -2.755407 | -0.622333 |
| H  | -2.817069 | -0.609159 | -1.763163 |
| H  | -3.280334 | 1.225641  | 0.191598  |
| H  | -2.290214 | 0.227366  | 2.540405  |
| Re | -0.540361 | 0.105095  | -0.005621 |
| C  | -0.250088 | 1.971702  | 0.214772  |
| O  | -0.170363 | 3.141985  | 0.363284  |
| C  | 0.212970  | 0.198651  | -1.748322 |
| O  | 0.610080  | 0.230412  | -2.862281 |
| C  | 1.901261  | -0.744645 | 0.785708  |
| C  | 3.156055  | -0.095688 | 0.185692  |
| C  | 4.367227  | -1.045592 | 0.193671  |
| H  | 2.066352  | -1.138234 | 1.805646  |
| H  | 1.529172  | -1.569106 | 0.160533  |
| H  | 1.129035  | 0.094217  | 1.01508   |
| H  | 2.940475  | 0.217751  | -0.852500 |
| H  | 3.403454  | 0.827599  | 0.745069  |
| H  | 4.584522  | -1.358728 | 1.234560  |
| H  | 4.110730  | -1.971936 | -0.358562 |
| C  | 5.620134  | -0.405441 | -0.425267 |
| H  | 5.914616  | 0.504971  | 0.127795  |
| H  | 6.477183  | -1.101900 | -0.410074 |
| H  | 5.439968  | -0.114328 | -1.476297 |

Pentane:

|    |           |           |           |
|----|-----------|-----------|-----------|
| C  | -1.832956 | -1.834151 | -0.172676 |
| C  | -2.486815 | -0.683840 | -0.762619 |
| C  | -2.751301 | 0.268819  | 0.290992  |
| C  | -2.265617 | -0.292669 | 1.536539  |
| C  | -1.677533 | -1.560893 | 1.227316  |
| H  | -1.183087 | -2.216153 | 1.948714  |
| H  | -1.525463 | -2.742721 | -0.690473 |
| H  | -2.778472 | -0.575767 | -1.807311 |
| H  | -3.283635 | 1.213142  | 0.177563  |
| H  | -2.323331 | 0.173274  | 2.519984  |
| Re | -0.537752 | 0.110899  | 0.001569  |
| C  | -0.267519 | 1.974553  | 0.267900  |
| O  | -0.202731 | 3.142594  | 0.439673  |
| C  | 0.240367  | 0.253676  | -1.726692 |
| O  | 0.653878  | 0.319309  | -2.833250 |
| C  | 1.897553  | -0.747167 | 0.805118  |
| C  | 3.152312  | -0.092203 | 0.211390  |
| C  | 4.375725  | -1.024511 | 0.256352  |
| H  | 2.059409  | -1.139757 | 1.825972  |
| H  | 1.530512  | -1.572831 | 0.178597  |
| H  | 1.120181  | 0.087412  | 1.033349  |
| H  | 2.947005  | 0.198845  | -0.835185 |
| H  | 3.378091  | 0.845054  | 0.756313  |
| H  | 4.596918  | -1.298331 | 1.308654  |
| H  | 4.138116  | -1.975066 | -0.263943 |
| C  | 5.629675  | -0.399392 | -0.382522 |
| H  | 5.845718  | 0.566662  | 0.114863  |
| H  | 5.412526  | -0.156395 | -1.441659 |
| C  | 6.861384  | -1.313240 | -0.302147 |
| H  | 7.734078  | -0.864123 | -0.808240 |
| H  | 7.146260  | -1.509331 | 0.748086  |
| H  | 6.663033  | -2.290740 | -0.780097 |

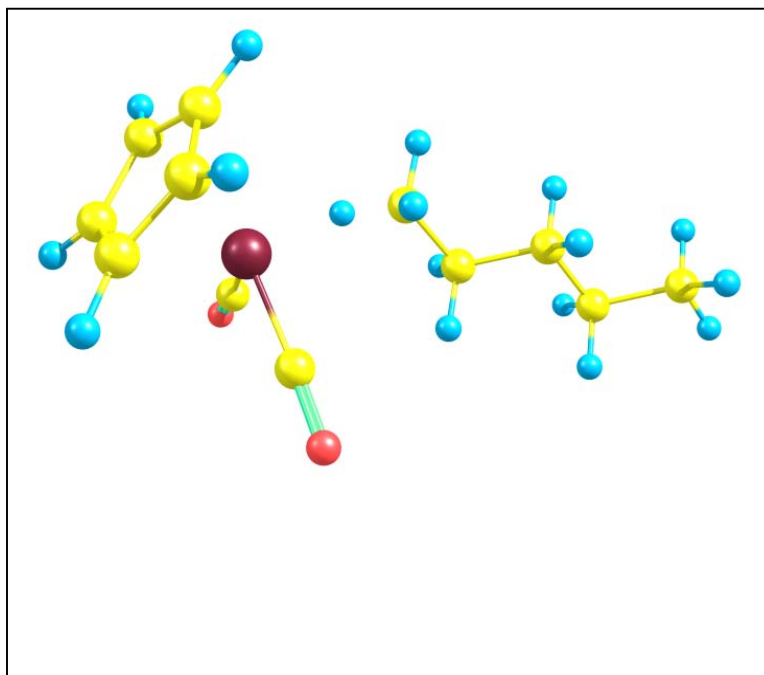

Hexane:

|    |           |           |           |
|----|-----------|-----------|-----------|
| C  | -2.813055 | -1.240780 | 1.189974  |
| C  | -3.441689 | -0.349241 | 0.236942  |
| C  | -3.012617 | -0.730206 | -1.088998 |
| C  | -2.119766 | -1.864975 | -0.958142 |
| C  | -1.983309 | -2.139488 | 0.440354  |
| H  | -2.953076 | -1.234468 | 2.270639  |
| H  | -4.161198 | 0.435867  | 0.470813  |
| H  | -3.361263 | -0.287212 | -2.021467 |
| H  | -1.631364 | -2.396202 | -1.774869 |
| H  | -1.332568 | -2.904304 | 0.871397  |
| Re | -1.253305 | 0.072804  | 0.038384  |
| C  | -1.411593 | 1.743805  | 0.931257  |
| O  | -1.619124 | 2.768141  | 1.485090  |
| C  | -0.502179 | 0.943274  | -1.478294 |
| O  | -0.112291 | 1.454789  | -2.470736 |
| C  | 1.232218  | -0.581929 | 0.815060  |
| H  | 1.291930  | -1.227554 | 1.708902  |
| H  | 0.386196  | 0.161409  | 1.100391  |
| H  | 1.043510  | -1.223673 | -0.059430 |
| C  | 2.501069  | 0.257148  | 0.602741  |
| H  | 2.666183  | 0.919616  | 1.474299  |
| H  | 2.355881  | 0.917870  | -0.271570 |
| C  | 3.734467  | -0.638268 | 0.383859  |
| H  | 3.864664  | -1.306006 | 1.260304  |
| H  | 3.547702  | -1.305428 | -0.482961 |
| C  | 5.032598  | 0.150792  | 0.145181  |
| H  | 5.230051  | 0.810842  | 1.014625  |
| H  | 4.898449  | 0.823986  | -0.725734 |
| C  | 6.251894  | -0.756911 | -0.097150 |
| H  | 6.382405  | -1.430591 | 0.773445  |
| H  | 6.043849  | -1.416760 | -0.963378 |
| C  | 7.550606  | 0.024416  | -0.346778 |
| H  | 8.399939  | -0.655544 | -0.536541 |
| H  | 7.452222  | 0.691342  | -1.223231 |
| H  | 7.813309  | 0.655292  | 0.522356  |

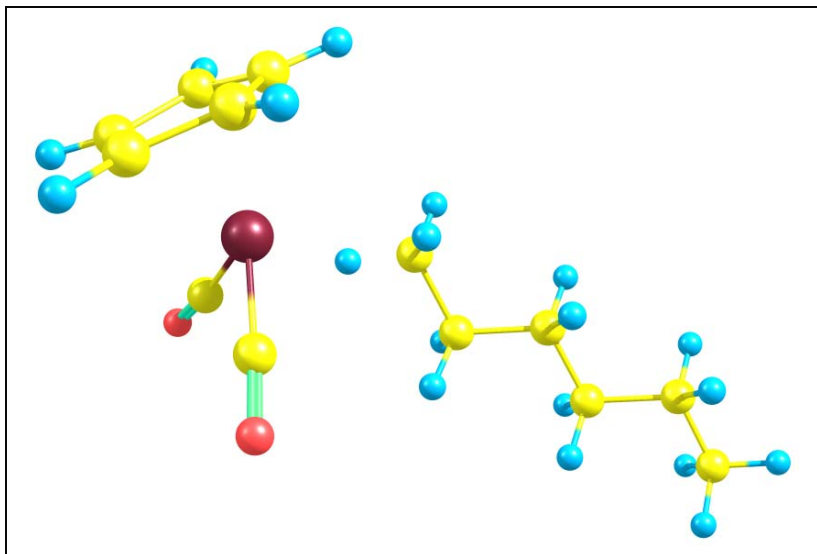

Heptane:

|    |           |           |           |
|----|-----------|-----------|-----------|
| C  | -4.489852 | -0.357103 | 0.160611  |
| C  | -3.917692 | -0.996200 | -1.002251 |
| C  | -2.983193 | -2.004648 | -0.542649 |
| C  | -2.970346 | -1.949383 | 0.888910  |
| C  | -3.910151 | -0.965725 | 1.341057  |
| H  | -4.145318 | -0.726098 | 2.378041  |
| H  | -2.330765 | -2.552457 | 1.537725  |
| H  | -2.400520 | -2.678598 | -1.170544 |
| H  | -4.188412 | -0.795124 | -2.039239 |
| H  | -5.270036 | 0.404353  | 0.147691  |
| Re | -2.314874 | 0.161594  | 0.045477  |
| C  | -2.611343 | 1.979677  | 0.523642  |
| O  | -2.891194 | 3.093282  | 0.805214  |
| C  | -1.505378 | 0.715325  | -1.582153 |
| O  | -1.071107 | 1.000108  | -2.645133 |
| C  | 0.141605  | -0.167012 | 1.079851  |
| C  | 1.370685  | 0.553236  | 0.507560  |
| C  | 2.637075  | -0.315266 | 0.627102  |
| C  | 3.892079  | 0.341422  | 0.025973  |
| C  | 5.146422  | -0.542392 | 0.141676  |
| C  | 6.408984  | 0.090079  | -0.470170 |
| C  | 7.653221  | -0.800762 | -0.330035 |
| H  | -0.742234 | 0.588528  | 1.107751  |
| H  | -0.038914 | -1.112500 | 0.545888  |
| H  | 0.245885  | -0.402823 | 2.154411  |
| H  | 1.523830  | 1.517457  | 1.029721  |
| H  | 1.183667  | 0.798037  | -0.553991 |
| H  | 2.458984  | -1.287375 | 0.123063  |
| H  | 2.822992  | -0.554095 | 1.694582  |
| H  | 4.076361  | 1.312959  | 0.527606  |
| H  | 3.704799  | 0.578813  | -1.040974 |
| H  | 4.954142  | -1.518317 | -0.349393 |
| H  | 5.335096  | -0.772900 | 1.210606  |
| H  | 6.593775  | 1.070232  | 0.011979  |
| H  | 6.226059  | 0.306223  | -1.541856 |
| H  | 8.536369  | -0.346320 | -0.813037 |
| H  | 7.903873  | -0.973728 | 0.732902  |
| H  | 7.486708  | -1.789800 | -0.796223 |

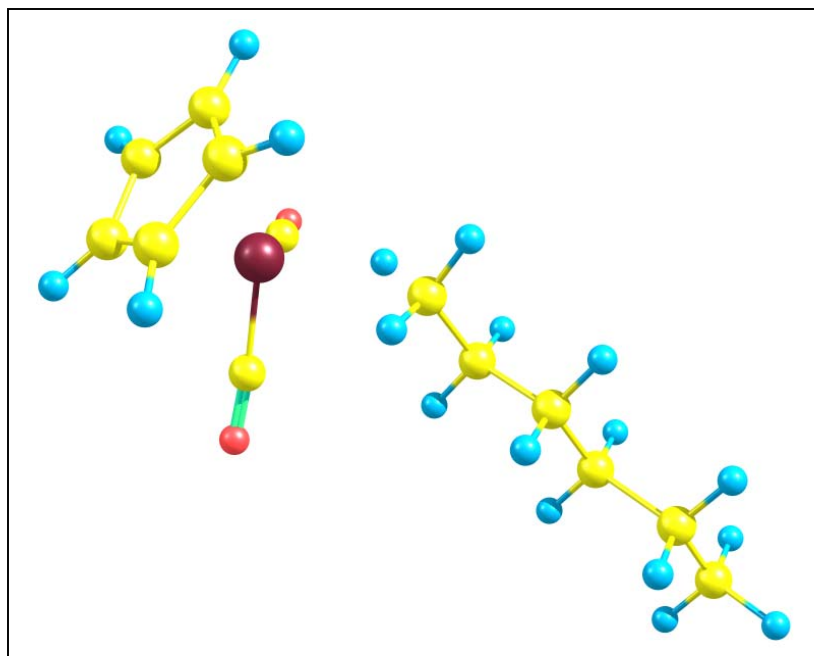

Cyclopropane:

|    |           |           |           |
|----|-----------|-----------|-----------|
| C  | -1.159114 | -0.192745 | -1.622706 |
| C  | -1.998106 | 0.668994  | -0.823104 |
| C  | -2.328972 | -0.047289 | 0.396419  |
| C  | -1.654826 | -1.304259 | 0.352227  |
| C  | -0.947461 | -1.422294 | -0.898800 |
| H  | -0.781201 | 0.035470  | -2.619819 |
| H  | -2.386237 | 1.642292  | -1.122352 |
| H  | -2.950747 | 0.323215  | 1.211770  |
| H  | -1.673648 | -2.060978 | 1.140035  |
| H  | -0.388256 | -2.291241 | -1.244739 |
| Re | -0.036017 | 0.415386  | 0.233649  |
| C  | 1.514206  | 0.921067  | -0.741529 |
| O  | 2.427199  | 1.225078  | -1.430482 |
| C  | -0.068526 | 2.123144  | 1.075197  |
| O  | -0.174686 | 3.191381  | 1.568279  |
| C  | 1.233982  | -0.382684 | 2.337357  |
| C  | 2.217212  | 0.622615  | 2.897742  |
| C  | 2.622356  | -0.823269 | 2.842530  |
| H  | 0.372515  | -0.683427 | 2.935101  |
| H  | 2.684738  | 1.317053  | 2.193894  |
| H  | 1.964132  | 1.063958  | 3.867197  |
| H  | 3.362107  | -1.124296 | 2.093249  |
| H  | 2.642269  | -1.410244 | 3.766636  |
| H  | 1.231279  | -0.652018 | 1.212393  |

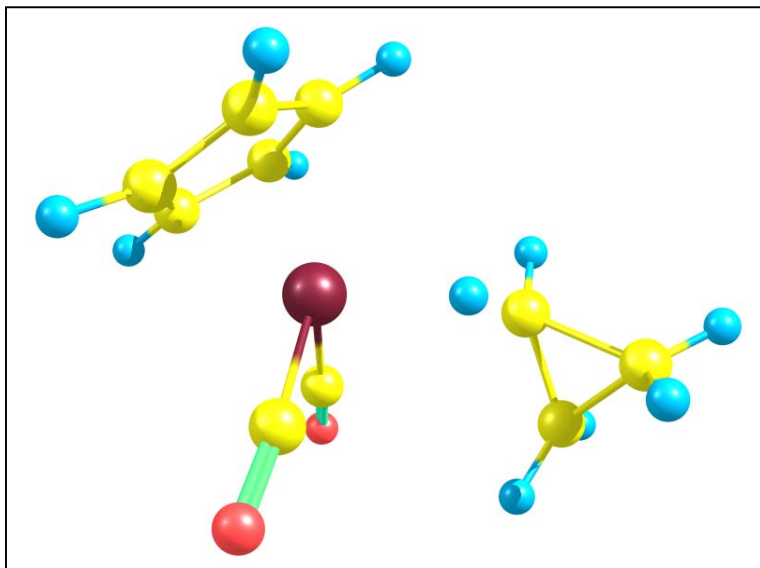

Cyclobutane:

|    |           |           |           |
|----|-----------|-----------|-----------|
| C  | -0.839294 | 0.251063  | -1.629880 |
| C  | -1.927392 | 0.532517  | -0.722558 |
| C  | -2.240778 | -0.694285 | -0.013519 |
| C  | -1.318679 | -1.691753 | -0.456113 |
| C  | -0.467634 | -1.136791 | -1.475538 |
| H  | -0.402683 | 0.958597  | -2.335930 |
| H  | -2.468207 | 1.475896  | -0.646440 |
| H  | -3.016764 | -0.821273 | 0.741420  |
| H  | -1.263596 | -2.714473 | -0.076642 |
| H  | 0.305724  | -1.666495 | -2.031126 |
| Re | -0.088590 | 0.089199  | 0.485320  |
| C  | 1.471806  | 1.102656  | 0.101410  |
| O  | 2.404187  | 1.747370  | -0.237166 |
| C  | -0.532471 | 1.286797  | 1.895726  |
| O  | -0.896091 | 2.054723  | 2.718018  |
| C  | 2.258278  | -2.246429 | 3.980853  |
| C  | 1.750455  | -0.819400 | 3.607925  |
| C  | 1.025046  | -1.457070 | 2.397535  |
| C  | 1.951368  | -2.709276 | 2.522623  |
| H  | 3.301047  | -2.339993 | 4.327984  |
| H  | 2.574524  | -0.160756 | 3.284856  |
| H  | 1.126301  | -0.275904 | 4.335549  |
| H  | 1.242954  | -0.955288 | 1.365616  |
| H  | -0.026211 | -1.698304 | 2.604010  |
| H  | 2.840184  | -2.629404 | 1.873010  |
| H  | 1.488634  | -3.699479 | 2.372861  |
| H  | 1.594453  | -2.739177 | 4.712413  |

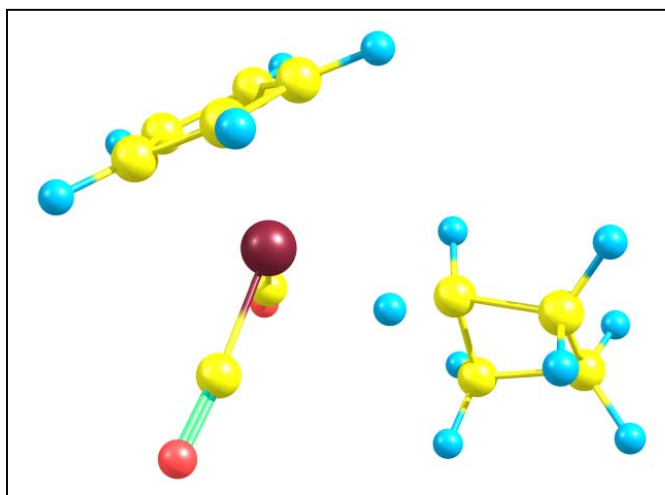

Cyclopentane:

|    |           |           |           |
|----|-----------|-----------|-----------|
| C  | -1.311817 | 0.188867  | -1.689342 |
| C  | -2.090658 | 0.836050  | -0.658556 |
| C  | -2.340307 | -0.133334 | 0.389133  |
| C  | -1.683788 | -1.349836 | 0.006995  |
| C  | -1.081093 | -1.182338 | -1.282303 |
| H  | -1.011766 | 0.636679  | -2.636996 |
| H  | -2.477537 | 1.854913  | -0.697243 |
| H  | -2.904358 | 0.034817  | 1.306329  |
| H  | -1.642648 | -2.260665 | 0.608461  |
| H  | -0.539105 | -1.941885 | -1.845241 |
| Re | -0.059302 | 0.350748  | 0.160191  |
| C  | 1.534329  | 0.739561  | -0.803072 |
| O  | 2.469581  | 0.975429  | -1.487434 |
| C  | 0.100685  | 1.997212  | 1.100100  |
| O  | 0.112539  | 3.043838  | 1.650320  |
| C  | 3.172167  | -1.089681 | 3.732658  |
| C  | 2.161370  | -2.242051 | 3.943161  |
| C  | 1.379695  | -2.286512 | 2.613563  |
| C  | 1.175239  | -0.781087 | 2.300147  |
| C  | 2.417383  | -0.034789 | 2.868584  |
| H  | 4.054255  | -1.468573 | 3.184630  |
| H  | 2.645869  | -3.203771 | 4.187484  |
| H  | 1.469524  | -1.997748 | 4.772417  |
| H  | 1.995954  | -2.767340 | 1.829688  |
| H  | 0.427238  | -2.841475 | 2.676128  |
| H  | 0.246779  | -0.424446 | 2.768616  |
| H  | 1.189473  | -0.710280 | 1.134584  |
| H  | 2.093816  | 0.833739  | 3.466585  |
| H  | 3.051904  | 0.358368  | 2.056948  |
| H  | 3.539058  | -0.670245 | 4.685304  |

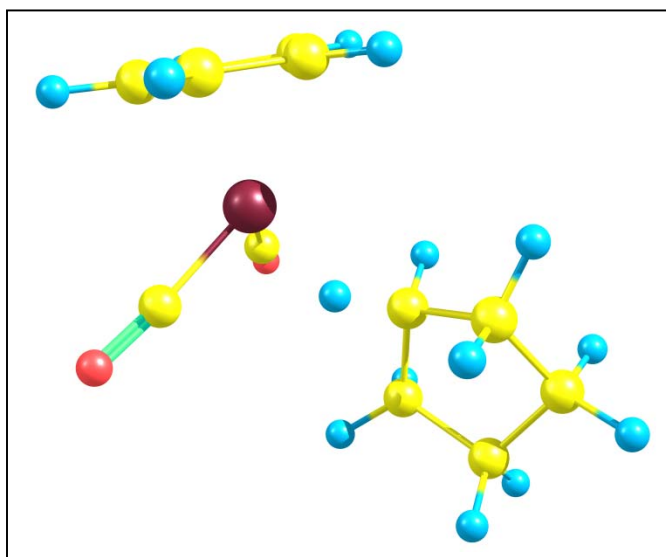

Cyclohexane:

|    |           |           |           |
|----|-----------|-----------|-----------|
| C  | 0.711664  | 0.551156  | -2.100247 |
| C  | -0.549137 | 0.598736  | -1.399132 |
| C  | -0.892457 | -0.753408 | -1.004882 |
| C  | 0.173478  | -1.606602 | -1.440292 |
| C  | 1.152187  | -0.828319 | -2.143439 |
| H  | 1.210140  | 1.399096  | -2.570389 |
| H  | -1.156276 | 1.490171  | -1.242935 |
| H  | -1.795155 | -1.060766 | -0.476675 |
| H  | 0.239989  | -2.680901 | -1.253768 |
| H  | 2.055179  | -1.199838 | -2.626923 |
| Re | 1.061989  | 0.005692  | 0.046235  |
| C  | 2.677013  | 1.004534  | 0.140812  |
| O  | 3.666106  | 1.651791  | 0.101260  |
| C  | 0.306439  | 1.016538  | 1.467540  |
| O  | -0.246578 | 1.673156  | 2.281418  |
| C  | 2.689032  | -3.062908 | 1.250277  |
| C  | 2.408612  | -4.415841 | 1.936066  |
| C  | 2.442835  | -4.288664 | 3.470868  |
| C  | 1.480906  | -3.192892 | 3.968567  |
| C  | 1.753363  | -1.833630 | 3.292493  |
| C  | 1.711850  | -1.987584 | 1.759156  |
| H  | 3.727142  | -2.742531 | 1.471348  |
| H  | 1.409814  | -4.784452 | 1.622618  |
| H  | 3.142806  | -5.169258 | 1.594009  |
| H  | 2.186508  | -5.257871 | 3.938836  |
| H  | 3.475990  | -4.050205 | 3.795491  |
| H  | 0.436808  | -3.501662 | 3.754100  |
| H  | 1.553535  | -3.085428 | 5.067099  |
| H  | 2.751679  | -1.459332 | 3.594817  |
| H  | 1.015642  | -1.079468 | 3.618158  |
| H  | 0.680930  | -2.232644 | 1.450404  |
| H  | 2.101240  | -0.968270 | 1.349520  |
| H  | 2.618265  | -3.156887 | 0.151449  |

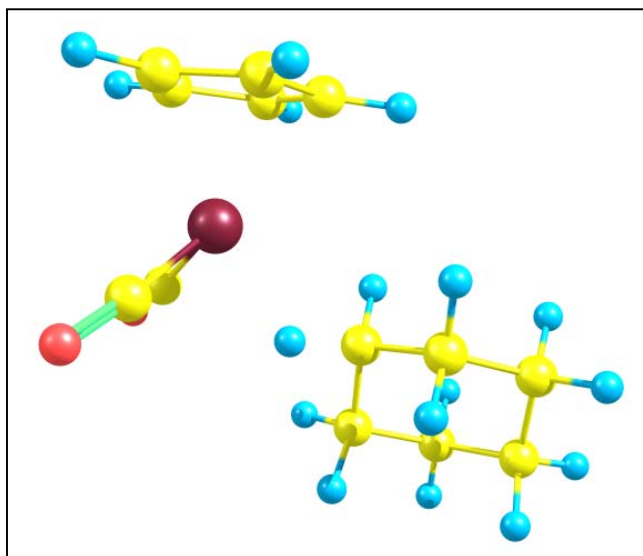



#### 4-1d. Mononuclear Re, SOS-MP2.

Methane:

|    |           |           |           |
|----|-----------|-----------|-----------|
| C  | -1.902915 | -1.215819 | -.242486  |
| C  | -1.551871 | -.479469  | -1.431269 |
| C  | -1.647280 | .918851   | -1.130419 |
| C  | -2.051733 | 1.054996  | .245157   |
| C  | -2.182475 | -.261245  | .776710   |
| H  | -1.972401 | -2.293208 | -.151633  |
| H  | -1.348523 | -.903839  | -2.407031 |
| H  | -1.519786 | 1.727958  | -1.839565 |
| H  | -2.252445 | 1.981981  | .768403   |
| H  | -2.455392 | -.497295  | 1.800840  |
| Re | .051269   | .044322   | .039668   |
| C  | 1.166181  | 1.536293  | -.285967  |
| O  | 1.793915  | 2.494494  | -.560467  |
| C  | 1.347462  | -1.068120 | -.771238  |
| O  | 2.100556  | -1.769245 | -1.343556 |
| C  | 1.015918  | -.747073  | 2.432654  |
| H  | 2.042615  | -1.109247 | 2.383751  |
| H  | .781177   | -.367275  | 3.430478  |
| H  | .970581   | .196589   | 1.805806  |
| H  | .326665   | -1.551647 | 2.179408  |

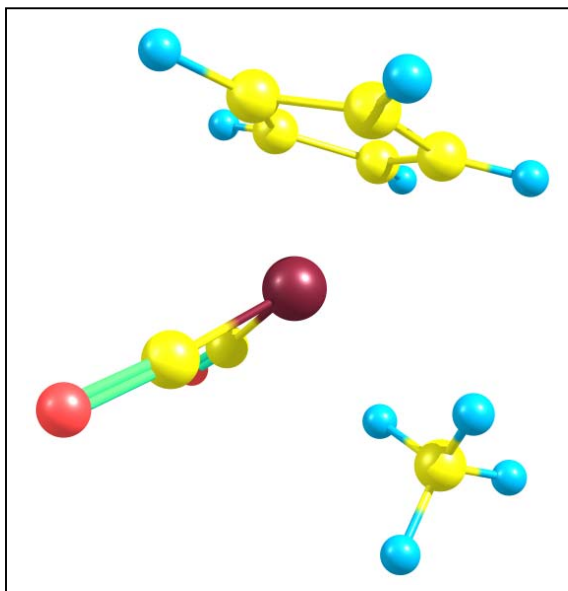

Ethane:

|    |           |           |           |
|----|-----------|-----------|-----------|
| C  | -1.750931 | -1.818941 | -.172473  |
| C  | -2.452963 | -.691894  | -.733198  |
| C  | -2.731929 | .229728   | .328547   |
| C  | -2.202613 | -.320447  | 1.550121  |
| C  | -1.586637 | -1.562533 | 1.219261  |
| H  | -1.074896 | -2.213490 | 1.921594  |
| H  | -1.437042 | -2.709240 | -.704141  |
| H  | -2.794102 | -.598723  | -1.757253 |
| H  | -3.314730 | 1.138748  | .239508   |
| H  | -2.283140 | .113786   | 2.539262  |
| Re | -.514645  | .163344   | -.002809  |
| C  | -.331438  | 2.032253  | .208139   |
| O  | -.318433  | 3.203807  | .331612   |
| C  | .221517   | .313085   | -1.735762 |
| O  | .606285   | .390635   | -2.847022 |
| C  | 1.900901  | -.653313  | .870425   |
| C  | 3.155303  | -.128553  | .169234   |
| C  | 4.296963  | -1.147985 | .220260   |
| H  | 2.087621  | -.914040  | 1.919387  |
| H  | 1.505182  | -1.539843 | .369915   |
| H  | 1.175041  | .219489   | .987118   |
| H  | 2.908542  | .108377   | -.871066  |
| H  | 3.470187  | .810488   | .641796   |
| H  | 4.573319  | -1.381154 | 1.255470  |
| H  | 5.188098  | -.763138  | -.287380  |
| H  | 4.007919  | -2.084317 | -.271765  |

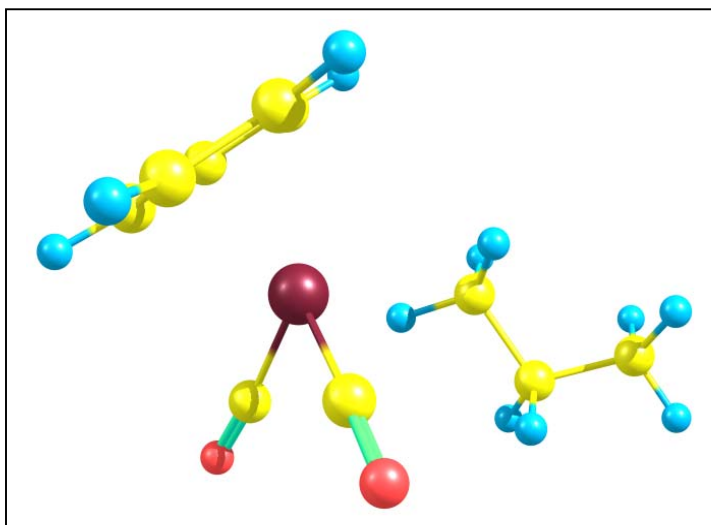

Propane:

|    |           |           |           |
|----|-----------|-----------|-----------|
| C  | -1.750931 | -1.818941 | -.172473  |
| C  | -2.452963 | -.691894  | -.733198  |
| C  | -2.731929 | .229728   | .328547   |
| C  | -2.202613 | -.320447  | 1.550121  |
| C  | -1.586637 | -1.562533 | 1.219261  |
| H  | -1.074896 | -2.213490 | 1.921594  |
| H  | -1.437042 | -2.709240 | -.704141  |
| H  | -2.794102 | -.598723  | -1.757253 |
| H  | -3.314730 | 1.138748  | .239508   |
| H  | -2.283140 | .113786   | 2.539262  |
| Re | -.514645  | .163344   | -.002809  |
| C  | -.331438  | 2.032253  | .208139   |
| O  | -.318433  | 3.203807  | .331612   |
| C  | .221517   | .313085   | -1.735762 |
| O  | .606285   | .390635   | -2.847022 |
| C  | 1.900901  | -.653313  | .870425   |
| C  | 3.155303  | -.128553  | .169234   |
| C  | 4.296963  | -1.147985 | .220260   |
| H  | 2.087621  | -.914040  | 1.919387  |
| H  | 1.505182  | -1.539843 | .369915   |
| H  | 1.175041  | .219489   | .987118   |
| H  | 2.908542  | .108377   | -.871066  |
| H  | 3.470187  | .810488   | .641796   |
| H  | 4.573319  | -1.381154 | 1.255470  |
| H  | 5.188098  | -.763138  | -.287380  |
| H  | 4.007919  | -2.084317 | -.271765  |

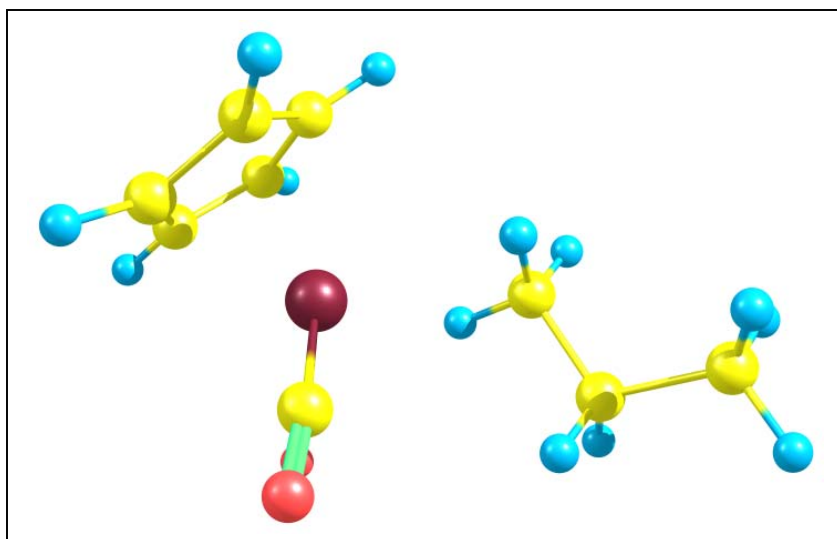

Butane:

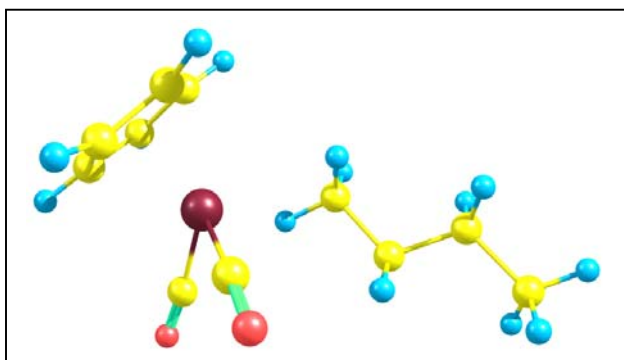

|    |           |           |           |
|----|-----------|-----------|-----------|
| C  | -1.721698 | -1.829769 | -.182235  |
| C  | -2.436698 | -.711485  | -.744144  |
| C  | -2.735571 | .202931   | .318430   |
| C  | -2.205629 | -.342948  | 1.541673  |
| C  | -1.569694 | -1.575036 | 1.211187  |
| H  | -1.052646 | -2.220365 | 1.914825  |
| H  | -1.391347 | -2.713726 | -.714521  |
| H  | -2.773143 | -.620517  | -1.769946 |
| H  | -3.331315 | 1.103423  | .228402   |
| H  | -2.298490 | .087227   | 2.531507  |
| Re | -.515524  | .169991   | .000318   |
| C  | -.360446  | 2.040626  | .217614   |
| O  | -.364814  | 3.211931  | .344357   |
| C  | .229701   | .335697   | -1.727126 |
| O  | .621588   | .422622   | -2.835284 |
| C  | 1.904283  | -.615103  | .884330   |
| C  | 3.151907  | -.072810  | .185147   |
| C  | 4.313485  | -1.071354 | .230704   |
| H  | 2.091950  | -.874019  | 1.933541  |
| H  | 1.520857  | -1.506314 | .382637   |
| H  | 1.166471  | .247909   | 1.001454  |
| H  | 2.904882  | .161900   | -.856669  |
| H  | 3.456424  | .870628   | .658331   |
| H  | 4.551628  | -1.307896 | 1.277392  |
| H  | 3.997687  | -2.013965 | -.238353  |
| C  | 5.565954  | -.542324  | -.474624  |
| H  | 5.917479  | .383674   | -.004941  |
| H  | 6.382398  | -1.271951 | -.433931  |
| H  | 5.357791  | -.326350  | -1.528787 |

Pentane:

|    |           |           |           |
|----|-----------|-----------|-----------|
| C  | 3.142821  | -.924488  | .795877   |
| C  | 3.564321  | -.076526  | -.280197  |
| C  | 3.010912  | -.596705  | -1.504044 |
| C  | 2.240270  | -1.746251 | -1.161402 |
| C  | 2.329004  | -1.977142 | .241255   |
| H  | 3.460970  | -.841512  | 1.828159  |
| H  | 4.248962  | .758933   | -.195353  |
| H  | 3.174714  | -.206576  | -2.501230 |
| H  | 1.676300  | -2.353107 | -1.863222 |
| H  | 1.892863  | -2.806134 | .785690   |
| Re | 1.345530  | .132419   | -.024980  |
| C  | .570129   | .413558   | 1.674105  |
| O  | .156275   | .566000   | 2.767105  |
| C  | 1.396719  | 2.003648  | -.282131  |
| O  | 1.529047  | 3.164909  | -.430800  |
| C  | -1.119377 | -.404433  | -.968028  |
| C  | -2.314355 | .307047   | -.331267  |
| C  | -3.584514 | -.548379  | -.386450  |
| C  | -4.793850 | .142227   | .253529   |
| C  | -6.060920 | -.716773  | .202101   |
| H  | -.859590  | -1.315031 | -.423825  |
| H  | -.281050  | .361057   | -1.089331 |
| H  | -1.304352 | -.678574  | -2.013858 |
| H  | -2.073289 | .548079   | .710426   |
| H  | -2.487973 | 1.262214  | -.845180  |
| H  | -3.817948 | -.794148  | -1.433231 |
| H  | -3.400769 | -1.505184 | .124853   |
| H  | -4.975771 | 1.097955  | -.257114  |
| H  | -4.556937 | .388351   | 1.297596  |
| H  | -6.909767 | -.201340  | .665220   |
| H  | -5.913063 | -1.664778 | .732687   |
| H  | -6.333985 | -.951029  | -.833680  |

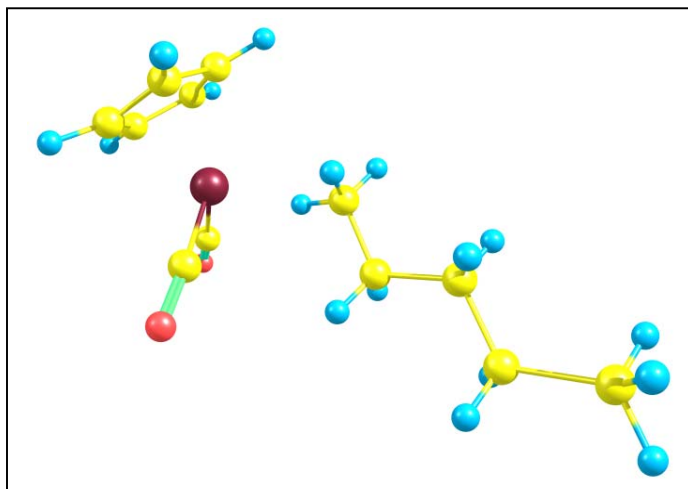

Hexane:

|    |           |           |           |
|----|-----------|-----------|-----------|
| C  | -2.895754 | -1.109583 | 1.166780  |
| C  | -3.403568 | -.182594  | .188626   |
| C  | -2.962843 | -.613179  | -1.105668 |
| C  | -2.184320 | -1.814457 | -.934104  |
| C  | -2.133934 | -2.088105 | .462277   |
| H  | -3.084843 | -1.087850 | 2.233152  |
| H  | -4.071781 | .647504   | .384585   |
| H  | -3.249179 | -.168809  | -2.051315 |
| H  | -1.744895 | -2.412998 | -1.723111 |
| H  | -1.601803 | -2.916044 | .920799   |
| Re | -1.175057 | .044815   | .073086   |
| C  | -1.206474 | 1.717484  | .951209   |
| O  | -1.325954 | 2.762301  | 1.482524  |
| C  | -.335488  | .866257   | -1.406237 |
| O  | .117324   | 1.371984  | -2.369716 |
| C  | 1.255560  | -.825257  | .848053   |
| H  | 1.399335  | -1.472279 | 1.722051  |
| H  | .401855   | -.158807  | 1.209517  |
| H  | 1.032030  | -1.464052 | -.009089  |
| C  | 2.464877  | .072162   | .581082   |
| H  | 2.598346  | .765454   | 1.422625  |
| H  | 2.266028  | .685834   | -.305068  |
| C  | 3.747027  | -.741071  | .373064   |
| H  | 3.933452  | -1.367035 | 1.258455  |
| H  | 3.606440  | -1.430604 | -.472645  |
| C  | 4.971379  | .142313   | .109294   |
| H  | 5.112260  | .829516   | .956447   |
| H  | 4.781054  | .771914   | -.771970  |
| C  | 6.257802  | -.661337  | -.109664  |
| H  | 6.443526  | -1.294138 | .769568   |
| H  | 6.117233  | -1.344427 | -.958988  |
| C  | 7.476484  | .230691   | -.365595  |
| H  | 8.382326  | -.366394  | -.520468  |
| H  | 7.326260  | .851955   | -1.256297 |
| H  | 7.656041  | .900689   | .483477   |

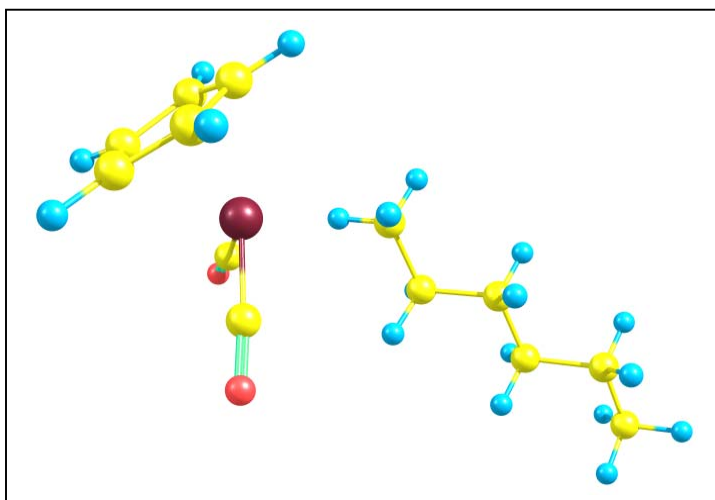

Heptane:

|    |           |           |           |
|----|-----------|-----------|-----------|
| C  | -4.487896 | -.171675  | .155799   |
| C  | -3.989415 | -.941399  | -.945780  |
| C  | -3.165320 | -1.998072 | -.414757  |
| C  | -3.148429 | -1.847277 | 1.001697  |
| C  | -3.973195 | -.745409  | 1.372687  |
| H  | -4.194771 | -.419431  | 2.381689  |
| H  | -2.596018 | -2.475817 | 1.693565  |
| H  | -2.677160 | -2.779739 | -.984439  |
| H  | -4.262648 | -.807685  | -1.985591 |
| H  | -5.196335 | .645180   | .086717   |
| Re | -2.268313 | .122187   | .017922   |
| C  | -2.392379 | 1.971203  | .387061   |
| O  | -2.568980 | 3.116250  | .600921   |
| C  | -1.433192 | .534519   | -1.625297 |
| O  | -.980310  | .767864   | -2.688099 |
| C  | .167585   | -.398744  | 1.040336  |
| C  | 1.371838  | .372293   | .497332   |
| C  | 2.661436  | -.451435  | .580943   |
| C  | 3.881594  | .299707   | .036547   |
| C  | 5.175265  | -.517720  | .120526   |
| C  | 6.397360  | .230167   | -.423589  |
| C  | 7.685801  | -.593214  | -.331845  |
| H  | -.694586  | .340103   | 1.159382  |
| H  | -.042886  | -1.286386 | .439781   |
| H  | .311150   | -.721012  | 2.078914  |
| H  | 1.492333  | 1.307323  | 1.061047  |
| H  | 1.176349  | .654059   | -.543752  |
| H  | 2.530981  | -1.388481 | .019318   |
| H  | 2.847027  | -.737968  | 1.626853  |
| H  | 4.007793  | 1.239179  | .594252   |
| H  | 3.695396  | .582687   | -1.009561 |
| H  | 5.048532  | -1.458197 | -.435949  |
| H  | 5.359991  | -.800435  | 1.167604  |
| H  | 6.521871  | 1.170768  | .130847   |
| H  | 6.213249  | .510010   | -1.470124 |
| H  | 8.543561  | -.037382  | -.727226  |
| H  | 7.907548  | -.858470  | .708715   |
| H  | 7.596452  | -1.524850 | -.903059  |

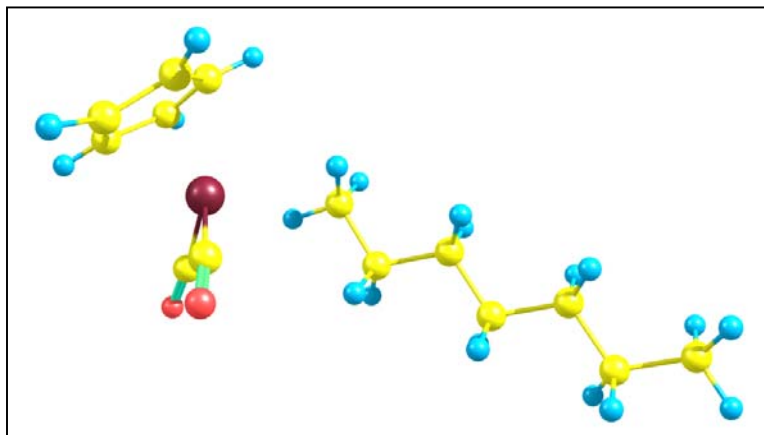

Cyclopropane:

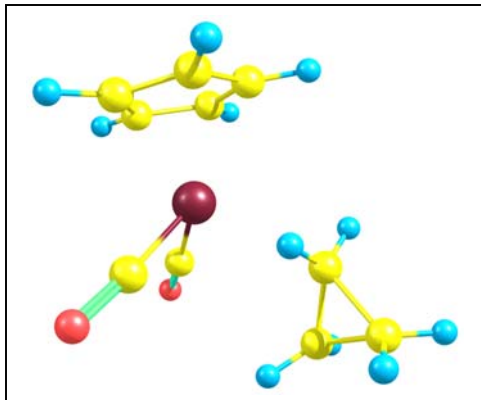

|    |           |           |           |
|----|-----------|-----------|-----------|
| C  | -1.190490 | -.145956  | -1.608051 |
| C  | -1.997465 | .680561   | -.758408  |
| C  | -2.289312 | -.071912  | .438567   |
| C  | -1.621258 | -1.319469 | .329535   |
| C  | -.951866  | -1.391781 | -.933563  |
| H  | -.864018  | .108494   | -2.609591 |
| H  | -2.418071 | 1.642809  | -1.023823 |
| H  | -2.904723 | .256576   | 1.267830  |
| H  | -1.622853 | -2.100901 | 1.083290  |
| H  | -.418973  | -2.247541 | -1.329615 |
| Re | -.002527  | .407407   | .219603   |
| C  | 1.516012  | .886738   | -.791808  |
| O  | 2.412089  | 1.189915  | -1.496410 |
| C  | .036440   | 2.124340  | 1.011434  |
| O  | .004476   | 3.209082  | 1.466963  |
| C  | 1.234272  | -.433204  | 2.325111  |
| C  | 2.137959  | .628943   | 2.898550  |
| C  | 2.602927  | -.790926  | 2.912475  |
| H  | .368014   | -.755783  | 2.890214  |
| H  | 2.605848  | 1.314733  | 2.200245  |
| H  | 1.816457  | 1.082445  | 3.832162  |
| H  | 3.385011  | -1.082545 | 2.216955  |
| H  | 2.599769  | -1.337309 | 3.851518  |
| H  | 1.286477  | -.699806  | 1.226960  |

Cyclobutane:

|    |           |           |           |
|----|-----------|-----------|-----------|
| C  | -0.916317 | .330546   | -1.579338 |
| C  | -1.939153 | .520676   | -.594154  |
| C  | -2.180746 | -.747626  | .047391   |
| C  | -1.280636 | -1.688767 | -.526635  |
| C  | -.510703  | -1.049446 | -1.544787 |
| H  | -.563421  | 1.080870  | -2.276835 |
| H  | -2.499407 | 1.433674  | -.431866  |
| H  | -2.922700 | -.949585  | .810772   |
| H  | -1.197361 | -2.733152 | -.241867  |
| H  | .217322   | -1.523023 | -2.192125 |
| Re | -.014880  | .049429   | .464002   |
| C  | 1.544456  | 1.028837  | .040686   |
| O  | 2.472595  | 1.672466  | -.295988  |
| C  | -.333004  | 1.254924  | 1.884402  |
| O  | -.591352  | 2.037652  | 2.726137  |
| C  | 2.162282  | -2.167826 | 4.038277  |
| C  | 1.642397  | -.792997  | 3.541134  |
| C  | 1.008689  | -1.525286 | 2.343412  |
| C  | 1.983308  | -2.713366 | 2.596337  |
| H  | 3.167312  | -2.207669 | 4.470311  |
| H  | 2.460312  | -.142479  | 3.213361  |
| H  | .970612   | -.220373  | 4.186675  |
| H  | 1.248387  | -1.116971 | 1.298480  |
| H  | -.028757  | -1.814850 | 2.513590  |
| H  | 2.902389  | -2.609766 | 2.009316  |
| H  | 1.587177  | -3.725892 | 2.467342  |
| H  | 1.457769  | -2.636732 | 4.734186  |

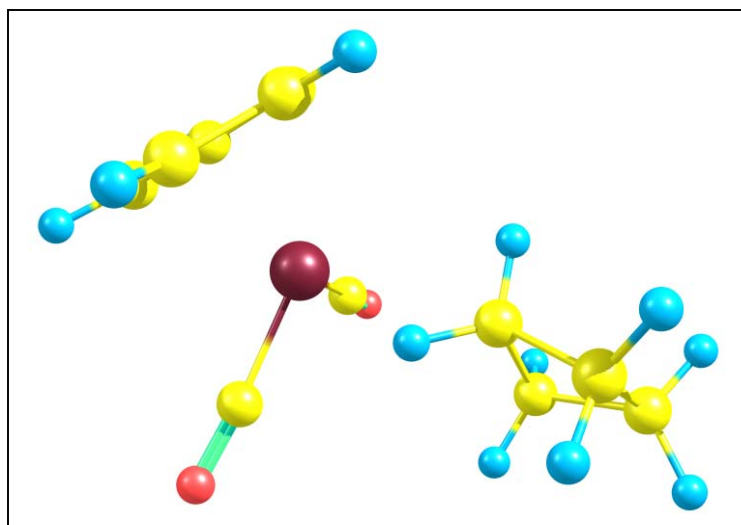



Cyclopentane:

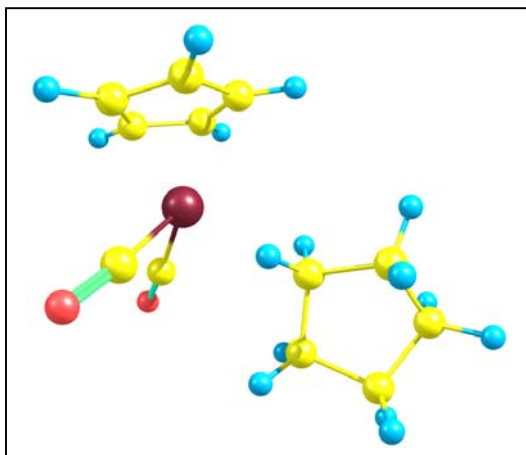

|    |           |           |           |
|----|-----------|-----------|-----------|
| C  | -1.316083 | .155719   | -1.655108 |
| C  | -2.017963 | .891229   | -.644826  |
| C  | -2.309367 | -.012215  | .440887   |
| C  | -1.751807 | -1.275741 | .099994   |
| C  | -1.154945 | -1.198105 | -1.195206 |
| H  | -1.023225 | .537585   | -2.625953 |
| H  | -2.360439 | 1.915463  | -.730601  |
| H  | -2.865263 | .224046   | 1.340476  |
| H  | -1.780669 | -2.164119 | .723459   |
| H  | -.701833  | -2.014913 | -1.743707 |
| Re | -.003920  | .322136   | .162998   |
| C  | 1.532056  | .720461   | -.858990  |
| O  | 2.432851  | .984388   | -1.572142 |
| C  | .239470   | 1.946688  | 1.099271  |
| O  | .322665   | 2.990076  | 1.639722  |
| C  | 3.081432  | -1.008766 | 3.782223  |
| C  | 2.185640  | -2.253801 | 3.905264  |
| C  | 1.528320  | -2.349149 | 2.521734  |
| C  | 1.174280  | -.875523  | 2.228013  |
| C  | 2.278218  | -.021101  | 2.896721  |
| H  | 4.017790  | -1.284668 | 3.281018  |
| H  | 2.742028  | -3.157619 | 4.179243  |
| H  | 1.413468  | -2.092898 | 4.670130  |
| H  | 2.254723  | -2.723359 | 1.787984  |
| H  | .651593   | -3.006710 | 2.491150  |
| H  | .190499   | -.648662  | 2.643660  |
| H  | 1.249397  | -.797950  | 1.087788  |
| H  | 1.824286  | .781543   | 3.487610  |
| H  | 2.912827  | .459196   | 2.144933  |
| H  | 3.348449  | -.579067  | 4.754093  |

# Cyclohexane

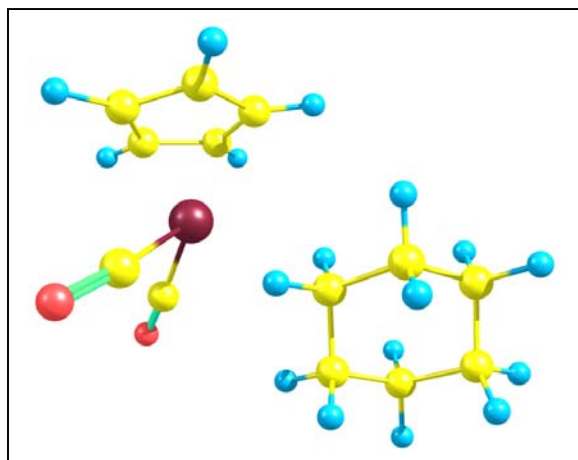

|    |           |           |           |
|----|-----------|-----------|-----------|
| C  | .695824   | .636109   | -2.047673 |
| C  | -.559827  | .567508   | -1.360513 |
| C  | -.823214  | -.815634  | -1.052105 |
| C  | .283121   | -1.572826 | -1.532268 |
| C  | 1.216550  | -.701669  | -2.166668 |
| H  | 1.132119  | 1.529380  | -2.478605 |
| H  | -1.233025 | 1.398621  | -1.188105 |
| H  | -1.711252 | -1.208168 | -.571145  |
| H  | .396869   | -2.648211 | -1.435950 |
| H  | 2.129633  | -.994205  | -2.670829 |
| Re | 1.072373  | -.007994  | .068253   |
| C  | 2.596049  | 1.095028  | .235564   |
| O  | 3.518042  | 1.828764  | .256208   |
| C  | .289225   | .887643   | 1.534552  |
| O  | -.252840  | 1.476852  | 2.399586  |
| C  | 2.610705  | -3.205730 | 1.218780  |
| C  | 2.290979  | -4.480577 | 2.011416  |
| C  | 2.421733  | -4.242319 | 3.521817  |
| C  | 1.532906  | -3.078311 | 3.980173  |
| C  | 1.844103  | -1.793287 | 3.200256  |
| C  | 1.725820  | -2.044772 | 1.692680  |
| H  | 3.666592  | -2.935907 | 1.365156  |
| H  | 1.263771  | -4.802018 | 1.782247  |
| H  | 2.955243  | -5.294910 | 1.693223  |
| H  | 2.164024  | -5.156656 | 4.072371  |
| H  | 3.470564  | -4.013665 | 3.761841  |
| H  | .476418   | -3.345919 | 3.828672  |
| H  | 1.661037  | -2.900642 | 5.055905  |
| H  | 2.866839  | -1.460282 | 3.429148  |
| H  | 1.169165  | -.983035  | 3.497375  |
| H  | .680731   | -2.246614 | 1.435599  |
| H  | 2.179484  | -1.124647 | 1.184327  |
| H  | 2.471775  | -3.370398 | .142572   |

#### 4-1e. Mononuclear Re, RIMP2.

Methane:

|    |           |           |           |
|----|-----------|-----------|-----------|
| C  | -1.892969 | -1.217253 | -.233166  |
| C  | -1.521388 | -.481497  | -1.411445 |
| C  | -1.617329 | .916426   | -1.108480 |
| C  | -2.040846 | 1.049999  | .257357   |
| C  | -2.167055 | -.265340  | .787393   |
| H  | -1.963279 | -2.293737 | -.144280  |
| H  | -1.321483 | -.902949  | -2.387963 |
| H  | -1.489871 | 1.725153  | -1.816472 |
| H  | -2.242904 | 1.975198  | .781098   |
| H  | -2.458490 | -.502301  | 1.804957  |
| Re | .044305   | .035816   | .064492   |
| C  | 1.157220  | 1.507986  | -.277777  |
| O  | 1.789745  | 2.466423  | -.571971  |
| C  | 1.337830  | -1.058377 | -.743417  |
| O  | 2.100605  | -1.755259 | -1.323287 |
| C  | .987545   | -.738628  | 2.384953  |
| H  | 2.003844  | -1.116565 | 2.307303  |
| H  | .784104   | -.361061  | 3.388715  |
| H  | .944639   | .236350   | 1.790491  |
| H  | .277291   | -1.528384 | 2.150741  |

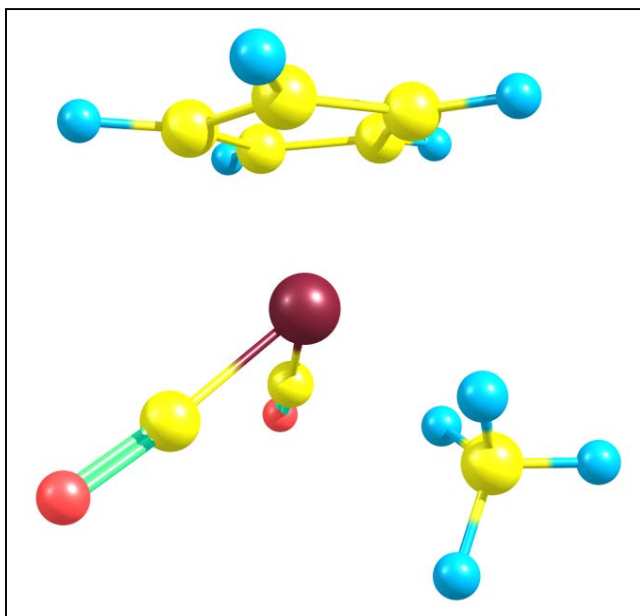

Ethane:

|    |           |           |           |
|----|-----------|-----------|-----------|
| C  | 1.597655  | -1.491673 | .820099   |
| C  | 1.974506  | -.112631  | .975345   |
| C  | 2.182913  | .438272   | -.331706  |
| C  | 1.926061  | -.592313  | -1.298010 |
| C  | 1.530777  | -1.755175 | -.575180  |
| H  | 1.406540  | -2.198075 | 1.617730  |
| H  | 2.182329  | .388505   | 1.911791  |
| H  | 2.559663  | 1.430391  | -.544930  |
| H  | 2.030878  | -.508508  | -2.371813 |
| H  | 1.255432  | -2.704603 | -1.021422 |
| Re | .026749   | -.028835  | -.078423  |
| C  | -.491058  | 1.595144  | -.862435  |
| O  | -.718358  | 2.654319  | -1.344163 |
| C  | -.921469  | .478444   | 1.458342  |
| O  | -1.450301 | .813585   | 2.465464  |
| C  | -2.040679 | -1.509023 | -.728881  |
| H  | -1.438155 | -.628615  | -1.161730 |
| H  | -1.575492 | -2.080546 | .074182   |
| H  | -2.070631 | -2.149739 | -1.615582 |
| C  | -3.412548 | -.981955  | -.336487  |
| H  | -4.111011 | -1.811333 | -.194404  |
| H  | -3.354812 | -.413162  | .591793   |
| H  | -3.815314 | -.326653  | -1.112435 |

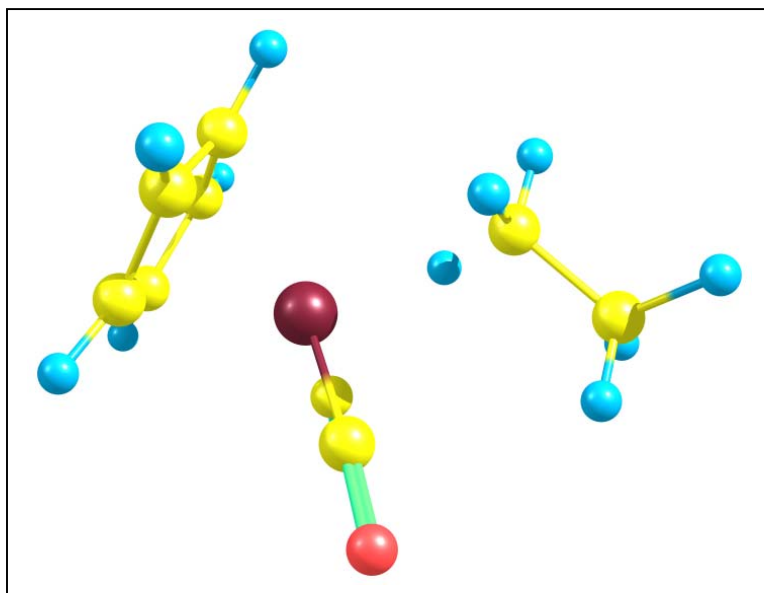

Propane:

|    |           |           |           |
|----|-----------|-----------|-----------|
| C  | -1.738990 | -1.815525 | -.179803  |
| C  | -2.407371 | -.668608  | -.732426  |
| C  | -2.673176 | .246847   | .338327   |
| C  | -2.163754 | -.325476  | 1.553052  |
| C  | -1.560319 | -1.569186 | 1.209421  |
| H  | -1.070760 | -2.239567 | 1.907466  |
| H  | -1.437279 | -2.704136 | -.719279  |
| H  | -2.755876 | -.565369  | -1.751839 |
| H  | -3.243746 | 1.163165  | .257373   |
| H  | -2.236915 | .100600   | 2.545160  |
| Re | -.479584  | .131412   | .012672   |
| C  | -.287612  | 1.988834  | .191744   |
| O  | -.273384  | 3.170006  | .293757   |
| C  | .261217   | .275558   | -1.704354 |
| O  | .653921   | .354435   | -2.820698 |
| C  | 1.857818  | -.663341  | .866313   |
| C  | 3.093573  | -.120042  | .162854   |
| C  | 4.247230  | -1.114713 | .215249   |
| H  | 2.057311  | -.942580  | 1.906789  |
| H  | 1.463502  | -1.545220 | .358778   |
| H  | 1.137699  | .218709   | 1.041484  |
| H  | 2.837597  | .108175   | -.874728  |
| H  | 3.390820  | .825797   | .628927   |
| H  | 4.529254  | -1.338530 | 1.248606  |
| H  | 5.129425  | -.719282  | -.295138  |
| H  | 3.972782  | -2.055833 | -.27092   |

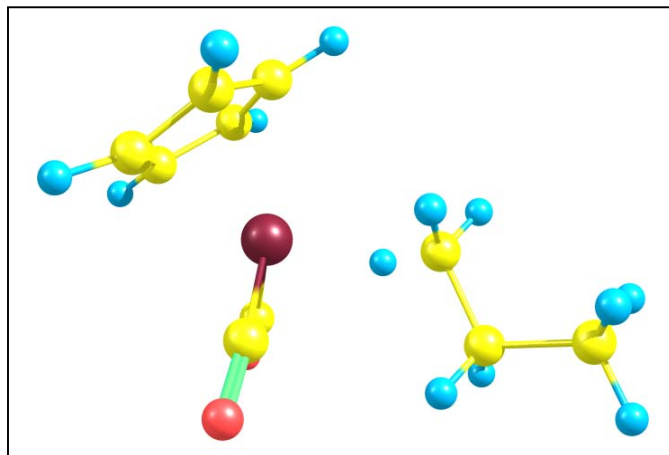

Butane:

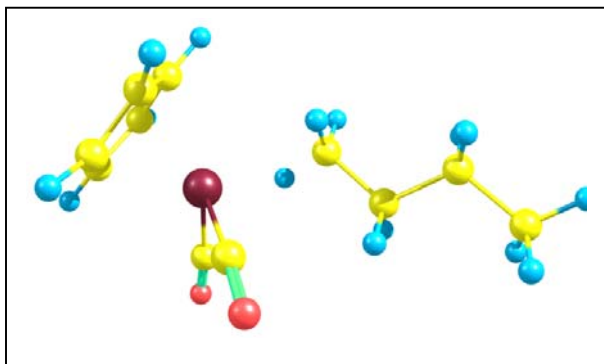

|    |           |           |           |
|----|-----------|-----------|-----------|
| C  | -1.706337 | -1.824147 | -.189229  |
| C  | -2.383460 | -.684135  | -.745532  |
| C  | -2.667581 | .226913   | .324277   |
| C  | -2.160808 | -.341130  | 1.542115  |
| C  | -1.540922 | -1.577599 | 1.201586  |
| H  | -1.048908 | -2.243195 | 1.902484  |
| H  | -1.390441 | -2.708546 | -.727520  |
| H  | -2.725617 | -.583676  | -1.767367 |
| H  | -3.247842 | 1.136841  | .240140   |
| H  | -2.246167 | .082869   | 2.534142  |
| Re | -.470275  | .136634   | .014802   |
| C  | -.299778  | 1.995777  | .196938   |
| O  | -.298810  | 3.176956  | .300145   |
| C  | .282761   | .290853   | -1.695830 |
| O  | .684781   | .375123   | -2.808547 |
| C  | 1.867024  | -.633419  | .883987   |
| C  | 3.098028  | -.078398  | .182416   |
| C  | 4.269137  | -1.053839 | .231251   |
| H  | 2.065836  | -.908622  | 1.925671  |
| H  | 1.482822  | -1.520172 | .377192   |
| H  | 1.136961  | .241412   | 1.057241  |
| H  | 2.844641  | .145585   | -.857962  |
| H  | 3.388559  | .871830   | .646891   |
| H  | 4.512822  | -1.279950 | 1.276894  |
| H  | 3.965987  | -2.002354 | -.229553  |
| C  | 5.504412  | -.511356  | -.478877  |
| H  | 5.840647  | .421408   | -.016912  |
| H  | 6.332534  | -1.224195 | -.438809  |
| H  | 5.287464  | -.304842  | -1.530748 |

Pentane:

|    |           |           |           |
|----|-----------|-----------|-----------|
| C  | 3.087322  | -.882423  | .799102   |
| C  | 3.494156  | -.042362  | -.289030  |
| C  | 2.963199  | -.594725  | -1.503626 |
| C  | 2.208287  | -1.748349 | -1.144334 |
| C  | 2.310104  | -1.964264 | .257432   |
| H  | 3.410914  | -.784189  | 1.827175  |
| H  | 4.163523  | .805136   | -.215092  |
| H  | 3.119442  | -.215620  | -2.505136 |
| H  | 1.668298  | -2.382511 | -1.839028 |
| H  | 1.888513  | -2.792300 | .812716   |
| Re | 1.291642  | .106182   | -.043575  |
| C  | .507876   | .387073   | 1.636941  |
| O  | .083515   | .544703   | 2.733259  |
| C  | 1.322441  | 1.966876  | -.279262  |
| O  | 1.448073  | 3.138251  | -.413378  |
| C  | -1.089346 | -.433756  | -.965798  |
| C  | -2.267717 | .286969   | -.327314  |
| C  | -3.542436 | -.547807  | -.384603  |
| C  | -4.736127 | .150959   | .258388   |
| C  | -6.007431 | -.688775  | .205981   |
| H  | -.825443  | -1.337858 | -.414792  |
| H  | -.257740  | .343954   | -1.146890 |
| H  | -1.287747 | -.725444  | -2.003097 |
| H  | -2.021776 | .519273   | .712950   |
| H  | -2.429540 | 1.246069  | -.834207  |
| H  | -3.781025 | -.785586  | -1.430201 |
| H  | -3.370251 | -1.507876 | .120750   |
| H  | -4.905617 | 1.109764  | -.246291  |
| H  | -4.492469 | .389301   | 1.300554  |
| H  | -6.848908 | -.168703  | .671891   |
| H  | -5.868741 | -1.639028 | .730150   |
| H  | -6.283666 | -.914648  | -.828349  |

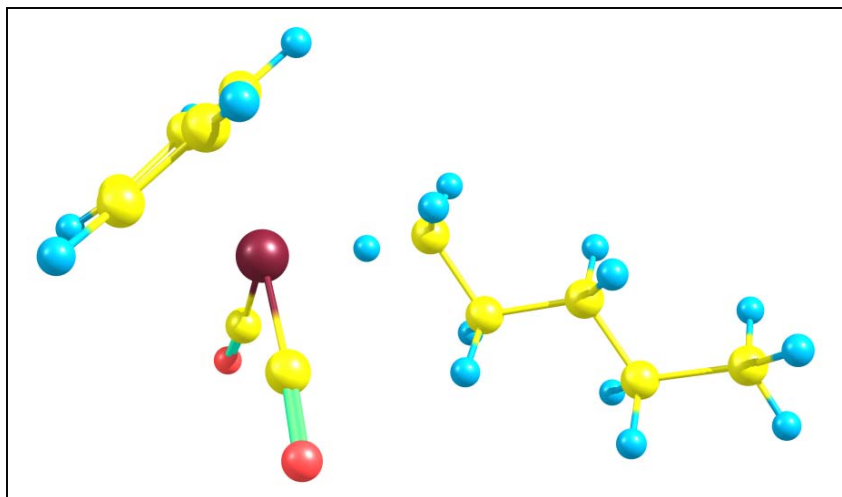

Hexane:

|    |           |           |           |
|----|-----------|-----------|-----------|
| C  | -2.838656 | -1.097660 | 1.173402  |
| C  | -3.325303 | -.149155  | .211654   |
| C  | -2.902805 | -.575692  | -1.090270 |
| C  | -2.162435 | -1.799103 | -.936999  |
| C  | -2.095678 | -2.079185 | .454950   |
| H  | -3.017244 | -1.081425 | 2.240615  |
| H  | -3.975468 | .690998   | .419588   |
| H  | -3.195591 | -.122734  | -2.028552 |
| H  | -1.739646 | -2.397159 | -1.734074 |
| H  | -1.587762 | -2.927804 | .900115   |
| Re | -1.113834 | .013893   | .077206   |
| C  | -1.119632 | 1.690311  | .918560   |
| O  | -1.228559 | 2.753236  | 1.432647  |
| C  | -.265191  | .813392   | -1.392064 |
| O  | .200557   | 1.313601  | -2.361365 |
| C  | 1.229663  | -.850230  | .836949   |
| H  | 1.385788  | -1.504115 | 1.702119  |
| H  | .381723   | -.189177  | 1.254169  |
| H  | 1.001448  | -1.486259 | -.019636  |
| C  | 2.424296  | .052208   | .564779   |
| H  | 2.547161  | .757613   | 1.395669  |
| H  | 2.221858  | .651052   | -.328006  |
| C  | 3.709259  | -.746247  | .373021   |
| H  | 3.898939  | -1.358955 | 1.264767  |
| H  | 3.579688  | -1.446161 | -.463549  |
| C  | 4.919607  | .142317   | .104339   |
| H  | 5.049316  | .840186   | .942077   |
| H  | 4.725571  | .758582   | -.783197  |
| C  | 6.209882  | -.644841  | -.099598  |
| H  | 6.397628  | -1.264751 | .785787   |
| H  | 6.079450  | -1.338171 | -.939513  |
| C  | 7.413132  | .254702   | -.359677  |
| H  | 8.326174  | -.329517  | -.504532  |
| H  | 7.257866  | .863128   | -1.255469 |
| H  | 7.579545  | .934976   | .480824   |

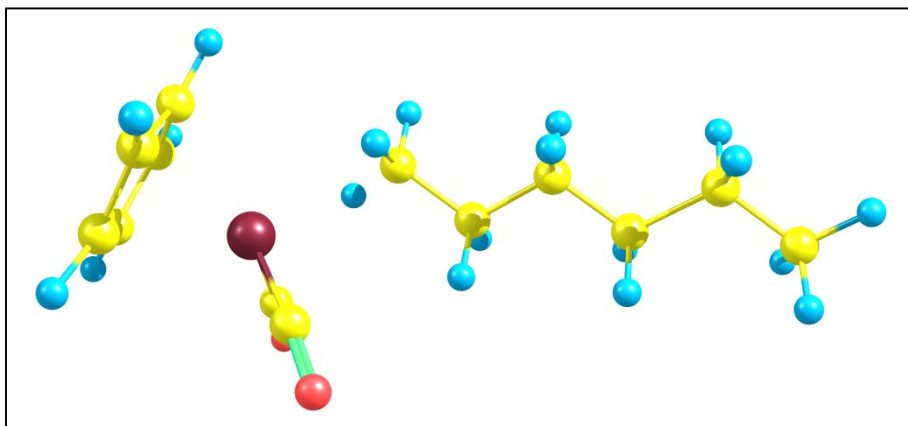

Heptane:

|    |           |           |           |
|----|-----------|-----------|-----------|
| C  | -4.407413 | -.117040  | .169485   |
| C  | -3.930817 | -.887395  | -.941633  |
| C  | -3.150547 | -1.978222 | -.422926  |
| C  | -3.117099 | -1.835977 | .991578   |
| C  | -3.916917 | -.721602  | 1.376243  |
| H  | -4.127075 | -.400610  | 2.388156  |
| H  | -2.592081 | -2.493576 | 1.675883  |
| H  | -2.683460 | -2.765052 | -1.001231 |
| H  | -4.210704 | -.741461  | -1.976851 |
| H  | -5.094801 | .717041   | .109812   |
| Re | -2.200811 | .096413   | .033344   |
| C  | -2.289022 | 1.939670  | .369865   |
| O  | -2.449760 | 3.098509  | .562624   |
| C  | -1.353677 | .491448   | -1.592756 |
| O  | -.887840  | .722021   | -2.658897 |
| C  | .148198   | -.440378  | 1.033992  |
| C  | 1.337860  | .337488   | .490542   |
| C  | 2.629716  | -.468062  | .578682   |
| C  | 3.836228  | .289244   | .032826   |
| C  | 5.132733  | -.509449  | .118811   |
| C  | 6.341486  | .244871   | -.425486  |
| C  | 7.631749  | -.561959  | -.331161  |
| H  | -.708410  | .309689   | 1.215342  |
| H  | -.068532  | -1.319609 | .425220   |
| H  | .304960   | -.781691  | 2.063247  |
| H  | 1.447948  | 1.276080  | 1.047228  |
| H  | 1.139368  | .611066   | -.549890  |
| H  | 2.509746  | -1.407838 | .022794   |
| H  | 2.818510  | -.747214  | 1.624152  |
| H  | 3.952378  | 1.231133  | .584931   |
| H  | 3.646335  | .565400   | -1.012490 |
| H  | 5.016129  | -1.451937 | -.432761  |
| H  | 5.320281  | -.786241  | 1.165015  |
| H  | 6.454859  | 1.187138  | .124379   |
| H  | 6.153358  | .519138   | -1.470604 |
| H  | 8.484016  | -.002578  | -.726951  |
| H  | 7.854051  | -.821196  | .708322   |
| H  | 7.550336  | -1.494565 | -.897446  |

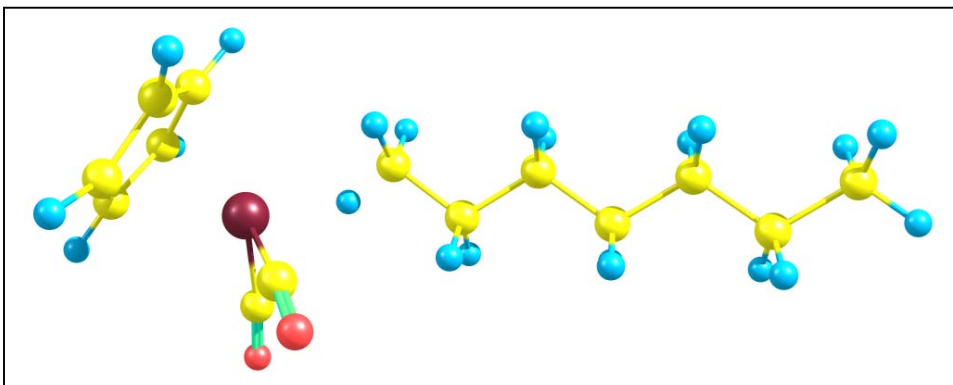



Cyclopropane:

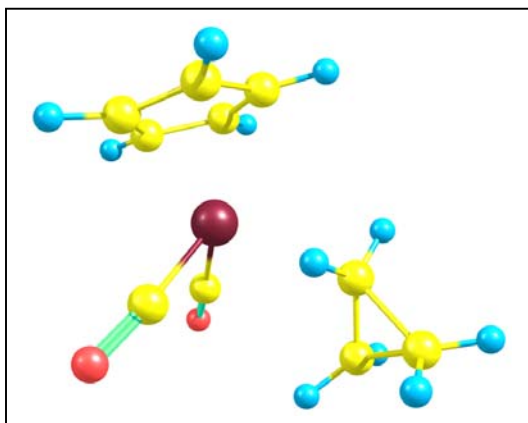

|    |           |           |           |
|----|-----------|-----------|-----------|
| C  | -1.158614 | -.163604  | -1.569749 |
| C  | -1.947352 | .692227   | -.732154  |
| C  | -2.254131 | -.035537  | .471439   |
| C  | -1.599217 | -1.290627 | .386823   |
| C  | -.948318  | -1.402030 | -.880244  |
| H  | -.835542  | .065870   | -2.577318 |
| H  | -2.362030 | 1.649898  | -1.018134 |
| H  | -2.856388 | .319105   | 1.298284  |
| H  | -1.620656 | -2.061973 | 1.148892  |
| H  | -.430641  | -2.272378 | -1.261666 |
| Re | .022815   | .391835   | .237099   |
| C  | 1.519095  | .865475   | -.787459  |
| O  | 2.409144  | 1.170347  | -1.511180 |
| C  | .093643   | 2.106541  | .995430   |
| O  | .088373   | 3.204182  | 1.440709  |
| C  | 1.196987  | -.438395  | 2.253827  |
| C  | 2.030754  | .621907   | 2.918399  |
| C  | 2.580144  | -.754483  | 2.842802  |
| H  | .359747   | -.865650  | 2.789453  |
| H  | 2.461876  | 1.382328  | 2.279403  |
| H  | 1.663348  | .986626   | 3.871937  |
| H  | 3.384301  | -.949399  | 2.141186  |
| H  | 2.590622  | -1.371115 | 3.734907  |
| H  | 1.336237  | -.696240  | 1.147456  |

Cyclobutane:

|    |           |           |           |
|----|-----------|-----------|-----------|
| C  | -.869148  | .286952   | -1.544468 |
| C  | -1.887222 | .527787   | -.565545  |
| C  | -2.172824 | -.719705  | .091051   |
| C  | -1.288430 | -1.691896 | -.446675  |
| C  | -.504800  | -1.098162 | -1.481960 |
| H  | -.497912  | 1.010742  | -2.258809 |
| H  | -2.433613 | 1.453133  | -.437343  |
| H  | -2.916399 | -.882926  | .860840   |
| H  | -1.242229 | -2.733201 | -.147118  |
| H  | .210668   | -1.605224 | -2.116031 |
| Re | .000583   | .020945   | .494100   |
| C  | 1.526558  | 1.029035  | .078397   |
| O  | 2.444590  | 1.699999  | -.259523  |
| C  | -.304743  | 1.208113  | 1.915535  |
| O  | -.557208  | 1.987149  | 2.772512  |
| C  | 2.106324  | -2.156351 | 3.989654  |
| C  | 1.589742  | -.786395  | 3.499882  |
| C  | 1.000745  | -1.505730 | 2.283597  |
| C  | 2.006473  | -2.663906 | 2.534798  |
| H  | 3.085362  | -2.196364 | 4.474294  |
| H  | 2.410176  | -.129931  | 3.195515  |
| H  | .899295   | -.220660  | 4.128677  |
| H  | 1.290658  | -1.110079 | 1.228359  |
| H  | -.023220  | -1.844255 | 2.435615  |
| H  | 2.941612  | -2.500263 | 1.991254  |
| H  | 1.659378  | -3.684603 | 2.353293  |
| H  | 1.372154  | -2.650937 | 4.632317  |

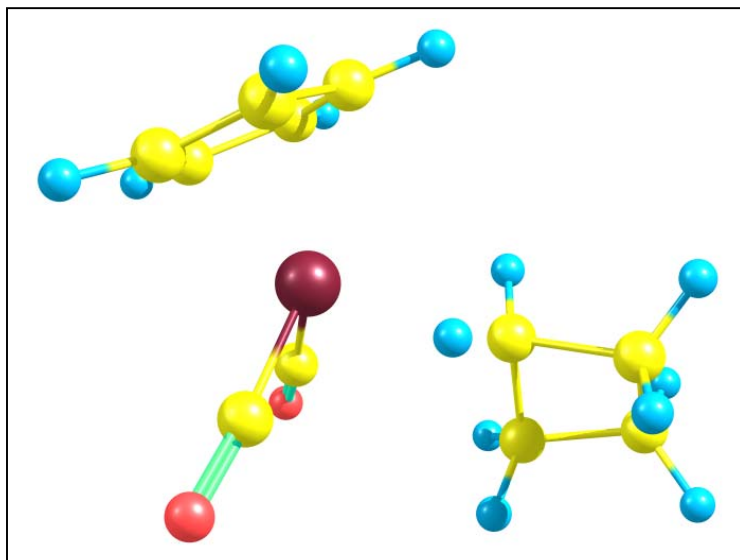

Cyclopentane:

|    |           |           |           |
|----|-----------|-----------|-----------|
| C  | -1.288384 | .154578   | -1.594284 |
| C  | -1.983444 | .891441   | -.580212  |
| C  | -2.287283 | -.014645  | .494934   |
| C  | -1.725007 | -1.274514 | .156569   |
| C  | -1.139729 | -1.198931 | -1.142900 |
| H  | -.999114  | .536685   | -2.565002 |
| H  | -2.331533 | 1.912408  | -.668253  |
| H  | -2.836546 | .222755   | 1.397154  |
| H  | -1.766269 | -2.166430 | .772199   |
| H  | -.689944  | -2.015296 | -1.692770 |
| Re | .004159   | .302246   | .214875   |
| C  | 1.512886  | .745978   | -.803902  |
| O  | 2.405513  | 1.044711  | -1.526128 |
| C  | .253342   | 1.904109  | 1.162872  |
| O  | .343487   | 2.947841  | 1.717345  |
| C  | 3.050812  | -.996966  | 3.731410  |
| C  | 2.169930  | -2.245469 | 3.842433  |
| C  | 1.534035  | -2.344369 | 2.457129  |
| C  | 1.159893  | -.878559  | 2.177853  |
| C  | 2.248137  | -.019763  | 2.845327  |
| H  | 3.991674  | -1.263004 | 3.237642  |
| H  | 2.730155  | -3.142795 | 4.122834  |
| H  | 1.387037  | -2.092806 | 4.595180  |
| H  | 2.274900  | -2.699197 | 1.730539  |
| H  | .669721   | -3.014338 | 2.408951  |
| H  | .174889   | -.678046  | 2.601314  |
| H  | 1.260554  | -.828828  | 1.023721  |
| H  | 1.785557  | .781888   | 3.427396  |
| H  | 2.878049  | .462260   | 2.092872  |
| H  | 3.306999  | -.568780  | 4.704739  |

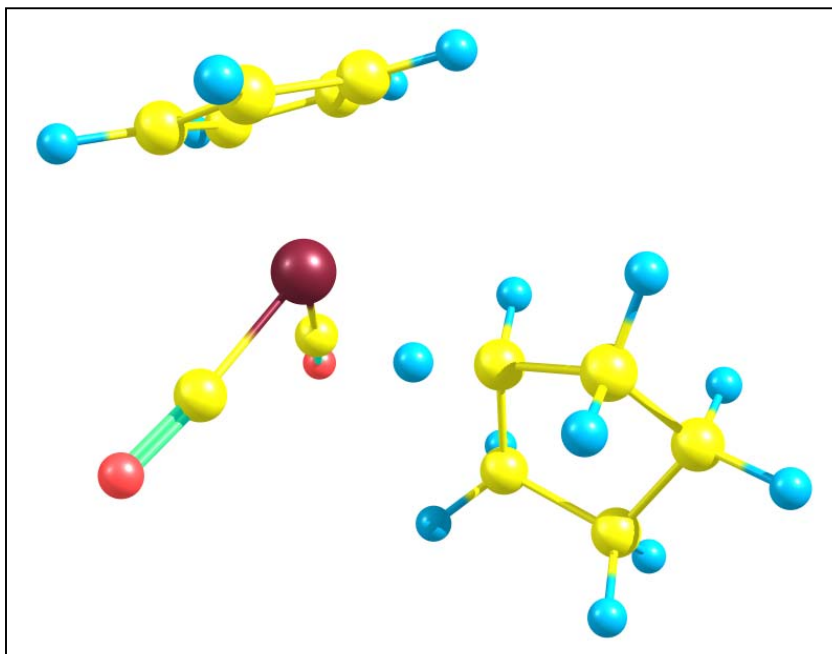

Cyclohexane:

|    |           |           |           |
|----|-----------|-----------|-----------|
| C  | .739126   | .575965   | -2.000144 |
| C  | -.521942  | .520194   | -1.321632 |
| C  | -.796265  | -.856554  | -1.011256 |
| C  | .314062   | -1.620308 | -1.464318 |
| C  | 1.249779  | -.762121  | -2.110222 |
| H  | 1.177421  | 1.461198  | -2.442979 |
| H  | -1.196585 | 1.353206  | -1.172785 |
| H  | -1.686460 | -1.240052 | -.529114  |
| H  | .417674   | -2.695325 | -1.365283 |
| H  | 2.164965  | -1.063103 | -2.603264 |
| Re | 1.085655  | -.050841  | .101239   |
| C  | 2.565533  | 1.087656  | .271040   |
| O  | 3.468732  | 1.856124  | .290403   |
| C  | .294186   | .838844   | 1.549412  |
| O  | -.260228  | 1.430484  | 2.415231  |
| C  | 2.591926  | -3.163394 | 1.189236  |
| C  | 2.256931  | -4.435597 | 1.965253  |
| C  | 2.392099  | -4.213114 | 3.470338  |
| C  | 1.517177  | -3.052015 | 3.938492  |
| C  | 1.841713  | -1.767471 | 3.178005  |
| C  | 1.725513  | -2.003354 | 1.675335  |
| H  | 3.649843  | -2.909004 | 1.338447  |
| H  | 1.226015  | -4.738409 | 1.735514  |
| H  | 2.906604  | -5.255911 | 1.638575  |
| H  | 2.131708  | -5.128992 | 4.013260  |
| H  | 3.441394  | -3.993239 | 3.708389  |
| H  | .460473   | -3.307032 | 3.779453  |
| H  | 1.641439  | -2.888999 | 5.015186  |
| H  | 2.865722  | -1.447089 | 3.412439  |
| H  | 1.175608  | -.953045  | 3.477279  |
| H  | .678733   | -2.194357 | 1.419596  |
| H  | 2.231222  | -1.082147 | 1.190219  |
| H  | 2.451765  | -3.310687 | .112515   |

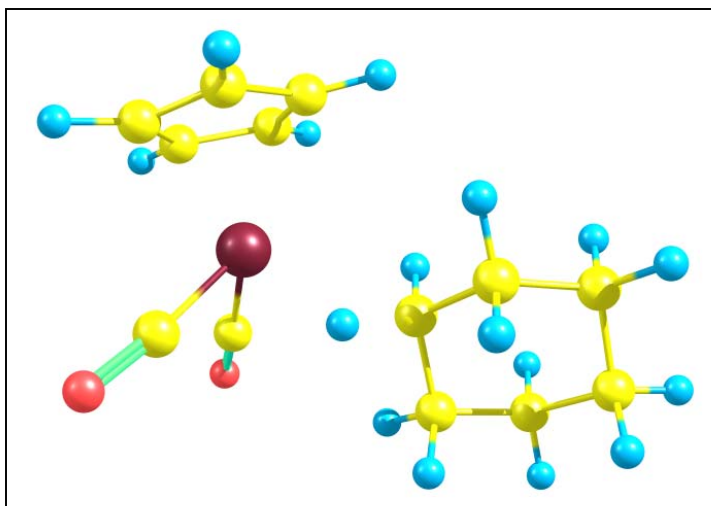

## 4-2 Binuclear rhenium complexes.

### 4-2a. Binuclear Re, HF.

Complex:

|    |           |           |           |
|----|-----------|-----------|-----------|
| Re | -3.345239 | -0.074239 | 0.610360  |
| C  | -4.236967 | 1.375836  | -0.336002 |
| C  | 4.200488  | -1.714127 | 0.712047  |
| C  | -4.110440 | 0.440009  | 2.327352  |
| C  | -0.594183 | -1.930367 | -0.016178 |
| C  | -2.029037 | -1.941143 | -0.032357 |
| C  | -2.844331 | -1.566191 | -1.132343 |
| H  | -2.522831 | -2.716868 | 1.984222  |
| H  | -2.494051 | -1.285432 | -2.103139 |
| C  | -4.200981 | -1.726036 | -0.723278 |
| H  | -5.063053 | -1.568864 | -1.337928 |
| C  | -4.212823 | -2.191557 | 0.610578  |
| H  | -5.083216 | -2.454312 | 1.175001  |
| C  | -2.859417 | -2.333413 | 1.044075  |
| C  | 0.595376  | -1.929339 | -0.001510 |
| O  | 4.654012  | 2.185146  | 0.988678  |
| O  | -4.799896 | 2.150910  | -0.936896 |
| O  | -4.598503 | 0.647074  | 3.325988  |
| Re | 3.345168  | -0.074953 | -0.636909 |
| H  | 2.486494  | -1.264748 | 2.081733  |
| C  | 4.197419  | 0.444328  | -2.310479 |
| C  | 4.146346  | 1.397868  | 0.355427  |
| H  | 5.088350  | -2.453724 | -1.178157 |
| C  | 4.215267  | -2.191554 | -0.617381 |
| C  | 2.865185  | -2.335913 | -1.056520 |
| H  | 5.059930  | -1.554363 | 1.329490  |
| H  | 2.532178  | -2.731420 | -1.992819 |
| C  | 2.030235  | -1.938218 | 0.017698  |
| O  | 4.736587  | 0.655468  | -3.281658 |
| C  | 2.840452  | -1.556924 | 1.115551  |

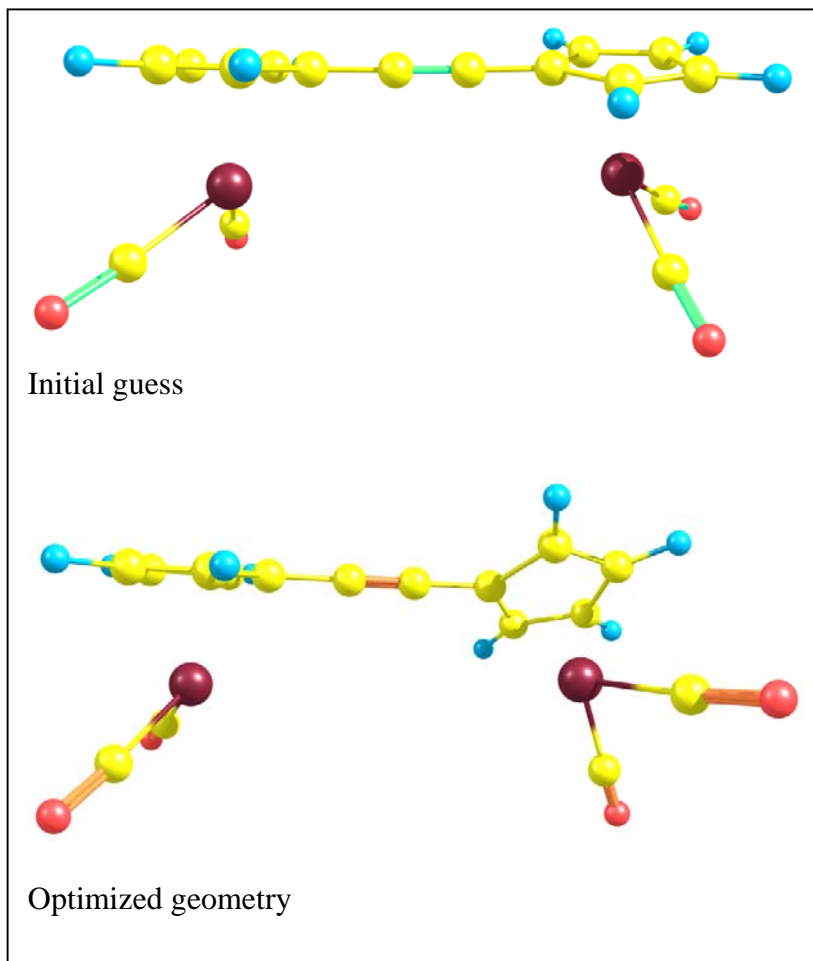

Methane:

|    |           |           |           |
|----|-----------|-----------|-----------|
| C  | -2.773341 | -1.874566 | 1.153095  |
| C  | -1.962432 | -1.782745 | -0.013353 |
| C  | -2.799547 | -1.744109 | -1.149585 |
| C  | -4.150846 | -1.806856 | -0.690978 |
| C  | -4.128038 | -1.898334 | 0.718640  |
| C  | -0.528367 | -1.774039 | -0.035270 |
| C  | 0.661186  | -1.776598 | -0.057660 |
| C  | 2.095331  | -1.789906 | -0.084682 |
| C  | 2.942040  | -1.642129 | 1.042885  |
| C  | 4.287922  | -1.707676 | 0.571893  |
| C  | 4.259371  | -1.893312 | -0.828099 |
| C  | 2.894355  | -1.947734 | -1.243727 |
| H  | -2.416759 | -1.992173 | 2.154524  |
| H  | -4.985221 | -2.005962 | 1.350955  |
| H  | -5.022324 | -1.854035 | -1.310044 |
| H  | -2.469285 | -1.720874 | -2.167050 |
| H  | 2.530835  | -2.137131 | -2.231705 |
| H  | 5.112730  | -2.031150 | -1.459088 |
| H  | 5.167189  | -1.678588 | 1.181438  |
| H  | 2.620233  | -1.566380 | 2.060118  |
| Re | 3.396788  | 0.175727  | -0.372252 |
| C  | 4.165796  | 1.036819  | -1.942294 |
| O  | 4.656434  | 1.449982  | -2.873455 |
| C  | 4.264249  | 1.407068  | 0.862076  |
| O  | 4.814405  | 2.043656  | 1.617807  |
| Re | -3.324165 | 0.174565  | 0.132996  |
| C  | -4.358114 | 1.101004  | 1.488518  |
| O  | -5.004728 | 1.559864  | 2.296565  |
| C  | -4.014399 | 1.314845  | -1.283526 |
| O  | -4.448996 | 1.907290  | -2.143991 |
| C  | -1.012204 | 1.962952  | 0.185456  |
| H  | -1.369363 | 2.936220  | -0.117205 |
| H  | -0.183590 | 2.065232  | 0.875645  |
| H  | -1.794524 | 1.462726  | 0.787949  |
| H  | -0.706407 | 1.386764  | -0.673428 |

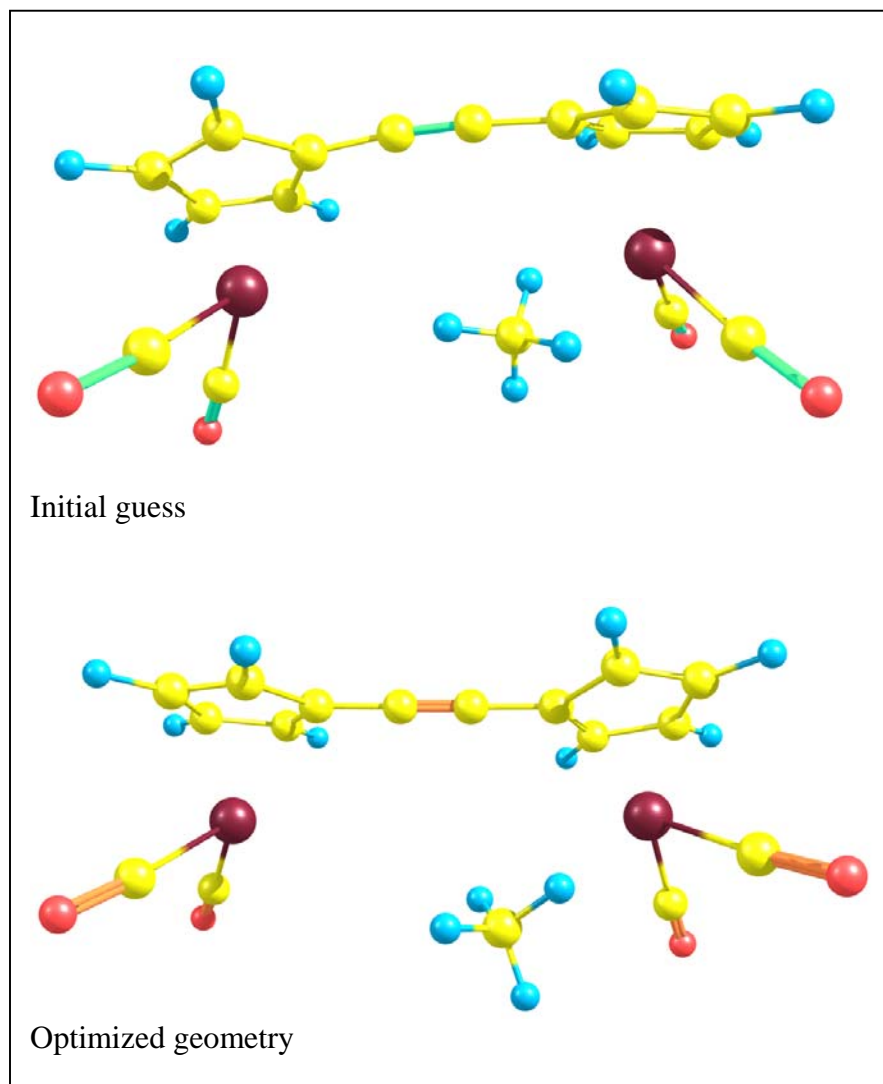

Ethane:

|    |           |           |           |
|----|-----------|-----------|-----------|
| C  | -4.181042 | 1.779154  | -1.036905 |
| C  | -2.787591 | 1.773520  | -1.346276 |
| C  | -2.084521 | 1.869077  | -0.120996 |
| C  | -3.019422 | 1.933424  | 0.943462  |
| C  | -4.321732 | 1.879282  | 0.364189  |
| H  | -4.980831 | 1.771329  | -1.748040 |
| H  | -2.346487 | 1.764439  | -2.320765 |
| H  | -2.781597 | 2.070080  | 1.977430  |
| H  | -5.247363 | 1.955517  | 0.896230  |
| C  | -0.657270 | 1.867000  | 0.019578  |
| C  | 0.524763  | 1.799668  | 0.134306  |
| C  | 1.943500  | 1.638542  | 0.268775  |
| C  | 2.875402  | 1.628049  | -0.796593 |
| C  | 4.166444  | 1.406951  | -0.228919 |
| C  | 4.018284  | 1.287546  | 1.169943  |
| C  | 2.635441  | 1.427774  | 1.489208  |
| H  | 2.200239  | 1.446275  | 2.466118  |
| H  | 2.650325  | 1.814513  | -1.825700 |
| H  | 5.093102  | 1.396133  | -0.764235 |
| H  | 4.814249  | 1.165744  | 1.875157  |
| Re | 2.973737  | -0.513951 | 0.194339  |
| C  | 3.755076  | -1.546549 | -1.257329 |
| O  | 4.261185  | -2.076015 | -2.119519 |
| C  | 3.574126  | -1.784991 | 1.533868  |
| O  | 3.975634  | -2.455650 | 2.352706  |
| Re | -3.354719 | -0.153791 | -0.105401 |
| C  | -3.998358 | -1.316089 | -1.522451 |
| O  | -4.414493 | -1.916576 | -2.387042 |
| C  | -4.342656 | -1.126666 | 1.257566  |
| O  | -4.963458 | -1.615914 | 2.067082  |
| C  | -0.868500 | -1.656861 | 0.566818  |
| C  | 0.317033  | -1.729614 | -0.390708 |
| H  | 0.335240  | -0.883082 | -1.058991 |
| H  | 1.239231  | -1.784929 | 0.219049  |
| H  | 0.308097  | -2.635505 | -0.983553 |
| H  | -1.794079 | -1.636262 | -0.039241 |
| H  | -0.800767 | -0.795852 | 1.213119  |
| H  | -0.950652 | -2.543077 | 1.183498  |

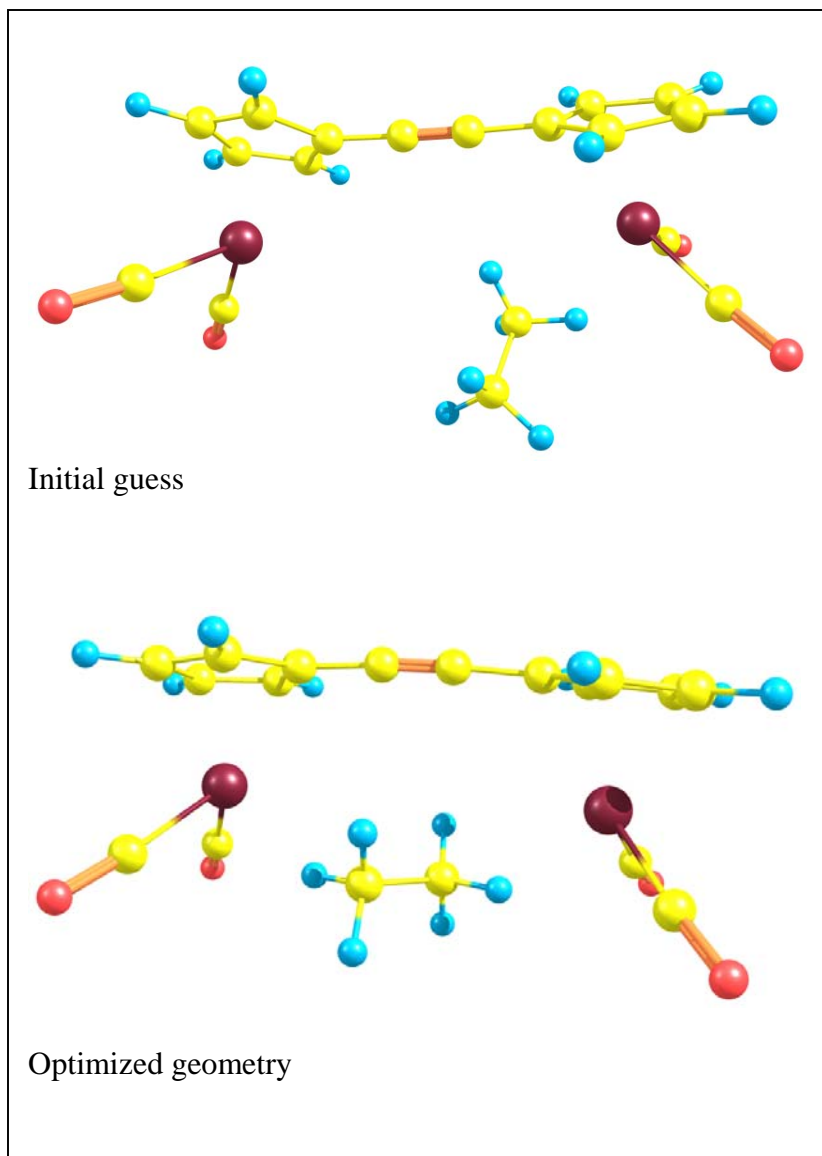

Propane:

|    |           |           |           |
|----|-----------|-----------|-----------|
| Re | 0.084728  | 2.943142  | -0.633574 |
| C  | 1.585865  | 3.559544  | 0.431744  |
| C  | -2.741797 | -4.163626 | -2.816266 |
| C  | -1.165897 | 4.100032  | 0.304680  |
| C  | -0.631223 | 0.196684  | -2.549539 |
| C  | -0.215706 | 1.569552  | -2.570171 |
| C  | 1.128283  | 2.031102  | -2.539197 |
| H  | -2.144860 | 2.638519  | -2.768771 |
| H  | 2.001250  | 1.413171  | -2.534441 |
| C  | 1.085308  | 3.451871  | -2.633866 |
| H  | 1.934906  | 4.101229  | -2.684524 |
| C  | -0.266184 | 3.855578  | -2.709288 |
| H  | -0.615760 | 4.858323  | -2.841321 |
| C  | -1.080010 | 2.682656  | -2.675623 |
| C  | -0.985795 | -0.939101 | -2.557032 |
| O  | -5.229871 | -3.629936 | 0.265175  |
| O  | 2.498850  | 3.944789  | 0.979022  |
| O  | -1.909003 | 4.814838  | 0.770836  |
| Re | -2.305244 | -3.465872 | -0.668190 |
| H  | -3.548012 | -2.104068 | -3.163902 |
| C  | -1.721584 | -4.811539 | 0.599593  |
| C  | -4.139358 | -3.550932 | -0.025889 |
| H  | -1.116982 | -5.608523 | -2.395392 |
| C  | -1.438495 | -4.590548 | -2.476846 |
| C  | -0.613720 | -3.443819 | -2.308854 |
| H  | -3.568670 | -4.798215 | -3.058009 |
| H  | 0.438344  | -3.431321 | -2.116656 |
| C  | -1.426715 | -2.303537 | -2.568471 |
| O  | -1.357952 | -5.651647 | 1.266346  |
| C  | -2.732330 | -2.736925 | -2.882748 |
| C  | -0.234640 | 0.834473  | 1.524720  |
| H  | -0.907115 | 1.202229  | 2.290438  |
| H  | 0.774471  | 1.110664  | 1.790720  |
| H  | -0.543943 | 1.333970  | 0.584362  |
| C  | -0.361303 | -0.673959 | 1.322514  |
| H  | 0.308964  | -0.989664 | 0.530997  |
| H  | -0.035987 | -1.174905 | 2.229685  |
| C  | -1.786903 | -1.102512 | 0.985514  |
| H  | -2.483896 | -0.865985 | 1.781441  |
| H  | -2.139242 | -0.638430 | 0.076426  |
| H  | -1.801919 | -2.209331 | 0.919356  |

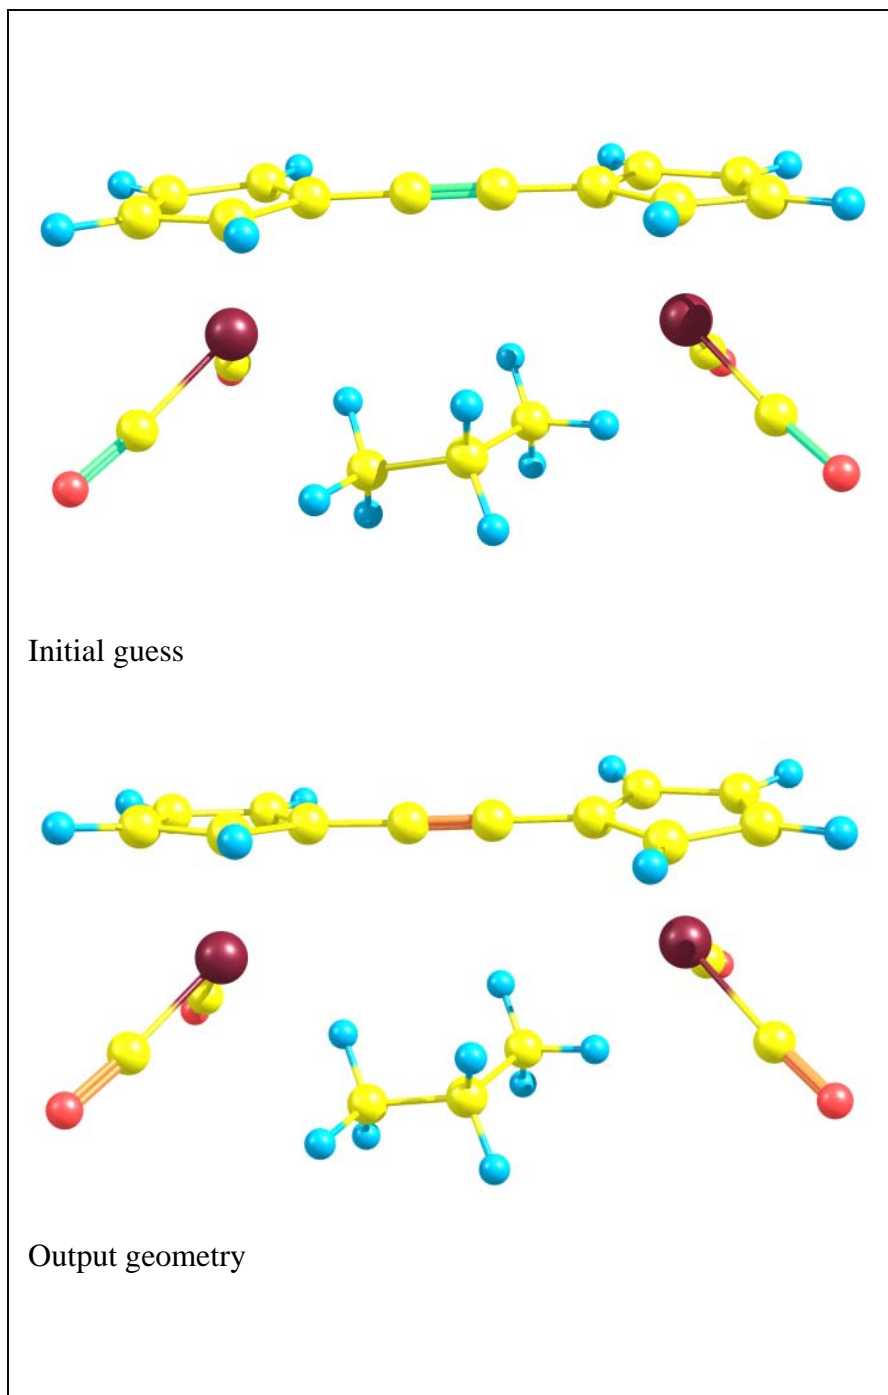



Butane:

|    |           |           |           |
|----|-----------|-----------|-----------|
| Re | 0.155951  | 3.057322  | -0.639222 |
| C  | 1.916482  | 3.672697  | -0.102246 |
| C  | -2.513442 | -4.260122 | -2.904843 |
| C  | -0.728547 | 4.193928  | 0.660940  |
| C  | -0.936901 | 0.306204  | -2.449770 |
| C  | -0.652153 | 1.712816  | -2.477525 |
| C  | 0.587312  | 2.294406  | -2.842849 |
| H  | -2.620029 | 2.606779  | -1.981640 |
| H  | 1.460223  | 1.759610  | -3.153098 |
| C  | 0.412674  | 3.709899  | -2.822558 |
| H  | 1.146811  | 4.435523  | -3.105740 |
| C  | -0.918015 | 3.986654  | -2.440098 |
| H  | -1.365582 | 4.957354  | -2.385463 |
| C  | -1.586352 | 2.745322  | -2.219945 |
| C  | -1.177821 | -0.859526 | -2.454945 |
| O  | -5.370729 | -4.246229 | -0.162419 |
| O  | 2.952645  | 4.067987  | 0.124271  |
| O  | -1.284765 | 4.903087  | 1.346203  |
| Re | -2.420615 | -3.585556 | -0.712356 |
| H  | -3.513517 | -2.302800 | -3.331132 |
| C  | -1.785052 | -4.859939 | 0.602829  |
| C  | -4.280235 | -3.982774 | -0.310231 |
| H  | -0.786066 | -5.513446 | -2.312135 |
| C  | -1.217191 | -4.539252 | -2.418049 |
| C  | -0.560189 | -3.305591 | -2.147094 |
| H  | -3.225324 | -4.982017 | -3.247132 |
| H  | 0.454139  | -3.173090 | -1.834474 |
| C  | -1.465698 | -2.265157 | -2.493302 |
| O  | -1.375143 | -5.652822 | 1.299700  |
| C  | -2.668429 | -2.841507 | -2.956528 |
| C  | -2.346902 | -1.279943 | 1.057550  |
| H  | -3.292981 | -0.796914 | 1.273340  |
| H  | -2.576708 | -2.362754 | 1.027908  |
| H  | -2.005550 | -0.918086 | 0.100134  |
| C  | -1.320486 | -1.030159 | 2.165266  |
| H  | -1.768998 | -1.275745 | 3.122885  |
| H  | -0.474233 | -1.700004 | 2.040133  |
| C  | -0.826249 | 0.422475  | 2.187190  |
| H  | -0.366533 | 0.635353  | 3.147327  |
| H  | -1.674464 | 1.095157  | 2.095749  |
| C  | 0.186624  | 0.710693  | 1.076358  |
| H  | 1.138967  | 0.230016  | 1.269307  |
| H  | -0.161267 | 0.369820  | 0.113582  |
| H  | 0.411662  | 1.794683  | 1.070097  |

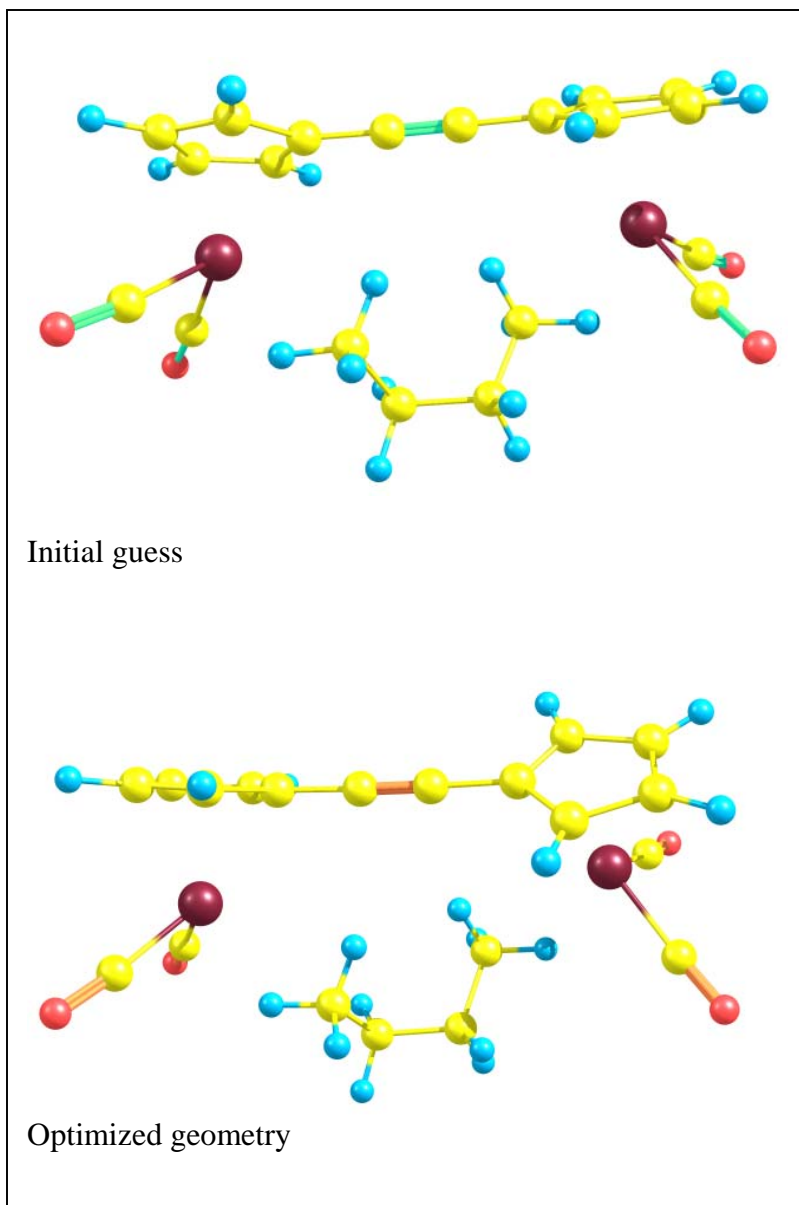

Pentane:

|    |           |           |           |
|----|-----------|-----------|-----------|
| Re | 0.379781  | 2.886955  | -0.662716 |
| C  | 2.167927  | 3.391885  | -0.096333 |
| C  | -2.696733 | -4.185174 | -2.910016 |
| C  | -0.453519 | 3.939837  | 0.739770  |
| C  | -0.884336 | 0.299014  | -2.503540 |
| C  | -0.525606 | 1.688561  | -2.522076 |
| C  | 0.741182  | 2.209461  | -2.892673 |
| H  | -2.428355 | 2.678446  | -1.962235 |
| H  | 1.575716  | 1.635777  | -3.236920 |
| C  | 0.650598  | 3.630394  | -2.817485 |
| H  | 1.424178  | 4.321698  | -3.081214 |
| C  | -0.654743 | 3.972451  | -2.401340 |
| H  | -1.042121 | 4.965262  | -2.303253 |
| C  | -1.393264 | 2.764542  | -2.218371 |
| C  | -1.187947 | -0.851048 | -2.509345 |
| O  | -5.539482 | -4.175572 | -0.173654 |
| O  | 3.221722  | 3.719939  | 0.154787  |
| O  | -0.979183 | 4.602369  | 1.492744  |
| Re | -2.621270 | -3.405084 | -0.752181 |
| H  | -3.572352 | -2.195791 | -3.445675 |
| C  | -1.937107 | -4.451807 | 0.732875  |
| C  | -4.461859 | -3.871219 | -0.338265 |
| H  | -1.062933 | -5.513787 | -2.219865 |
| C  | -1.436035 | -4.522053 | -2.370485 |
| C  | -0.713439 | -3.312928 | -2.139656 |
| H  | -3.444686 | -4.879423 | -3.233080 |
| H  | 0.294239  | -3.224421 | -1.791614 |
| C  | -1.546314 | -2.240496 | -2.540358 |
| O  | -1.493933 | -5.112364 | 1.538835  |
| C  | -2.774566 | -2.765245 | -3.017472 |
| C  | -3.204529 | -1.066257 | 1.025831  |
| H  | -4.022384 | -0.752711 | 0.392839  |
| H  | -2.485467 | -1.654628 | 0.417961  |
| H  | -3.593906 | -1.700491 | 1.810918  |
| C  | -2.460362 | 0.140082  | 1.605169  |
| H  | -2.150970 | 0.795834  | 0.798441  |
| H  | -3.176396 | 0.704739  | 2.196093  |
| C  | -1.262309 | -0.224917 | 2.493437  |
| H  | -1.550901 | -1.045272 | 3.146050  |
| H  | -1.038453 | 0.613644  | 3.148315  |
| C  | 0.017092  | -0.612815 | 1.738216  |
| H  | 0.670819  | -1.159160 | 2.412662  |
| H  | -0.212052 | -1.291868 | 0.923891  |
| C  | 0.815694  | 0.578176  | 1.201005  |
| H  | 0.161517  | 1.146031  | 0.506879  |
| H  | 1.125900  | 1.235399  | 2.002235  |
| H  | 1.691921  | 0.249376  | 0.660484  |

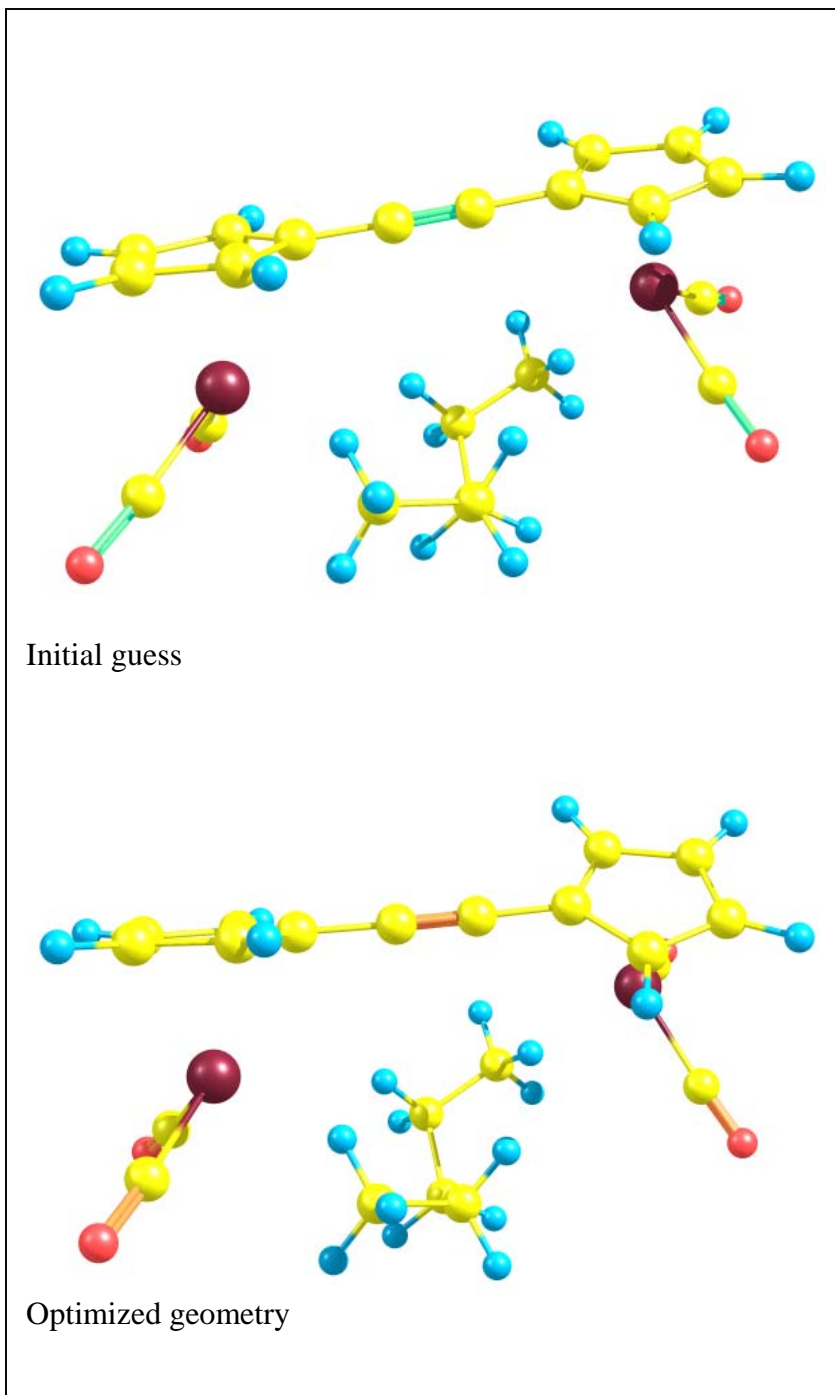

Cyclopropane:

|    |           |           |           |
|----|-----------|-----------|-----------|
| C  | -0.379078 | 0.174453  | -3.316222 |
| C  | 0.266844  | -0.829576 | -2.551635 |
| C  | 1.544432  | -1.082263 | -3.108839 |
| C  | 1.692863  | -0.219996 | -4.236816 |
| C  | 0.514875  | 0.548128  | -4.363508 |
| C  | -0.277592 | -1.467432 | -1.388667 |
| C  | -0.716910 | -1.964364 | -0.401830 |
| C  | -1.229824 | -2.527641 | 0.812792  |
| C  | -2.501243 | -2.253594 | 1.373646  |
| C  | -2.600358 | -3.001738 | 2.585298  |
| C  | -1.399553 | -3.724303 | 2.757257  |
| C  | -0.539363 | -3.433558 | 1.656891  |
| H  | -1.377147 | 0.528495  | -3.166238 |
| H  | 0.307113  | 1.250587  | -5.143967 |
| H  | 2.527689  | -0.201707 | -4.906493 |
| H  | 2.233851  | -1.829735 | -2.776796 |
| H  | 0.419074  | -3.865263 | 1.459431  |
| H  | -1.192715 | -4.414809 | 3.548494  |
| H  | -3.458797 | -3.052770 | 3.222476  |
| H  | -3.262661 | -1.648363 | 0.928503  |
| Re | -0.909848 | -1.487741 | 2.934103  |
| C  | 0.372082  | -1.717493 | 4.376102  |
| O  | 1.093767  | -1.943313 | 5.218379  |
| C  | -1.985837 | -0.252485 | 3.982581  |
| O  | -2.681118 | 0.404826  | 4.586407  |
| Re | 1.555661  | 1.168414  | -2.412219 |
| C  | 1.143147  | 3.057676  | -2.601430 |
| O  | 0.865587  | 4.137628  | -2.796229 |
| C  | 3.466757  | 1.512120  | -2.298680 |
| O  | 4.588318  | 1.660170  | -2.308964 |
| C  | 1.469386  | 1.049201  | 0.591776  |
| C  | 1.497504  | 1.913431  | 1.813792  |
| C  | 0.414704  | 0.893555  | 1.636934  |
| H  | 1.133236  | 1.549432  | -0.319919 |
| H  | 2.267735  | 1.722238  | 2.538798  |
| H  | 1.224835  | 2.948696  | 1.717222  |
| H  | 0.517159  | 0.004742  | 2.264056  |
| H  | -0.579883 | 1.230824  | 1.424685  |
| H  | 2.210075  | 0.282205  | 0.487067  |

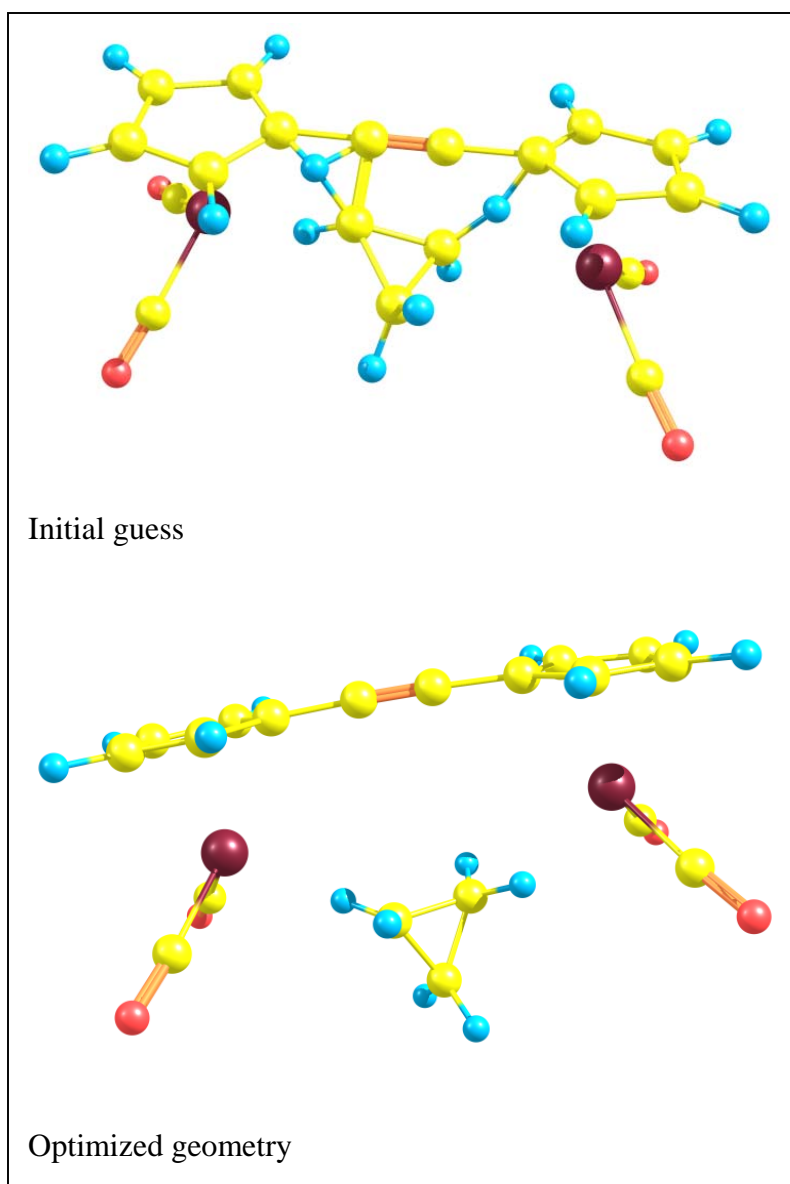

Cyclobutane:

|    |           |           |           |
|----|-----------|-----------|-----------|
| C  | -0.977035 | 0.263118  | -3.326712 |
| C  | -0.468889 | -0.778219 | -2.481522 |
| C  | 0.820499  | -1.122474 | -2.987510 |
| C  | 1.106451  | -0.323753 | -4.101097 |
| C  | -0.010124 | 0.551789  | -4.308165 |
| C  | -1.176478 | -1.459058 | -1.441868 |
| C  | -1.756639 | -2.021430 | -0.566973 |
| C  | -2.455605 | -2.704356 | 0.482277  |
| C  | -3.850907 | -2.631830 | 0.729709  |
| C  | -4.121004 | -3.443271 | 1.872593  |
| C  | -2.903085 | -4.000077 | 2.320332  |
| C  | -1.860609 | -3.542770 | 1.455446  |
| H  | -1.946354 | 0.709821  | -3.245341 |
| H  | -0.122997 | 1.249044  | -5.111995 |
| H  | 1.986978  | -0.378447 | -4.707435 |
| H  | 1.461724  | -1.872404 | -2.569858 |
| H  | -0.829465 | -3.826242 | 1.489046  |
| H  | -2.790621 | -4.694804 | 3.126422  |
| H  | -5.088511 | -3.637610 | 2.287149  |
| H  | -4.566692 | -2.121184 | 0.120757  |
| Re | -2.801167 | -1.737914 | 2.628967  |
| C  | -1.768784 | -1.818677 | 4.276233  |
| O  | -1.174104 | -1.964556 | 5.228213  |
| C  | -4.264001 | -0.766975 | 3.471273  |
| O  | -5.172411 | -0.282154 | 3.939522  |
| Re | 0.857548  | 1.142310  | -2.256434 |
| C  | -0.189850 | 2.317779  | -1.118745 |
| O  | -0.867930 | 2.973221  | -0.493275 |
| C  | 1.963306  | 2.613607  | -2.880579 |
| O  | 2.579619  | 3.452902  | -3.324754 |
| C  | 3.705574  | -0.172911 | 0.491352  |
| C  | 3.559492  | 0.472856  | 1.888238  |
| C  | 2.500495  | 1.432524  | 1.298190  |
| C  | 2.343669  | 0.454007  | 0.119609  |
| H  | 4.518593  | 0.268093  | -0.073622 |
| H  | 4.445640  | 0.916610  | 2.325142  |
| H  | 3.124972  | -0.213269 | 2.606542  |
| H  | 2.937957  | 2.373168  | 0.984246  |
| H  | 1.617894  | 1.639415  | 1.890446  |
| H  | 2.352652  | 0.913257  | -0.893839 |
| H  | 1.522682  | -0.233476 | 0.252606  |
| H  | 3.787457  | -1.251652 | 0.435954  |

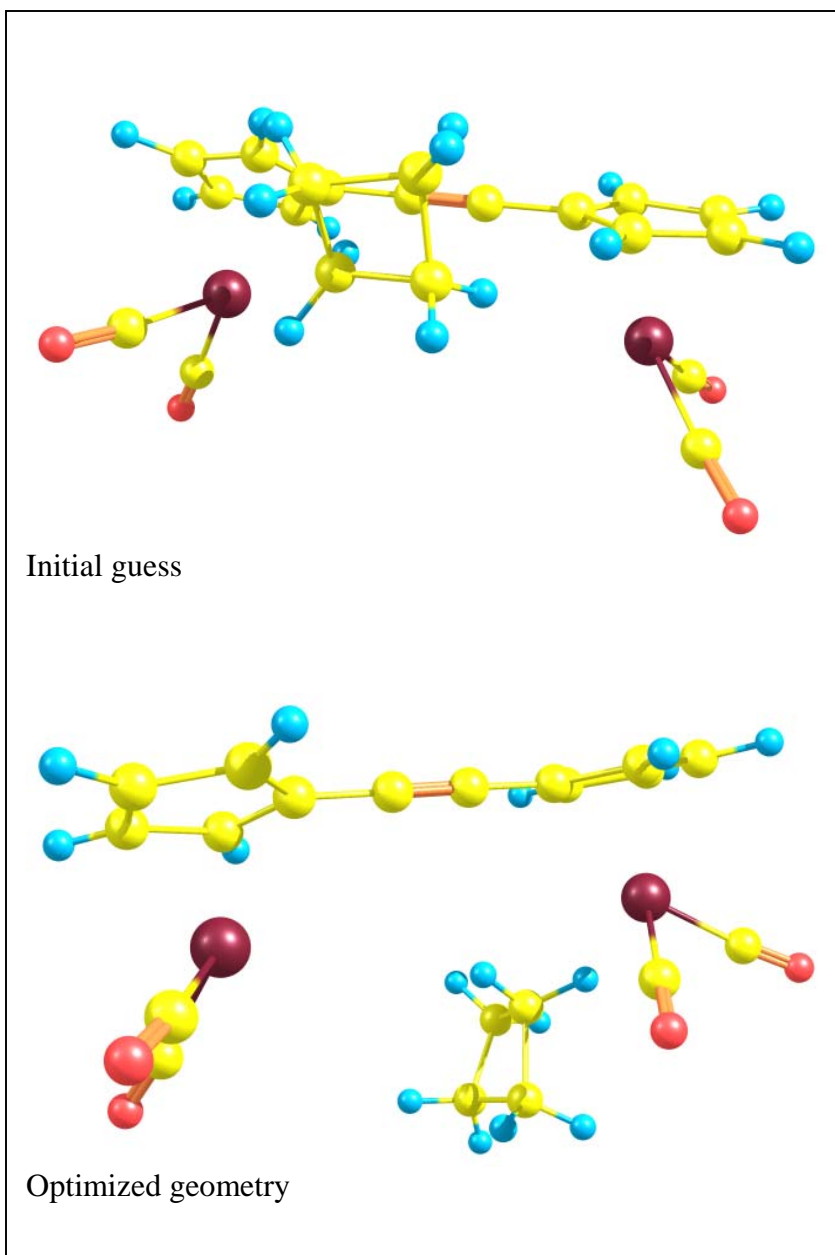

Cyclopentane:

|    |           |           |           |
|----|-----------|-----------|-----------|
| C  | 0.012859  | 0.908107  | -2.866461 |
| C  | 0.523674  | -0.226495 | -2.187601 |
| C  | 1.694523  | -0.671319 | -2.849511 |
| C  | 1.913143  | 0.203623  | -3.955496 |
| C  | 0.883282  | 1.169192  | -3.966241 |
| C  | -0.034560 | -0.810626 | -1.003195 |
| C  | -0.466110 | -1.263726 | 0.008124  |
| C  | -0.945050 | -1.769248 | 1.261425  |
| C  | -2.000845 | -1.211419 | 2.021836  |
| C  | -2.129197 | -1.995348 | 3.207781  |
| C  | -1.162074 | -3.022866 | 3.164578  |
| C  | -0.417949 | -2.888490 | 1.955425  |
| H  | -0.894234 | 1.422919  | -2.628858 |
| H  | 0.748262  | 1.932209  | -4.704640 |
| H  | 2.690250  | 0.108782  | -4.685340 |
| H  | 2.263523  | -1.540970 | -2.596299 |
| H  | 0.346809  | -3.544089 | 1.595424  |
| H  | -1.042491 | -3.800403 | 3.890430  |
| H  | -2.870516 | -1.864087 | 3.968511  |
| H  | -2.619903 | -0.391425 | 1.724116  |
| Re | -0.051890 | -1.014063 | 3.338241  |
| C  | 1.310359  | -1.668488 | 4.559995  |
| O  | 2.060084  | -2.124841 | 5.274577  |
| C  | -0.595844 | 0.382854  | 4.571292  |
| O  | -0.997620 | 1.157477  | 5.292963  |
| Re | 2.151874  | 1.510508  | -2.077291 |
| C  | 2.057849  | 3.449373  | -2.145647 |
| O  | 1.960546  | 4.571544  | -2.258183 |
| C  | 4.092529  | 1.520638  | -2.118970 |
| O  | 5.219505  | 1.479304  | -2.221256 |
| C  | 2.087039  | 0.529696  | 1.903136  |
| C  | 1.834435  | 1.701145  | 0.934596  |
| C  | 2.489978  | 2.902958  | 1.615782  |
| C  | 3.767957  | 2.305910  | 2.212416  |
| C  | 3.338472  | 0.918348  | 2.731119  |
| H  | 2.189103  | -0.412056 | 1.388706  |
| H  | 1.206020  | 0.495536  | 2.577089  |
| H  | 2.414303  | 1.473801  | 0.014103  |
| H  | 0.792754  | 1.835417  | 0.689120  |
| H  | 1.836808  | 3.262187  | 2.407747  |
| H  | 2.673189  | 3.730111  | 0.941065  |
| H  | 4.517728  | 2.201639  | 1.433137  |
| H  | 4.198789  | 2.923014  | 2.992177  |
| H  | 4.127488  | 0.183311  | 2.626681  |
| H  | 3.091669  | 0.968086  | 3.784879  |

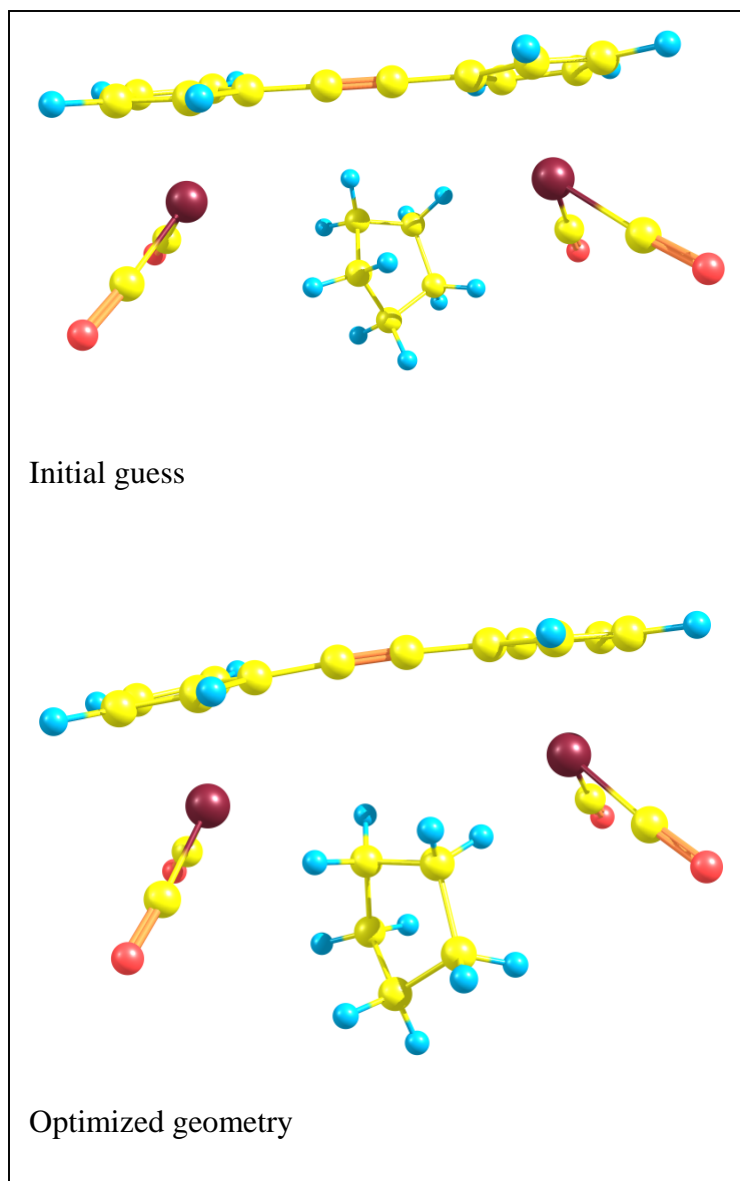

Cyclohexane:

|    |           |           |           |
|----|-----------|-----------|-----------|
| C  | -.161466  | -.109533  | -3.285842 |
| C  | .420340   | -1.017127 | -2.367592 |
| C  | 1.795679  | -1.168435 | -2.675414 |
| C  | 2.068602  | -.338482  | -3.803072 |
| C  | .871460   | .310459   | -4.176502 |
| C  | -.263863  | -1.665712 | -1.288633 |
| C  | -.815054  | -2.176778 | -.367520  |
| C  | -1.455276 | -2.742195 | .783344   |
| C  | -2.756649 | -2.421852 | 1.239581  |
| C  | -2.979362 | -3.164135 | 2.438788  |
| C  | -1.824236 | -3.931826 | 2.703577  |
| C  | -.868365  | -3.674551 | 1.676507  |
| H  | -1.197068 | .154163   | -3.332921 |
| H  | .747773   | .959688   | -5.017405 |
| H  | 3.006570  | -.262902  | -4.313177 |
| H  | 2.475515  | -1.834985 | -2.187960 |
| H  | .086037   | -4.141681 | 1.554240  |
| H  | -1.707052 | -4.627856 | 3.508259  |
| H  | -3.887417 | -3.182909 | 3.004956  |
| H  | -3.455642 | -1.786140 | .738119   |
| Re | -1.263734 | -1.715462 | 2.917364  |
| C  | -.101151  | -1.981571 | 4.452599  |
| O  | .551381   | -2.222584 | 5.345342  |
| C  | -2.372747 | -.430586  | 3.864368  |
| O  | -3.089223 | .259629   | 4.404223  |
| Re | 1.487330  | 1.099356  | -2.109388 |
| C  | .909328   | 2.923575  | -2.445562 |
| O  | .551536   | 3.960631  | -2.724646 |
| C  | 3.312583  | 1.643999  | -1.738371 |
| O  | 4.404736  | 1.908178  | -1.597817 |
| C  | .890727   | 3.038515  | 1.237748  |
| C  | 2.304492  | 3.078660  | 1.826648  |
| C  | 2.454331  | 2.115284  | 3.008066  |
| C  | 2.030096  | .690856   | 2.635538  |
| C  | .608215   | .679773   | 2.067994  |
| C  | .470825   | 1.614488  | .860401   |
| H  | .182328   | 3.415005  | 1.973569  |
| H  | 3.025564  | 2.817575  | 1.055703  |
| H  | 2.541471  | 4.091179  | 2.139536  |
| H  | 3.481493  | 2.114724  | 3.360164  |
| H  | 1.841310  | 2.463436  | 3.837725  |
| H  | 2.715730  | .285986   | 1.893889  |
| H  | 2.091079  | .043673   | 3.504375  |
| H  | -.082456  | 1.025393  | 2.831447  |
| H  | .332130   | -.343924  | 1.772862  |
| H  | 1.148473  | 1.228689  | .068810   |
| H  | -.539007  | 1.595402  | .472195   |
| H  | .820475   | 3.694860  | .377663   |

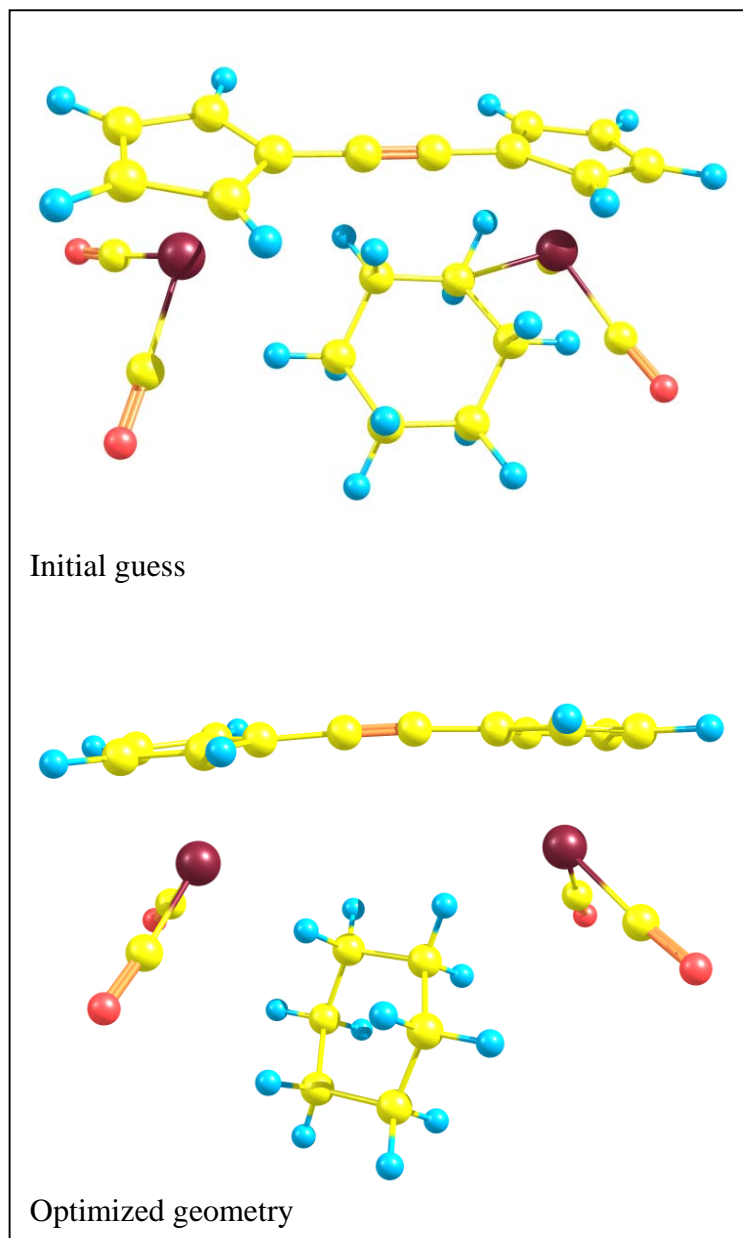



## 4-2b. Binuclear Re, DFT(B3LYP).

Complex:

|    |           |           |           |
|----|-----------|-----------|-----------|
| Re | -3.183251 | -0.104452 | 0.489715  |
| C  | -3.910591 | 1.280986  | -0.609992 |
| C  | 4.212576  | -1.733083 | 0.611549  |
| C  | -3.912151 | 0.670409  | 2.077557  |
| C  | -0.607044 | -2.157317 | 0.017208  |
| C  | -2.024499 | -2.117706 | 0.037958  |
| C  | -2.858385 | -1.804910 | -1.087631 |
| H  | -2.509958 | -2.589961 | 2.177954  |
| H  | -2.513312 | -1.647995 | -2.099352 |
| C  | -4.211557 | -1.745767 | -0.613328 |
| H  | -5.089693 | -1.569292 | -1.218398 |
| C  | -4.210772 | -2.061597 | 0.790599  |
| H  | -5.089655 | -2.159837 | 1.413046  |
| C  | -2.855289 | -2.306542 | 1.194506  |
| C  | 0.608264  | -2.153310 | -0.015675 |
| O  | 4.461688  | 2.039081  | 1.331500  |
| O  | -4.413326 | 2.044134  | -1.333630 |
| O  | -4.413993 | 1.046320  | 3.060261  |
| Re | 3.179282  | -0.087384 | -0.480929 |
| H  | 2.517479  | -1.645980 | 2.101327  |
| C  | 3.880429  | 0.693847  | -2.079091 |
| C  | 3.936983  | 1.286058  | 0.612807  |
| H  | 5.088391  | -2.133606 | -1.418782 |
| C  | 4.210437  | -2.039532 | -0.794412 |
| C  | 2.854290  | -2.287563 | -1.196290 |
| H  | 5.091372  | -1.555850 | 1.215531  |
| H  | 2.507944  | -2.566363 | -2.180739 |
| C  | 2.025435  | -2.106741 | -0.038298 |
| O  | 4.366550  | 1.073037  | -3.068300 |
| C  | 2.860876  | -1.796149 | 1.087980  |

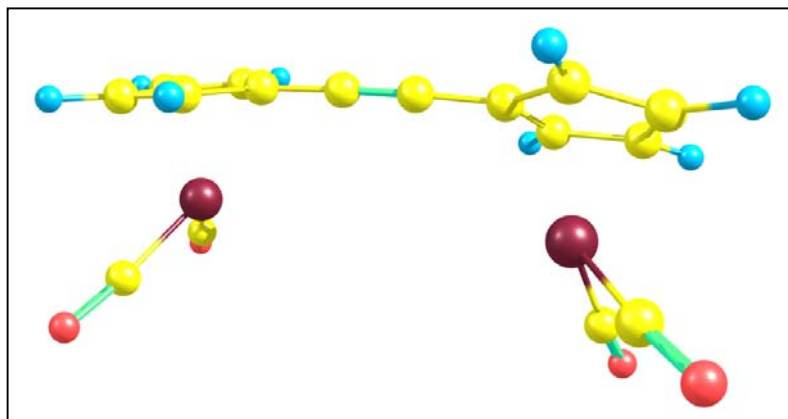

Methane:

|    |           |           |           |
|----|-----------|-----------|-----------|
| C  | -2.740496 | -1.869508 | 1.147720  |
| C  | -1.958564 | -1.815305 | -0.072960 |
| C  | -2.859979 | -1.736703 | -1.175562 |
| C  | -4.199985 | -1.709281 | -0.655961 |
| C  | -4.113009 | -1.816059 | 0.772920  |
| C  | -0.543681 | -1.837054 | -0.136274 |
| C  | 0.672195  | -1.830821 | -0.150564 |
| C  | 2.090050  | -1.831455 | -0.146897 |
| C  | 2.914343  | -1.604315 | 1.009273  |
| C  | 4.277664  | -1.583728 | 0.565318  |
| C  | 4.293912  | -1.821332 | -0.853687 |
| C  | 2.936901  | -1.993733 | -1.292746 |
| H  | -2.339124 | -1.986038 | 2.144070  |
| H  | -4.956482 | -1.866312 | 1.448762  |
| H  | -5.108528 | -1.709855 | -1.241859 |
| H  | -2.572338 | -1.678429 | -2.216296 |
| H  | 2.602702  | -2.212903 | -2.296433 |
| H  | 5.180204  | -1.931005 | -1.463406 |
| H  | 5.150190  | -1.470112 | 1.193546  |
| H  | 2.555562  | -1.482524 | 2.021412  |
| Re | 3.348914  | 0.159573  | -0.466052 |
| C  | 4.090882  | 0.988682  | -2.021002 |
| O  | 4.596558  | 1.397493  | -2.988505 |
| C  | 4.171792  | 1.427088  | 0.700958  |
| O  | 4.731627  | 2.109554  | 1.463485  |
| Re | -3.251565 | 0.187124  | 0.134704  |
| C  | -4.440289 | 1.141832  | 1.272194  |
| O  | -5.219086 | 1.643364  | 1.982184  |
| C  | -3.708446 | 1.346194  | -1.312212 |
| O  | -4.024136 | 1.975063  | -2.241879 |
| C  | -1.026324 | 1.746078  | 0.490512  |
| H  | -1.251744 | 2.535498  | -0.222471 |
| H  | -0.475106 | 2.155112  | 1.343757  |
| H  | -1.961714 | 1.389523  | 1.032065  |
| H  | -0.446685 | 0.944715  | 0.035055  |

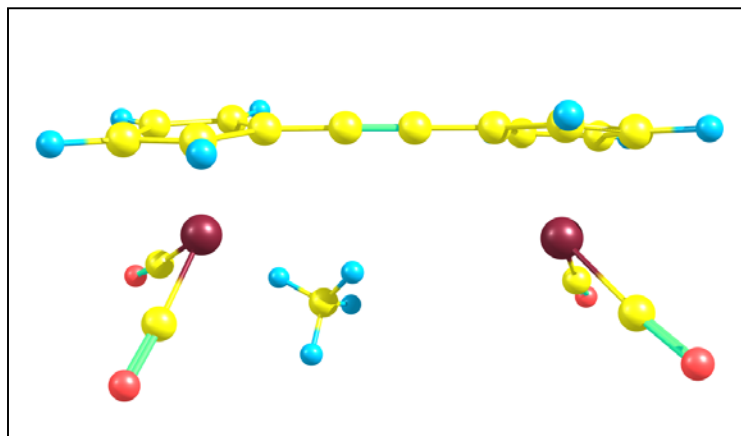



Ethane:

|    |           |           |           |
|----|-----------|-----------|-----------|
| C  | -4.140699 | 1.567467  | -1.198842 |
| C  | -2.734492 | 1.622561  | -1.468849 |
| C  | -2.071623 | 1.907597  | -0.221046 |
| C  | -3.061276 | 2.048605  | 0.800726  |
| C  | -4.346379 | 1.814806  | 0.198740  |
| H  | -4.922221 | 1.406671  | -1.928981 |
| H  | -2.250103 | 1.516389  | -2.428482 |
| H  | -2.863802 | 2.279818  | 1.837966  |
| H  | -5.304524 | 1.894413  | 0.693428  |
| C  | -0.665334 | 1.948401  | -0.026738 |
| C  | 0.535677  | 1.879956  | 0.140473  |
| C  | 1.924054  | 1.671928  | 0.351045  |
| C  | 2.946270  | 1.726671  | -0.644917 |
| C  | 4.182685  | 1.333859  | -0.023915 |
| C  | 3.919237  | 1.081022  | 1.362331  |
| C  | 2.523636  | 1.283836  | 1.605301  |
| H  | 2.008394  | 1.208785  | 2.551796  |
| H  | 2.801523  | 1.999382  | -1.680707 |
| H  | 5.153900  | 1.319074  | -0.497056 |
| H  | 4.660237  | 0.815035  | 2.103788  |
| Re | 2.880551  | -0.502711 | 0.129276  |
| C  | 3.574585  | -1.357857 | -1.431942 |
| O  | 4.059789  | -1.793236 | -2.398594 |
| C  | 3.532525  | -1.911976 | 1.232149  |
| O  | 3.990628  | -2.703516 | 1.957499  |
| Re | -3.262667 | -0.150625 | -0.028356 |
| C  | -4.048176 | -1.454279 | -1.172790 |
| O  | -4.582397 | -2.174578 | -1.919835 |
| C  | -4.054046 | -0.972277 | 1.503114  |
| O  | -4.587401 | -1.384199 | 2.454762  |
| C  | -0.846171 | -1.492463 | 0.520733  |
| C  | 0.340334  | -1.565098 | -0.445876 |
| H  | 0.393193  | -0.679253 | -1.078304 |
| H  | 1.258442  | -1.723383 | 0.199652  |
| H  | 0.308669  | -2.448174 | -1.089644 |
| H  | -1.773509 | -1.505269 | -0.131563 |
| H  | -0.775431 | -0.619666 | 1.168752  |
| H  | -0.938506 | -2.385073 | 1.144686  |

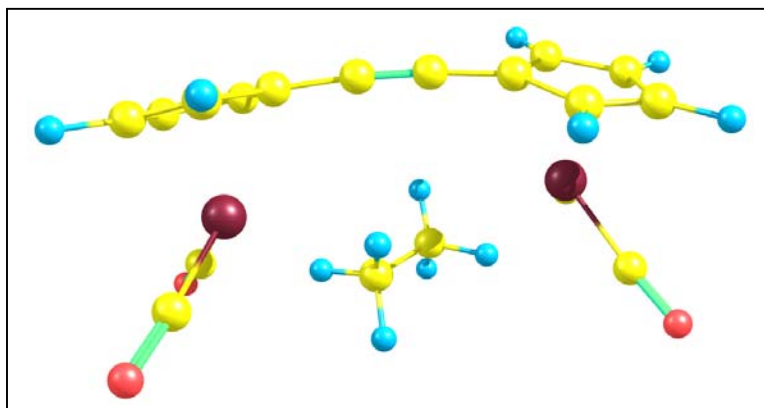

Propane:

|    |           |           |           |
|----|-----------|-----------|-----------|
| Re | 0.021141  | 2.914051  | -0.622568 |
| C  | 1.366390  | 3.573440  | 0.550276  |
| C  | -2.922063 | -4.097857 | -2.694545 |
| C  | -1.277262 | 4.075604  | 0.157260  |
| C  | -0.592871 | 0.191028  | -2.592567 |
| C  | -0.133762 | 1.533172  | -2.581142 |
| C  | 1.232580  | 1.956459  | -2.398278 |
| H  | -2.014390 | 2.686073  | -2.949363 |
| H  | 2.083952  | 1.299047  | -2.292657 |
| C  | 1.244631  | 3.386352  | -2.449329 |
| H  | 2.121909  | 4.015419  | -2.381962 |
| C  | -0.098812 | 3.846942  | -2.660315 |
| H  | -0.398671 | 4.875352  | -2.807979 |
| C  | -0.949343 | 2.692269  | -2.765093 |
| C  | -0.992610 | -0.956132 | -2.610928 |
| O  | -5.036361 | -3.745303 | 0.558628  |
| O  | 2.243381  | 4.002648  | 1.190249  |
| O  | -2.076282 | 4.837941  | 0.532549  |
| Re | -2.230301 | -3.441084 | -0.650263 |
| H  | -3.670754 | -1.986570 | -2.974187 |
| C  | -1.535710 | -4.756003 | 0.538366  |
| C  | -3.951369 | -3.605322 | 0.153126  |
| H  | -1.314357 | -5.637415 | -2.417175 |
| C  | -1.593872 | -4.594501 | -2.478444 |
| C  | -0.693407 | -3.478690 | -2.438802 |
| H  | -3.808915 | -4.701616 | -2.828087 |
| H  | 0.381682  | -3.514977 | -2.334803 |
| C  | -1.480692 | -2.287656 | -2.613646 |
| O  | -1.092373 | -5.622638 | 1.182976  |
| C  | -2.850591 | -2.666546 | -2.792354 |
| C  | -0.374267 | 0.907502  | 1.432338  |
| H  | -1.089210 | 1.179622  | 2.215656  |
| H  | 0.606091  | 1.283425  | 1.720201  |
| H  | -0.786370 | 1.421893  | 0.508177  |
| C  | -0.329535 | -0.599159 | 1.160287  |
| H  | 0.313768  | -0.793835 | 0.295276  |
| H  | 0.137623  | -1.091851 | 2.022436  |
| C  | -1.718109 | -1.196510 | 0.917867  |
| H  | -2.384283 | -1.069586 | 1.776670  |
| H  | -2.198537 | -0.755406 | 0.044359  |
| H  | -1.567215 | -2.321611 | 0.852790  |

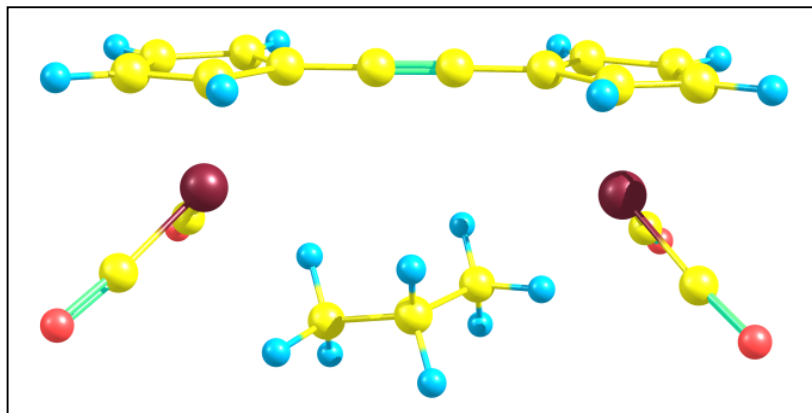

Butane:

|    |           |           |           |
|----|-----------|-----------|-----------|
| Re | 0.079091  | 3.038560  | -0.616262 |
| C  | 1.668796  | 3.808506  | 0.087368  |
| C  | -2.720046 | -4.217563 | -2.807987 |
| C  | -0.996060 | 4.074462  | 0.568576  |
| C  | -0.886033 | 0.296987  | -2.498494 |
| C  | -0.566131 | 1.680125  | -2.513522 |
| C  | 0.742976  | 2.242609  | -2.733489 |
| H  | -2.564916 | 2.632643  | -2.205741 |
| H  | 1.642728  | 1.677594  | -2.930482 |
| C  | 0.601586  | 3.668146  | -2.712985 |
| H  | 1.389686  | 4.385356  | -2.897138 |
| C  | -0.775626 | 3.984728  | -2.468850 |
| H  | -1.207091 | 4.975494  | -2.458888 |
| C  | -1.501575 | 2.749041  | -2.362408 |
| C  | -1.162244 | -0.886926 | -2.503609 |
| O  | -5.302789 | -4.150131 | 0.067946  |
| O  | 2.661113  | 4.320957  | 0.427227  |
| O  | -1.696279 | 4.758970  | 1.203297  |
| Re | -2.385368 | -3.565748 | -0.682776 |
| H  | -3.654130 | -2.195176 | -3.173129 |
| C  | -1.743232 | -4.867464 | 0.546628  |
| C  | -4.182363 | -3.911954 | -0.153315 |
| H  | -0.991172 | -5.575697 | -2.358116 |
| C  | -1.381707 | -4.569966 | -2.433383 |
| C  | -0.626955 | -3.364089 | -2.257415 |
| H  | -3.507974 | -4.908034 | -3.073971 |
| H  | 0.425114  | -3.281676 | -2.024924 |
| C  | -1.509695 | -2.263288 | -2.533038 |
| O  | -1.318755 | -5.721330 | 1.220440  |
| C  | -2.796266 | -2.784274 | -2.881429 |
| C  | -2.229958 | -1.366470 | 1.011860  |
| H  | -3.226551 | -1.003959 | 1.279019  |
| H  | -2.322419 | -2.496220 | 0.997239  |
| H  | -1.962199 | -0.934252 | 0.046550  |
| C  | -1.195589 | -1.046082 | 2.102391  |
| H  | -1.605228 | -1.338804 | 3.076253  |
| H  | -0.293726 | -1.653637 | 1.952297  |
| C  | -0.815474 | 0.445994  | 2.125384  |
| H  | -0.371392 | 0.697550  | 3.095830  |
| H  | -1.718846 | 1.061717  | 2.030779  |
| C  | 0.182935  | 0.799308  | 1.013118  |
| H  | 1.187799  | 0.428621  | 1.239340  |
| H  | -0.112843 | 0.381776  | 0.049476  |
| H  | 0.306134  | 1.927945  | 1.016309  |

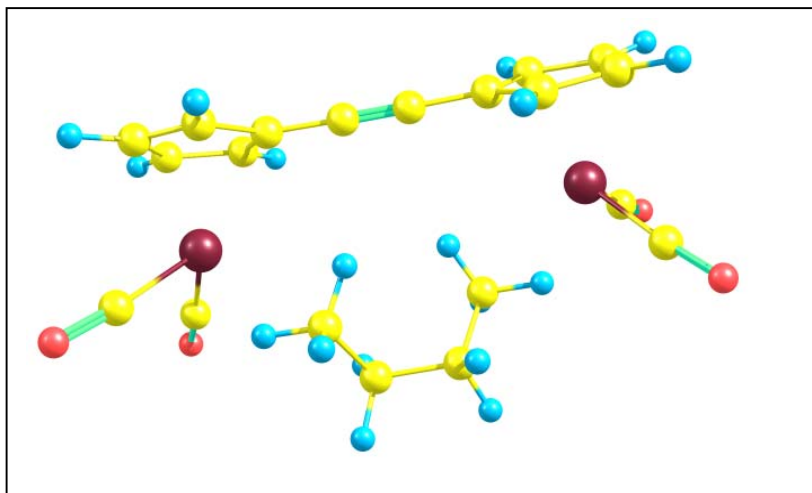

Pentane:

|    |           |           |           |
|----|-----------|-----------|-----------|
| Re | 0.240756  | 2.917776  | -0.656883 |
| C  | 1.768485  | 3.715476  | 0.148497  |
| C  | -2.735805 | -4.187693 | -2.787625 |
| C  | -0.903243 | 3.813446  | 0.578525  |
| C  | -0.812075 | 0.296731  | -2.541168 |
| C  | -0.424904 | 1.661378  | -2.571861 |
| C  | 0.921416  | 2.156316  | -2.772522 |
| H  | -2.370745 | 2.726768  | -2.306332 |
| H  | 1.791128  | 1.545241  | -2.966988 |
| C  | 0.857454  | 3.581053  | -2.737138 |
| H  | 1.690537  | 4.256104  | -2.879861 |
| C  | -0.502017 | 3.976139  | -2.504680 |
| H  | -0.875699 | 4.990085  | -2.493095 |
| C  | -1.299279 | 2.781326  | -2.442189 |
| C  | -1.142550 | -0.871459 | -2.511975 |
| O  | -5.742825 | -3.813558 | -0.313064 |
| O  | 2.726860  | 4.240431  | 0.559474  |
| O  | -1.644171 | 4.416583  | 1.249004  |
| Re | -2.736170 | -3.314988 | -0.716195 |
| H  | -3.518814 | -2.196771 | -3.510371 |
| C  | -2.290928 | -4.431355 | 0.758823  |
| C  | -4.600297 | -3.602268 | -0.418420 |
| H  | -1.174097 | -5.524402 | -1.886437 |
| C  | -1.499135 | -4.525461 | -2.142365 |
| C  | -0.744597 | -3.320127 | -1.957099 |
| H  | -3.492958 | -4.887640 | -3.112588 |
| H  | 0.244822  | -3.232529 | -1.532782 |
| C  | -1.528626 | -2.236982 | -2.488580 |
| O  | -1.968398 | -5.181286 | 1.593985  |
| C  | -2.745694 | -2.769691 | -3.018745 |
| C  | -3.162174 | -1.141106 | 1.170515  |
| H  | -4.069409 | -0.766588 | 0.694734  |
| H  | -2.514186 | -1.623041 | 0.372048  |
| H  | -3.430753 | -1.888321 | 1.918657  |
| C  | -2.323712 | -0.006064 | 1.779047  |
| H  | -2.160215 | 0.775216  | 1.027312  |
| H  | -2.937852 | 0.453322  | 2.564335  |
| C  | -0.981740 | -0.459575 | 2.384683  |
| H  | -1.134387 | -1.412119 | 2.909299  |
| H  | -0.671606 | 0.260994  | 3.153452  |
| C  | 0.167475  | -0.619532 | 1.370785  |
| H  | 0.932088  | -1.284710 | 1.793571  |
| H  | -0.189407 | -1.112172 | 0.458074  |
| C  | 0.877322  | 0.693884  | 1.008367  |
| H  | 0.069648  | 1.391273  | 0.612306  |
| H  | 1.303333  | 1.183757  | 1.886734  |
| H  | 1.667915  | 0.531481  | 0.276354  |

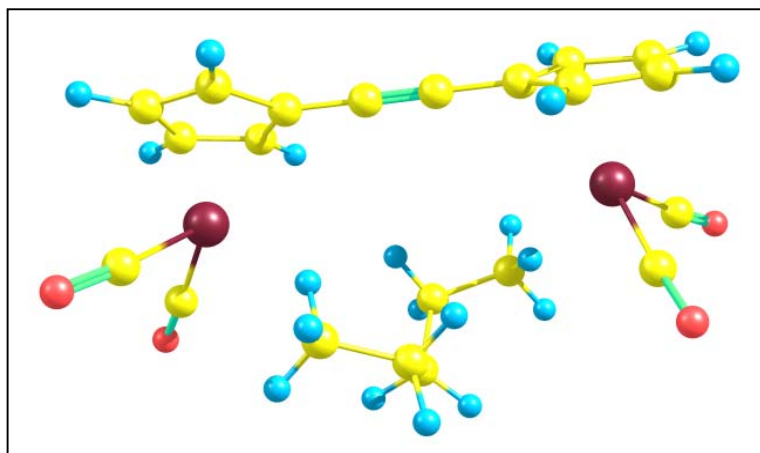

Cyclopropane:

|    |           |           |           |
|----|-----------|-----------|-----------|
| C  | -0.386323 | 0.181565  | -3.355581 |
| C  | 0.235065  | -0.883172 | -2.615474 |
| C  | 1.555001  | -1.094069 | -3.133353 |
| C  | 1.767759  | -0.128490 | -4.176415 |
| C  | 0.572469  | 0.651610  | -4.312550 |
| C  | -0.326576 | -1.543522 | -1.491637 |
| C  | -0.769799 | -2.036204 | -0.474627 |
| C  | -1.239584 | -2.551652 | 0.760242  |
| C  | -2.505948 | -2.254528 | 1.368199  |
| C  | -2.536043 | -2.914795 | 2.641784  |
| C  | -1.300287 | -3.622295 | 2.808780  |
| C  | -0.498826 | -3.411406 | 1.636459  |
| H  | -1.398199 | 0.535297  | -3.220157 |
| H  | 0.406014  | 1.424510  | -5.049924 |
| H  | 2.648573  | -0.051082 | -4.798270 |
| H  | 2.250838  | -1.848921 | -2.796641 |
| H  | 0.473450  | -3.834316 | 1.430068  |
| H  | -1.045812 | -4.260822 | 3.643392  |
| H  | -3.368910 | -2.924457 | 3.331291  |
| H  | -3.296540 | -1.668015 | 0.923004  |
| Re | -0.866989 | -1.414172 | 2.840011  |
| C  | 0.433166  | -1.586870 | 4.222784  |
| O  | 1.205700  | -1.804222 | 5.069724  |
| C  | -1.906544 | -0.234997 | 3.915151  |
| O  | -2.620323 | 0.412255  | 4.572995  |
| Re | 1.502497  | 1.106122  | -2.310709 |
| C  | 1.173508  | 2.979040  | -2.444972 |
| O  | 0.942689  | 4.108653  | -2.624968 |
| C  | 3.367628  | 1.424675  | -2.053872 |
| O  | 4.521767  | 1.568472  | -1.970277 |
| C  | 1.284299  | 0.889377  | 0.490401  |
| C  | 1.491044  | 1.818278  | 1.653501  |
| C  | 0.311590  | 0.866376  | 1.639989  |
| H  | 0.827866  | 1.358903  | -0.420746 |
| H  | 2.321899  | 1.607786  | 2.320433  |
| H  | 1.270305  | 2.874166  | 1.527932  |
| H  | 0.458461  | 0.038017  | 2.378655  |
| H  | -0.676709 | 1.290452  | 1.523533  |
| H  | 1.956591  | 0.051130  | 0.370086  |

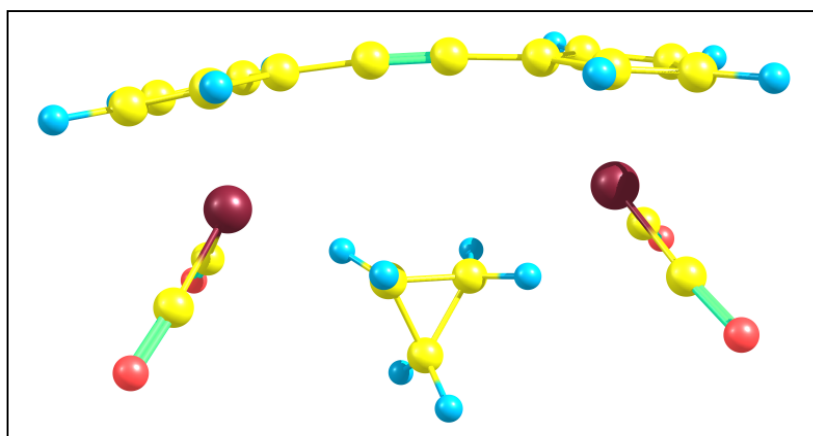

Cyclobutane:

|    |           |           |           |
|----|-----------|-----------|-----------|
| C  | -0.909504 | 0.298187  | -3.486649 |
| C  | -0.451810 | -0.840828 | -2.724295 |
| C  | 0.909378  | -1.102106 | -3.155913 |
| C  | 1.250968  | -0.194391 | -4.178090 |
| C  | 0.139070  | 0.705805  | -4.368574 |
| C  | -1.149816 | -1.544611 | -1.720043 |
| C  | -1.702409 | -2.134494 | -0.808537 |
| C  | -2.278621 | -2.746448 | 0.330420  |
| C  | -3.634569 | -2.573899 | 0.794221  |
| C  | -3.725657 | -3.194721 | 2.079984  |
| C  | -2.441896 | -3.755795 | 2.408896  |
| C  | -1.555195 | -3.506180 | 1.303968  |
| H  | -1.895694 | 0.737183  | -3.421725 |
| H  | 0.071022  | 1.482542  | -5.117460 |
| H  | 2.195046  | -0.154584 | -4.703466 |
| H  | 1.541240  | -1.885886 | -2.758991 |
| H  | -0.515461 | -3.790088 | 1.223591  |
| H  | -2.216164 | -4.335053 | 3.293088  |
| H  | -4.619750 | -3.272530 | 2.683629  |
| H  | -4.424876 | -2.077593 | 0.250240  |
| Re | -2.241568 | -1.536068 | 2.351496  |
| C  | -0.850832 | -1.453635 | 3.653960  |
| O  | 0.006771  | -1.527046 | 4.444887  |
| C  | -3.402553 | -0.449346 | 3.412150  |
| O  | -4.171237 | 0.135053  | 4.066631  |
| Re | 0.810874  | 1.077320  | -2.234505 |
| C  | -0.303744 | 2.257354  | -1.237951 |
| O  | -1.052859 | 2.947006  | -0.669304 |
| C  | 2.022655  | 2.503067  | -2.603253 |
| O  | 2.754462  | 3.353614  | -2.921445 |
| C  | 3.021971  | -0.478918 | 0.774028  |
| C  | 2.673452  | 0.140597  | 2.157635  |
| C  | 1.764210  | 1.178983  | 1.439619  |
| C  | 1.775323  | 0.253694  | 0.202829  |
| H  | 3.956297  | -0.079216 | 0.367228  |
| H  | 3.508197  | 0.534805  | 2.744137  |
| H  | 2.095097  | -0.543842 | 2.785465  |
| H  | 2.285773  | 2.121395  | 1.246764  |
| H  | 0.790519  | 1.400818  | 1.884961  |
| H  | 2.058063  | 0.762666  | -0.784841 |
| H  | 0.905420  | -0.399393 | 0.139771  |
| H  | 3.038348  | -1.569413 | 0.685983  |

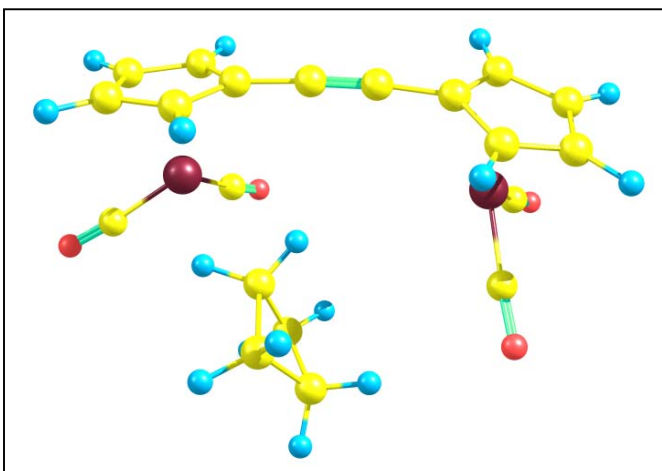

Cyclopentane:

|    |           |           |           |
|----|-----------|-----------|-----------|
| C  | 0.007508  | 0.823347  | -2.915972 |
| C  | 0.546492  | -0.295385 | -2.202402 |
| C  | 1.807752  | -0.656013 | -2.789256 |
| C  | 2.061292  | 0.271930  | -3.853443 |
| C  | 0.956936  | 1.183199  | -3.931427 |
| C  | -0.031241 | -0.894580 | -1.053636 |
| C  | -0.485426 | -1.350244 | -0.024317 |
| C  | -0.956020 | -1.801807 | 1.235717  |
| C  | -2.014298 | -1.198877 | 1.991113  |
| C  | -2.088349 | -1.884985 | 3.251461  |
| C  | -1.101031 | -2.924454 | 3.253301  |
| C  | -0.401981 | -2.884949 | 2.001386  |
| H  | -0.948032 | 1.289031  | -2.721655 |
| H  | 0.831239  | 1.960003  | -4.672740 |
| H  | 2.908900  | 0.252768  | -4.525348 |
| H  | 2.424557  | -1.492082 | -2.493577 |
| H  | 0.380965  | -3.551885 | 1.670138  |
| H  | -0.950733 | -3.651371 | 4.039647  |
| H  | -2.816680 | -1.701845 | 4.029334  |
| H  | -2.636539 | -0.381463 | 1.656676  |
| Re | -0.050041 | -0.927705 | 3.266301  |
| C  | 1.265061  | -1.481712 | 4.529084  |
| O  | 2.025031  | -1.899870 | 5.310223  |
| C  | -0.597967 | 0.492864  | 4.411922  |
| O  | -1.031618 | 1.312446  | 5.121205  |
| Re | 2.051165  | 1.541670  | -1.988563 |
| C  | 1.787040  | 3.429402  | -2.021560 |
| O  | 1.584613  | 4.572500  | -2.141049 |
| C  | 3.939446  | 1.788589  | -1.991016 |
| O  | 5.098122  | 1.901618  | -2.081349 |
| C  | 2.015277  | 0.447280  | 1.847431  |
| C  | 1.800118  | 1.668306  | 0.920412  |
| C  | 2.557172  | 2.806707  | 1.615955  |
| C  | 3.825444  | 2.115029  | 2.148077  |
| C  | 3.354239  | 0.706495  | 2.595391  |
| H  | 1.980906  | -0.499725 | 1.312489  |
| H  | 1.174770  | 0.524566  | 2.608204  |
| H  | 2.381940  | 1.410487  | -0.025263 |
| H  | 0.753860  | 1.874752  | 0.702103  |
| H  | 1.942829  | 3.176344  | 2.448203  |
| H  | 2.763747  | 3.651301  | 0.952834  |
| H  | 4.562425  | 2.030228  | 1.339973  |
| H  | 4.299865  | 2.672038  | 2.961646  |
| H  | 4.091362  | -0.066045 | 2.356742  |
| H  | 3.196401  | 0.669829  | 3.677089  |

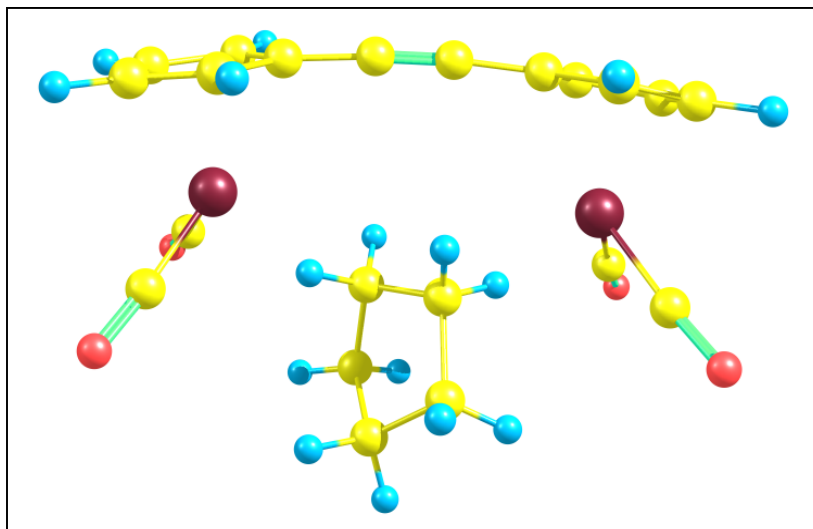

#### 4-2c. Binuclear Re, DFT(BP86).

Complex:

|    |           |           |           |
|----|-----------|-----------|-----------|
| Re | -3.102035 | -0.142472 | 0.470439  |
| C  | -3.799902 | 1.290175  | -0.582420 |
| C  | 4.208353  | -1.685867 | 0.643635  |
| C  | -3.755823 | 0.646000  | 2.081059  |
| C  | -0.613962 | -2.230409 | 0.011760  |
| C  | -2.029526 | -2.174383 | 0.019987  |
| C  | -2.853068 | -1.824127 | -1.120486 |
| H  | -2.544562 | -2.628076 | 2.175657  |
| H  | -2.491735 | -1.671098 | -2.136522 |
| C  | -4.209110 | -1.698445 | -0.643922 |
| H  | -5.083891 | -1.474708 | -1.254424 |
| C  | -4.228261 | -2.017651 | 0.772762  |
| H  | -5.120551 | -2.071861 | 1.397115  |
| C  | -2.879232 | -2.338279 | 1.180777  |
| C  | 0.616403  | -2.227718 | -0.021078 |
| O  | 4.299872  | 2.098414  | 1.296680  |
| O  | -4.300153 | 2.095915  | -1.284805 |
| O  | -4.231746 | 1.032068  | 3.089555  |
| Re | 3.100037  | -0.129695 | -0.470104 |
| H  | 2.487382  | -1.665390 | 2.131896  |
| C  | 3.749068  | 0.663644  | -2.080823 |
| C  | 3.798647  | 1.297665  | 0.589267  |
| H  | 5.125941  | -2.052171 | -1.395959 |
| C  | 4.231948  | -2.001154 | -0.773812 |
| C  | 2.884684  | -2.324837 | -1.185742 |
| H  | 5.081027  | -1.460475 | 1.256568  |
| H  | 2.553449  | -2.613302 | -2.182161 |
| C  | 2.031698  | -2.165713 | -0.026945 |
| O  | 4.221963  | 1.052247  | -3.089723 |
| C  | 2.851603  | -1.815363 | 1.116421  |

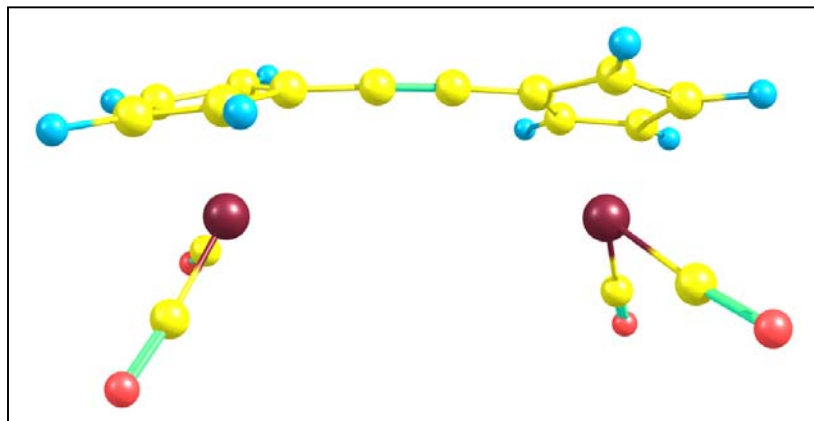



Methane:

|    |           |           |           |
|----|-----------|-----------|-----------|
| C  | -2.646156 | -1.761079 | 1.284308  |
| C  | -1.970579 | -1.950979 | -0.009275 |
| C  | -2.991799 | -1.837366 | -1.029984 |
| C  | -4.264337 | -1.611764 | -0.388718 |
| C  | -4.036827 | -1.605952 | 1.044898  |
| C  | -0.578164 | -2.078421 | -0.180423 |
| C  | 0.653062  | -2.079883 | -0.251812 |
| C  | 2.065507  | -2.015299 | -0.281850 |
| C  | 2.895572  | -1.758570 | 0.879472  |
| C  | 4.220573  | -1.451506 | 0.398816  |
| C  | 4.219093  | -1.573270 | -1.047332 |
| C  | 2.893983  | -1.954362 | -1.470399 |
| H  | -2.148572 | -1.780393 | 2.253947  |
| H  | -4.802444 | -1.448169 | 1.806092  |
| H  | -5.232637 | -1.553863 | -0.885255 |
| H  | -2.818386 | -1.930113 | -2.102332 |
| H  | 2.560093  | -2.139173 | -2.490098 |
| H  | 5.091041  | -1.471114 | -1.693201 |
| H  | 5.094152  | -1.242917 | 1.016816  |
| H  | 2.552223  | -1.756000 | 1.913386  |
| Re | 2.925052  | 0.133302  | -0.456433 |
| C  | 3.439200  | 1.258126  | -1.911839 |
| O  | 3.830030  | 1.871232  | -2.842901 |
| C  | 3.426018  | 1.449271  | 0.827843  |
| O  | 3.803410  | 2.185743  | 1.672346  |
| Re | -2.955465 | 0.177718  | 0.017257  |
| C  | -4.291558 | 1.420281  | 0.559335  |
| O  | -5.185374 | 2.107369  | 0.906637  |
| C  | -2.745684 | 1.143596  | -1.613400 |
| O  | -2.640813 | 1.663462  | -2.666206 |
| C  | -0.770144 | 1.363773  | 0.885078  |
| H  | -0.472390 | 2.362802  | 0.535319  |
| H  | -0.386923 | 1.156862  | 1.894706  |
| H  | -1.918499 | 1.465229  | 1.044714  |
| H  | -0.396044 | 0.601844  | 0.183657  |

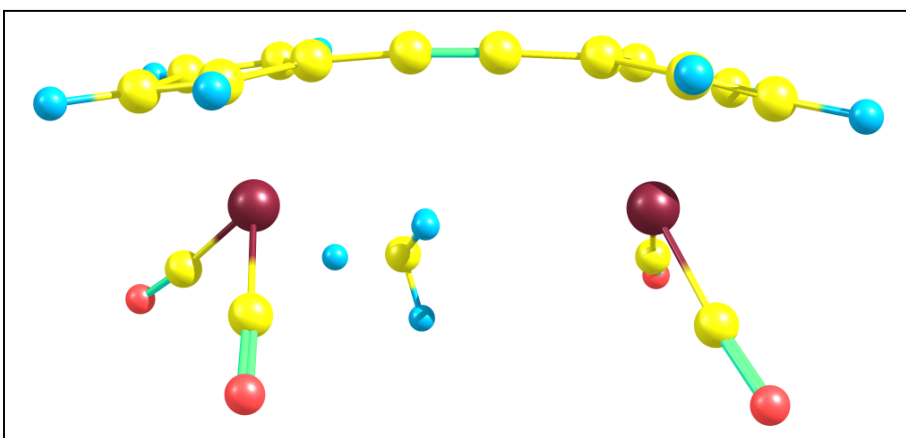

Ethane:

|    |           |           |           |
|----|-----------|-----------|-----------|
| C  | -4.139509 | 1.518207  | -1.216731 |
| C  | -2.724516 | 1.610174  | -1.484940 |
| C  | -2.069257 | 1.916961  | -0.226452 |
| C  | -3.074648 | 2.046222  | 0.798944  |
| C  | -4.358143 | 1.771215  | 0.189443  |
| H  | -4.921153 | 1.329848  | -1.953270 |
| H  | -2.227179 | 1.496838  | -2.447009 |
| H  | -2.882940 | 2.283286  | 1.845123  |
| H  | -5.328194 | 1.826037  | 0.683511  |
| C  | -0.664237 | 1.972466  | -0.025895 |
| C  | 0.549868  | 1.905401  | 0.146444  |
| C  | 1.935872  | 1.681290  | 0.354820  |
| C  | 2.963405  | 1.720296  | -0.652113 |
| C  | 4.200263  | 1.287346  | -0.036414 |
| C  | 3.934850  | 1.035009  | 1.361336  |
| C  | 2.539646  | 1.275934  | 1.616592  |
| H  | 2.021716  | 1.208012  | 2.572062  |
| H  | 2.813728  | 1.986335  | -1.698215 |
| H  | 5.176358  | 1.250120  | -0.518290 |
| H  | 4.678756  | 0.740461  | 2.102186  |
| Re | 2.841630  | -0.488538 | 0.121092  |
| C  | 3.469160  | -1.334831 | -1.469512 |
| O  | 3.929451  | -1.770288 | -2.465120 |
| C  | 3.511671  | -1.933844 | 1.161405  |
| O  | 3.989023  | -2.763017 | 1.854575  |
| Re | -3.221639 | -0.146013 | -0.030973 |
| C  | -3.945295 | -1.465619 | -1.193445 |
| O  | -4.446647 | -2.203982 | -1.967716 |
| C  | -4.032033 | -0.983984 | 1.477214  |
| O  | -4.586096 | -1.409927 | 2.428555  |
| C  | -0.868173 | -1.420854 | 0.578644  |
| C  | 0.332086  | -1.486716 | -0.380831 |
| H  | 0.371626  | -0.599894 | -1.028599 |
| H  | 1.241741  | -1.629389 | 0.317614  |
| H  | 0.328481  | -2.388117 | -1.013309 |
| H  | -1.795511 | -1.507172 | -0.103240 |
| H  | -0.830500 | -0.522327 | 1.210064  |
| H  | -0.948092 | -2.304301 | 1.232230  |

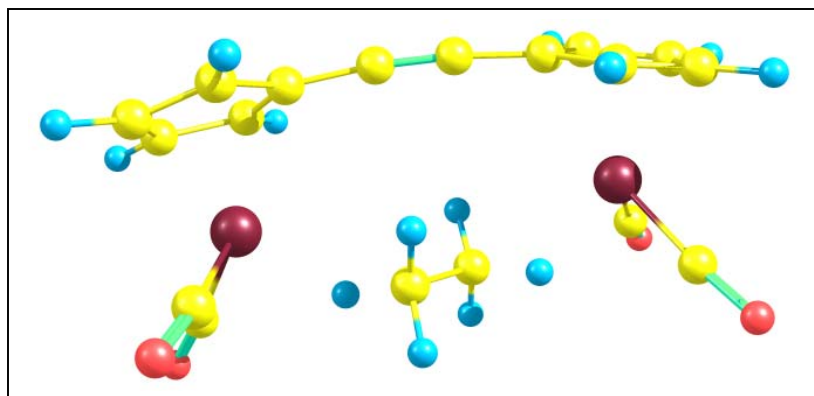

Propane:

|    |           |           |           |
|----|-----------|-----------|-----------|
| Re | 0.037516  | 2.894781  | -0.619542 |
| C  | 1.381020  | 3.526569  | 0.568411  |
| C  | -2.932659 | -4.108394 | -2.651625 |
| C  | -1.247144 | 4.052438  | 0.181723  |
| C  | -0.587195 | 0.204677  | -2.587782 |
| C  | -0.124084 | 1.544529  | -2.572030 |
| C  | 1.254793  | 1.965916  | -2.390504 |
| H  | -2.020824 | 2.713239  | -2.916633 |
| H  | 2.111189  | 1.299439  | -2.292207 |
| C  | 1.266357  | 3.405981  | -2.412312 |
| H  | 2.150485  | 4.039319  | -2.331542 |
| C  | -0.087537 | 3.875985  | -2.616255 |
| H  | -0.387788 | 4.916213  | -2.745358 |
| C  | -0.945099 | 2.717587  | -2.742839 |
| C  | -0.993091 | -0.954915 | -2.604483 |
| O  | -5.001862 | -3.810494 | 0.609959  |
| O  | 2.269007  | 3.949258  | 1.223687  |
| O  | -2.048335 | 4.825737  | 0.574384  |
| Re | -2.213507 | -3.420127 | -0.643676 |
| H  | -3.693319 | -1.987061 | -2.947536 |
| C  | -1.467608 | -4.697486 | 0.552605  |
| C  | -3.915107 | -3.635304 | 0.181838  |
| H  | -1.312348 | -5.657705 | -2.359817 |
| C  | -1.592447 | -4.606586 | -2.435524 |
| C  | -0.684321 | -3.483025 | -2.424115 |
| H  | -3.827824 | -4.719958 | -2.765597 |
| H  | 0.399445  | -3.514739 | -2.315204 |
| C  | -1.480007 | -2.285615 | -2.598033 |
| O  | -0.984557 | -5.554391 | 1.207594  |
| C  | -2.863746 | -2.670090 | -2.767602 |
| C  | -0.402721 | 0.905662  | 1.343143  |
| H  | -1.124228 | 1.200937  | 2.123926  |
| H  | 0.589540  | 1.272975  | 1.636286  |
| H  | -0.829464 | 1.410953  | 0.394551  |
| C  | -0.370725 | -0.608751 | 1.083547  |
| H  | 0.279240  | -0.820550 | 0.215980  |
| H  | 0.095172  | -1.097086 | 1.960571  |
| C  | -1.769290 | -1.193396 | 0.846528  |
| H  | -2.456294 | -1.008218 | 1.690492  |
| H  | -2.233271 | -0.785184 | -0.063389 |
| H  | -1.646509 | -2.345151 | 0.883377  |

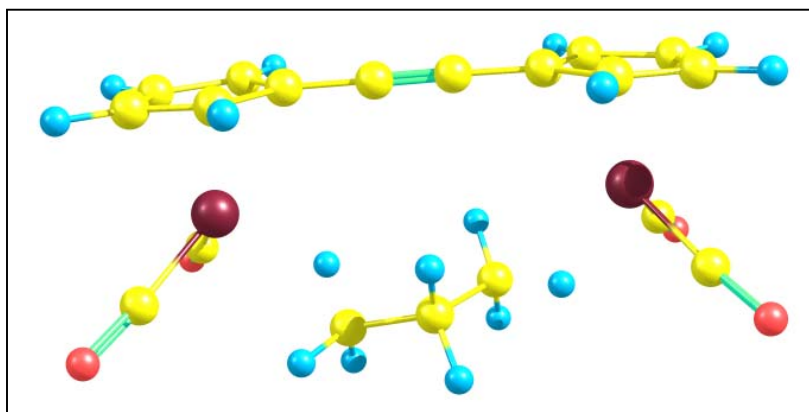

Butane:

|    |           |           |           |
|----|-----------|-----------|-----------|
| Re | 0.064194  | 3.025676  | -0.614237 |
| C  | 1.623447  | 3.819794  | 0.121869  |
| C  | -2.767549 | -4.223711 | -2.769719 |
| C  | -1.048856 | 4.029053  | 0.560594  |
| C  | -0.880494 | 0.299717  | -2.493425 |
| C  | -0.552710 | 1.680039  | -2.502353 |
| C  | 0.776150  | 2.239031  | -2.700840 |
| H  | -2.563903 | 2.654024  | -2.219137 |
| H  | 1.682738  | 1.661538  | -2.877709 |
| C  | 0.642064  | 3.673861  | -2.675301 |
| H  | 1.445284  | 4.393171  | -2.837473 |
| C  | -0.747697 | 4.002973  | -2.452678 |
| H  | -1.174642 | 5.005380  | -2.444583 |
| C  | -1.489801 | 2.764799  | -2.369166 |
| C  | -1.157010 | -0.898290 | -2.501641 |
| O  | -5.283854 | -4.139591 | 0.105973  |
| O  | 2.613404  | 4.353634  | 0.484463  |
| O  | -1.782371 | 4.704394  | 1.193738  |
| Re | -2.365274 | -3.553635 | -0.680116 |
| H  | -3.691969 | -2.174248 | -3.119418 |
| C  | -1.714253 | -4.847787 | 0.550432  |
| C  | -4.151156 | -3.898376 | -0.125048 |
| H  | -1.034682 | -5.613586 | -2.344713 |
| C  | -1.415554 | -4.594499 | -2.418926 |
| C  | -0.633097 | -3.390466 | -2.272255 |
| H  | -3.578172 | -4.911885 | -3.008561 |
| H  | 0.433090  | -3.319599 | -2.058283 |
| C  | -1.515475 | -2.271038 | -2.528866 |
| O  | -1.281830 | -5.710571 | 1.232577  |
| C  | -2.827614 | -2.781193 | -2.851789 |
| C  | -2.209694 | -1.379315 | 0.965026  |
| H  | -3.217651 | -1.018819 | 1.227503  |
| H  | -2.297186 | -2.528591 | 0.986861  |
| H  | -1.936814 | -0.950815 | -0.012043 |
| C  | -1.178671 | -1.046715 | 2.061927  |
| H  | -1.590830 | -1.347300 | 3.042604  |
| H  | -0.261469 | -1.648330 | 1.914040  |
| C  | -0.818336 | 0.454923  | 2.086370  |
| H  | -0.371466 | 0.712003  | 3.064463  |
| H  | -1.735817 | 1.066539  | 1.995140  |
| C  | 0.177268  | 0.819884  | 0.968981  |
| H  | 1.194022  | 0.451960  | 1.189997  |
| H  | -0.122292 | 0.402586  | -0.005216 |
| H  | 0.303852  | 1.967732  | 1.006914  |

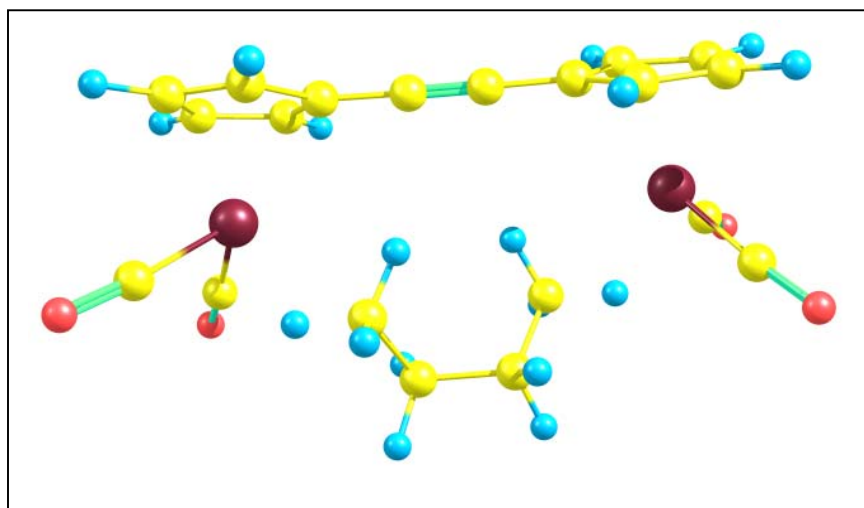

Pentane:

|    |           |           |           |
|----|-----------|-----------|-----------|
| Re | 0.223962  | 2.910189  | -0.650198 |
| C  | 1.710663  | 3.734583  | 0.196970  |
| C  | -2.767427 | -4.196535 | -2.755776 |
| C  | -0.954723 | 3.773785  | 0.572275  |
| C  | -0.817298 | 0.308032  | -2.525317 |
| C  | -0.415328 | 1.666767  | -2.555723 |
| C  | 0.953627  | 2.148367  | -2.734395 |
| H  | -2.364231 | 2.770664  | -2.319170 |
| H  | 1.826849  | 1.518751  | -2.902395 |
| C  | 0.907999  | 3.581134  | -2.694932 |
| H  | 1.761110  | 4.250545  | -2.812853 |
| C  | -0.459699 | 4.000537  | -2.484236 |
| H  | -0.819716 | 5.028819  | -2.476495 |
| C  | -1.281839 | 2.810272  | -2.446512 |
| C  | -1.153527 | -0.872805 | -2.494881 |
| O  | -5.746939 | -3.801030 | -0.273522 |
| O  | 2.659926  | 4.284163  | 0.637008  |
| O  | -1.725406 | 4.367835  | 1.242300  |
| Re | -2.731684 | -3.308193 | -0.707995 |
| H  | -3.555594 | -2.191007 | -3.483772 |
| C  | -2.277365 | -4.414760 | 0.768222  |
| C  | -4.590907 | -3.589996 | -0.391342 |
| H  | -1.196642 | -5.546635 | -1.844319 |
| C  | -1.518689 | -4.539551 | -2.109594 |
| C  | -0.750128 | -3.329874 | -1.938305 |
| H  | -3.537289 | -4.901211 | -3.070317 |
| H  | 0.245736  | -3.241288 | -1.506925 |
| C  | -1.542265 | -2.236222 | -2.468563 |
| O  | -1.942034 | -5.172739 | 1.611417  |
| C  | -2.772312 | -2.771786 | -2.998141 |
| C  | -3.160721 | -1.167201 | 1.154454  |
| H  | -4.075786 | -0.803651 | 0.666177  |
| H  | -2.484110 | -1.647916 | 0.352031  |
| H  | -3.421548 | -1.918254 | 1.913899  |
| C  | -2.317370 | -0.020497 | 1.746173  |
| H  | -2.166391 | 0.764324  | 0.981703  |
| H  | -2.931656 | 0.443295  | 2.541742  |
| C  | -0.961157 | -0.465442 | 2.337875  |
| H  | -1.099488 | -1.428429 | 2.866637  |
| H  | -0.643764 | 0.261666  | 3.110832  |
| C  | 0.175855  | -0.612379 | 1.301899  |
| H  | 0.958997  | -1.281743 | 1.708005  |
| H  | -0.196046 | -1.105454 | 0.383877  |
| C  | 0.877724  | 0.712670  | 0.943981  |
| H  | 0.024483  | 1.427538  | 0.623616  |
| H  | 1.346582  | 1.181997  | 1.822246  |
| H  | 1.636341  | 0.574007  | 0.161954  |

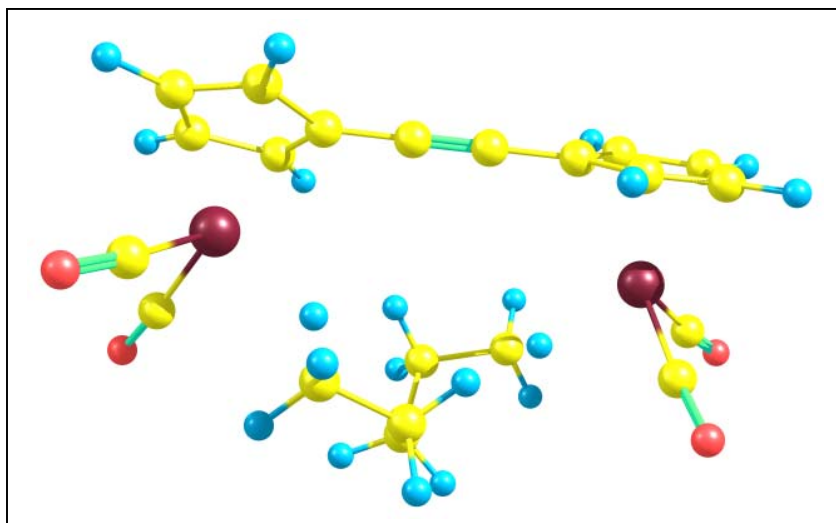

Cyclopropane:

|    |           |           |           |
|----|-----------|-----------|-----------|
| C  | -0.368521 | 0.184397  | -3.411961 |
| C  | 0.243956  | -0.908910 | -2.680877 |
| C  | 1.604915  | -1.068418 | -3.139426 |
| C  | 1.854686  | -0.033672 | -4.118536 |
| C  | 0.639909  | 0.730033  | -4.288210 |
| C  | -0.337252 | -1.594136 | -1.581107 |
| C  | -0.771343 | -2.051856 | -0.528569 |
| C  | -1.210973 | -2.524681 | 0.731740  |
| C  | -2.477621 | -2.219571 | 1.359109  |
| C  | -2.474965 | -2.841290 | 2.662523  |
| C  | -1.215722 | -3.529437 | 2.829874  |
| C  | -0.433549 | -3.346022 | 1.629810  |
| H  | -1.399286 | 0.519434  | -3.305574 |
| H  | 0.495037  | 1.543054  | -5.000167 |
| H  | 2.776461  | 0.098401  | -4.684565 |
| H  | 2.309253  | -1.818445 | -2.782071 |
| H  | 0.545608  | -3.771426 | 1.413803  |
| H  | -0.932858 | -4.137017 | 3.689865  |
| H  | -3.301167 | -2.840874 | 3.373965  |
| H  | -3.286819 | -1.647944 | 0.906668  |
| Re | -0.830869 | -1.327161 | 2.793808  |
| C  | 0.460723  | -1.480779 | 4.180376  |
| O  | 1.236892  | -1.698621 | 5.044123  |
| C  | -1.893707 | -0.175515 | 3.865249  |
| O  | -2.635635 | 0.455108  | 4.534335  |
| Re | 1.425264  | 1.069878  | -2.212783 |
| C  | 1.081341  | 2.940964  | -2.257412 |
| O  | 0.849267  | 4.091588  | -2.393295 |
| C  | 3.261031  | 1.413162  | -1.825020 |
| O  | 4.418976  | 1.578245  | -1.667946 |
| C  | 1.077773  | 0.633185  | 0.398409  |
| C  | 1.570480  | 1.622671  | 1.412100  |
| C  | 0.255548  | 0.884716  | 1.665478  |
| H  | 0.454045  | 1.006995  | -0.489804 |
| H  | 2.448827  | 1.342631  | 2.002217  |
| H  | 1.493283  | 2.689163  | 1.181117  |
| H  | 0.409726  | 0.209133  | 2.572202  |
| H  | -0.667298 | 1.463232  | 1.615671  |
| H  | 1.559349  | -0.341534 | 0.323117  |

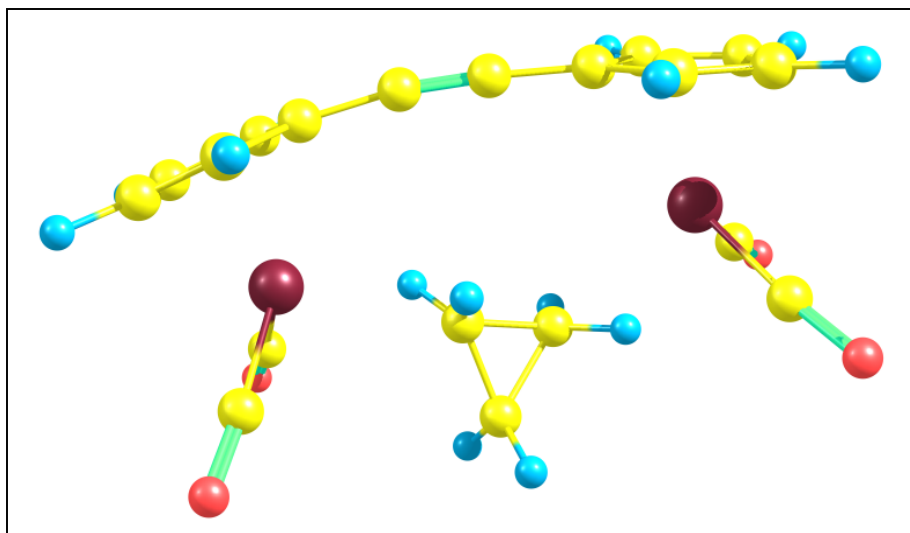

Cyclobutane:

|    |           |           |           |
|----|-----------|-----------|-----------|
| C  | -0.913676 | 0.269704  | -3.335364 |
| C  | -0.392197 | -0.845712 | -2.551384 |
| C  | 0.978914  | -1.059026 | -3.010181 |
| C  | 1.260054  | -0.166921 | -4.079222 |
| C  | 0.102158  | 0.688224  | -4.264918 |
| C  | -1.048174 | -1.543058 | -1.515940 |
| C  | -1.604336 | -2.125725 | -0.582819 |
| C  | -2.264655 | -2.768962 | 0.489198  |
| C  | -3.693438 | -2.724844 | 0.741696  |
| C  | -3.923813 | -3.344744 | 2.023161  |
| C  | -2.646908 | -3.796640 | 2.548228  |
| C  | -1.623534 | -3.468249 | 1.580113  |
| H  | -1.922234 | 0.675570  | -3.254751 |
| H  | -0.012895 | 1.451624  | -5.034505 |
| H  | 2.197649  | -0.103257 | -4.631291 |
| H  | 1.658178  | -1.810755 | -2.604334 |
| H  | -0.556284 | -3.670173 | 1.659026  |
| H  | -2.504690 | -4.357955 | 3.471537  |
| H  | -4.893919 | -3.501375 | 2.495296  |
| H  | -4.437428 | -2.290097 | 0.075522  |
| Re | -2.660631 | -1.591649 | 2.490084  |
| C  | -1.651380 | -1.382563 | 4.093382  |
| O  | -1.031914 | -1.373054 | 5.100314  |
| C  | -4.122376 | -0.612061 | 3.219611  |
| O  | -5.096876 | -0.110637 | 3.661197  |
| Re | 0.809559  | 1.129749  | -2.172938 |
| C  | -0.320454 | 2.257946  | -1.137717 |
| O  | -1.091571 | 2.927520  | -0.546819 |
| C  | 1.860884  | 2.642618  | -2.654241 |
| O  | 2.492785  | 3.559197  | -3.046903 |
| C  | 3.410161  | -0.348468 | 0.297422  |
| C  | 3.278761  | 0.054976  | 1.799623  |
| C  | 2.226123  | 1.136774  | 1.401581  |
| C  | 2.053259  | 0.377646  | 0.056804  |
| H  | 4.251004  | 0.168022  | -0.196701 |
| H  | 4.193571  | 0.409565  | 2.302490  |
| H  | 2.831771  | -0.753392 | 2.402556  |
| H  | 2.693716  | 2.125242  | 1.255279  |
| H  | 1.331782  | 1.254533  | 2.033982  |
| H  | 2.156942  | 1.101244  | -0.857756 |
| H  | 1.196944  | -0.314065 | 0.058538  |
| H  | 3.459110  | -1.422763 | 0.051687  |

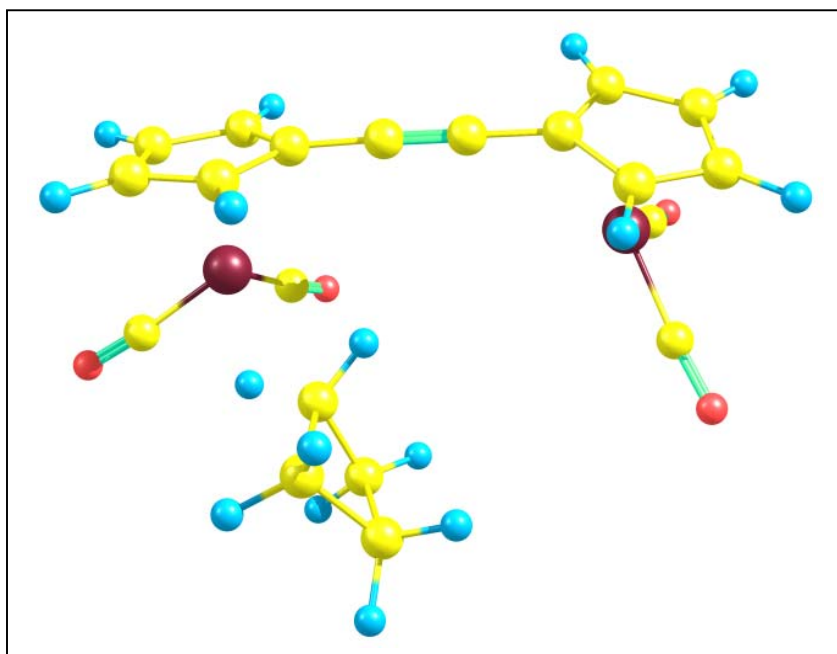

Cyclopentane:

|    |           |           |           |
|----|-----------|-----------|-----------|
| C  | 0.014714  | 0.851639  | -2.915118 |
| C  | 0.560290  | -0.281730 | -2.207668 |
| C  | 1.846236  | -0.619267 | -2.786787 |
| C  | 2.110441  | 0.345277  | -3.826948 |
| C  | 0.988336  | 1.252729  | -3.905549 |
| C  | -0.018881 | -0.898100 | -1.068483 |
| C  | -0.469516 | -1.357930 | -0.023520 |
| C  | -0.925392 | -1.800262 | 1.244682  |
| C  | -2.005042 | -1.206871 | 1.995782  |
| C  | -2.055507 | -1.867400 | 3.281903  |
| C  | -1.035681 | -2.890602 | 3.301373  |
| C  | -0.336144 | -2.862881 | 2.039623  |
| H  | -0.952827 | 1.311747  | -2.718412 |
| H  | 0.867776  | 2.052706  | -4.636033 |
| H  | 2.980644  | 0.355412  | -4.484445 |
| H  | 2.478468  | -1.452794 | -2.484576 |
| H  | 0.471934  | -3.518845 | 1.717798  |
| H  | -0.859380 | -3.594885 | 4.114890  |
| H  | -2.791201 | -1.682688 | 4.064920  |
| H  | -2.640836 | -0.394041 | 1.647665  |
| Re | -0.048714 | -0.876945 | 3.246690  |
| C  | 1.224423  | -1.360920 | 4.574825  |
| O  | 1.968596  | -1.746748 | 5.407958  |
| C  | -0.630992 | 0.599370  | 4.298267  |
| O  | -1.095717 | 1.463732  | 4.956343  |
| Re | 2.024687  | 1.553221  | -1.938176 |
| C  | 1.718430  | 3.433324  | -1.911159 |
| O  | 1.489697  | 4.588542  | -2.003863 |
| C  | 3.903385  | 1.848418  | -1.914545 |
| O  | 5.074538  | 1.988122  | -1.995263 |
| C  | 1.969746  | 0.368771  | 1.847224  |
| C  | 1.757037  | 1.571751  | 0.887088  |
| C  | 2.536629  | 2.716479  | 1.553163  |
| C  | 3.815787  | 2.022921  | 2.074240  |
| C  | 3.358583  | 0.601777  | 2.518545  |
| H  | 1.864967  | -0.609659 | 1.354957  |
| H  | 1.176917  | 0.557579  | 2.674161  |
| H  | 2.362663  | 1.241540  | -0.054438 |
| H  | 0.702302  | 1.780782  | 0.665051  |
| H  | 1.932006  | 3.105676  | 2.395809  |
| H  | 2.738384  | 3.552330  | 0.864382  |
| H  | 4.552740  | 1.948120  | 1.253740  |
| H  | 4.295410  | 2.583772  | 2.893933  |
| H  | 4.075824  | -0.176282 | 2.206367  |
| H  | 3.270760  | 0.530844  | 3.615085  |

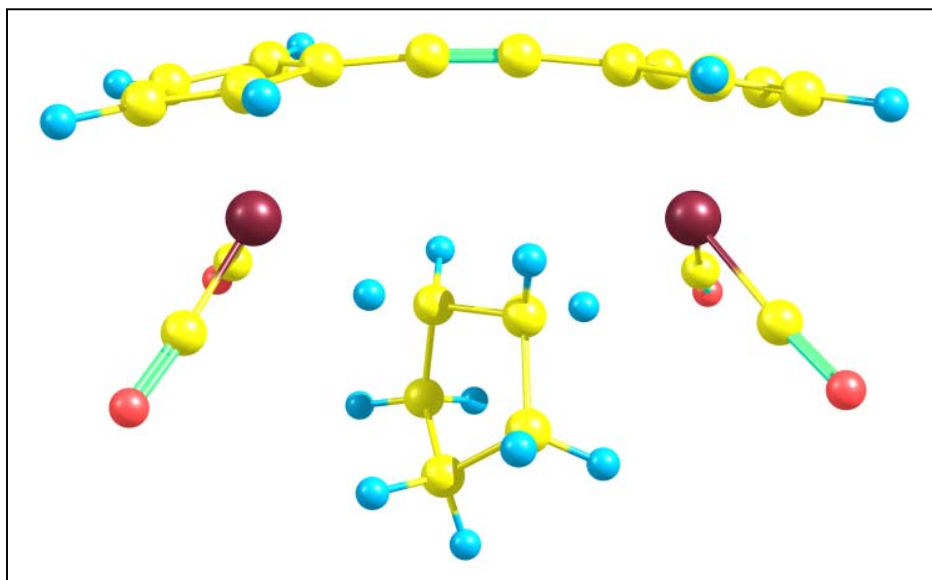



Cyclohexane:

|    |           |           |           |
|----|-----------|-----------|-----------|
| C  | -1.11279  | .081104   | -3.314264 |
| C  | .335825   | -.974442  | -2.428375 |
| C  | 1.732237  | -1.240311 | -2.685075 |
| C  | 2.170831  | -.303762  | -3.694042 |
| C  | 1.033160  | .500176   | -4.086084 |
| C  | -.426060  | -1.595449 | -1.408255 |
| C  | -1.003297 | -2.093137 | -.446490  |
| C  | -1.579499 | -2.631883 | .730238   |
| C  | -2.797437 | -2.181250 | 1.371246  |
| C  | -2.918547 | -2.909685 | 2.611848  |
| C  | -1.792746 | -3.811741 | 2.725656  |
| C  | -.975211  | -3.663114 | 1.543136  |
| H  | -1.124454 | .475858   | -3.370498 |
| H  | 1.032089  | 1.255508  | -4.871523 |
| H  | 3.160483  | -.268863  | -4.149734 |
| H  | 2.330025  | -2.003319 | -2.188493 |
| H  | -.064125  | -4.206289 | 1.296478  |
| H  | -1.640166 | -4.544767 | 3.518277  |
| H  | -3.743791 | -2.834457 | 3.320816  |
| H  | -3.485699 | -1.436676 | .974062   |
| Re | -1.048641 | -1.719368 | 2.847937  |
| C  | .271546   | -2.130457 | 4.158998  |
| O  | 1.050951  | -2.481806 | 4.974175  |
| C  | -1.878728 | -.491797  | 4.042155  |
| O  | -2.484453 | .207399   | 4.777947  |
| Re | 1.575542  | .984072   | -1.967156 |
| C  | 1.316656  | 2.846932  | -2.234952 |
| O  | 1.131916  | 3.984081  | -2.502521 |
| C  | 3.371036  | 1.275782  | -1.408392 |
| O  | 4.518860  | 1.406362  | -1.158656 |
| C  | .557797   | 2.873154  | 1.059354  |
| C  | 1.950307  | 3.128503  | 1.666909  |
| C  | 2.196576  | 2.259472  | 2.915349  |
| C  | 1.973528  | .759085   | 2.623968  |
| C  | .571493   | .548979   | 2.026534  |
| C  | .342812   | 1.380716  | .748410   |
| H  | -.224639  | 3.174785  | 1.786523  |
| H  | 2.722476  | 2.901542  | .906982   |
| H  | 2.059453  | 4.199709  | 1.917521  |
| H  | 3.223317  | 2.417229  | 3.293300  |
| H  | 1.508322  | 2.573700  | 3.726284  |
| H  | 2.736096  | .397491   | 1.905347  |
| H  | 2.087212  | .162624   | 3.545881  |
| H  | -.185438  | .882986   | 2.757898  |
| H  | .421386   | -.564264  | 1.797879  |
| H  | 1.155372  | 1.023894  | -.002465  |
| H  | -.651150  | 1.179050  | .318544   |
| H  | .405895   | 3.477594  | .150100   |

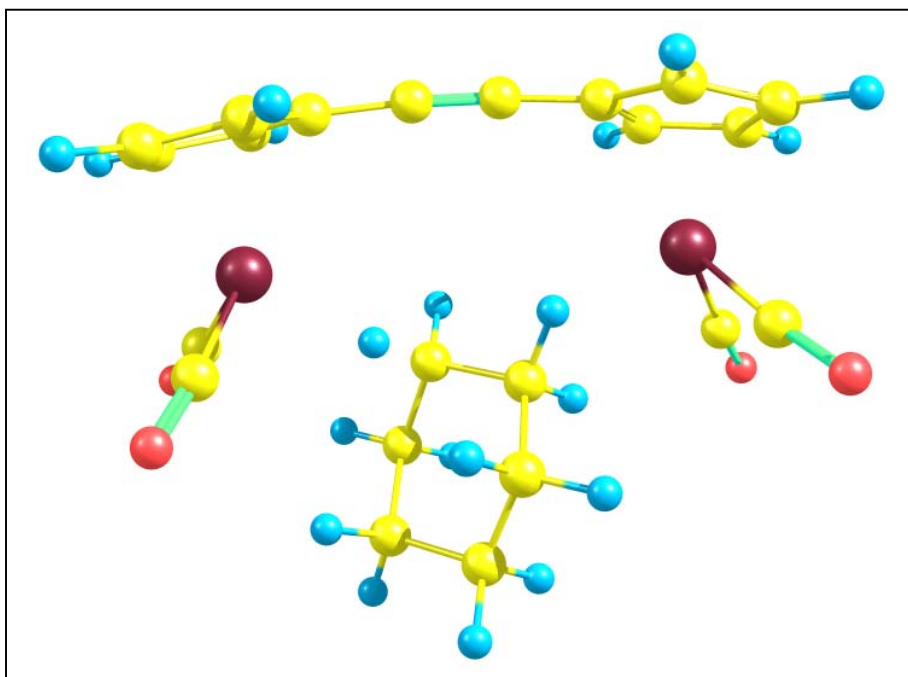

## 4-2d. Binuclear Re, RIMP2.

Complex:

|    |           |           |           |
|----|-----------|-----------|-----------|
| Re | -3.519449 | -.323761  | 1.023513  |
| C  | -4.481266 | 1.260154  | .674430   |
| C  | 4.150613  | -1.148422 | .887952   |
| C  | -4.572914 | -.630031  | 2.556056  |
| C  | -.609762  | -1.621914 | -.071766  |
| C  | -2.020642 | -1.597797 | -.148360  |
| C  | -2.777630 | -.842463  | -1.103233 |
| H  | -2.595260 | -3.243843 | 1.262541  |
| H  | -2.370146 | -.142730  | -1.821537 |
| C  | -4.157573 | -1.168298 | -.895055  |
| H  | -4.992813 | -.797530  | -1.475797 |
| C  | -4.232560 | -2.184989 | .119931   |
| H  | -5.132045 | -2.707184 | .420632   |
| C  | -2.897448 | -2.498164 | .538392   |
| C  | .611256   | -1.622200 | .042413   |
| O  | 5.022306  | 2.247959  | -.340539  |
| O  | -5.147652 | 2.183752  | .357643   |
| O  | -5.298257 | -.917233  | 3.444367  |
| Re | 3.525123  | -.328227  | -1.044725 |
| H  | 2.349672  | -.119124  | 1.784068  |
| C  | 4.648459  | -.615381  | -2.530784 |
| C  | 4.408141  | 1.295097  | -.675387  |
| H  | 5.142288  | -2.698133 | -.400984  |
| C  | 4.237404  | -2.177955 | -.112946  |
| C  | 2.908786  | -2.500698 | -.542199  |
| H  | 4.978373  | -.769389  | 1.473867  |
| H  | 2.616351  | -3.257958 | -1.258183 |
| C  | 2.021549  | -1.594816 | .127191   |
| O  | 5.417127  | -.887907  | -3.386831 |
| C  | 2.766487  | -.827883  | 1.079982  |

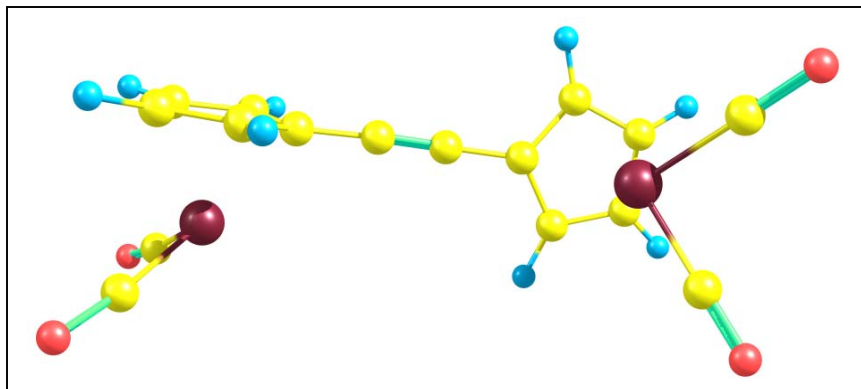

Methane:

|    |           |           |           |
|----|-----------|-----------|-----------|
| C  | -2.805370 | -1.878211 | 1.254931  |
| C  | -2.033060 | -2.142106 | .071199   |
| C  | -2.856790 | -1.938866 | -1.082103 |
| C  | -4.114573 | -1.433347 | -.616602  |
| C  | -4.083111 | -1.408301 | .817741   |
| C  | -.656737  | -2.452881 | .047061   |
| C  | .566280   | -2.321298 | .005318   |
| C  | 1.953949  | -2.090568 | -.041656  |
| C  | 2.754242  | -1.723309 | 1.097237  |
| C  | 3.977279  | -1.185880 | .586625   |
| C  | 3.934284  | -1.226933 | -.846393  |
| C  | 2.684778  | -1.809056 | -1.240579 |
| H  | -2.466947 | -2.012562 | 2.274308  |
| H  | -4.918518 | -1.153382 | 1.457910  |
| H  | -4.983220 | -1.229720 | -1.229478 |
| H  | -2.559874 | -2.110833 | -2.109254 |
| H  | 2.349059  | -2.019661 | -2.248289 |
| H  | 4.755634  | -.979580  | -1.506468 |
| H  | 4.829469  | -.874716  | 1.177870  |
| H  | 2.485245  | -1.880511 | 2.133707  |
| Re | 2.382566  | .188567   | -.131899  |
| C  | 2.599196  | 1.390522  | -1.565460 |
| O  | 2.816059  | 2.102632  | -2.484128 |
| C  | 2.988976  | 1.552906  | 1.007715  |
| O  | 3.473304  | 2.354062  | 1.732973  |
| Re | -2.620780 | .077419   | .030725   |
| C  | -3.236766 | 1.382017  | 1.234118  |
| O  | -3.720286 | 2.139258  | 2.005681  |
| C  | -3.009684 | 1.279570  | -1.365106 |
| O  | -3.331482 | 1.987721  | -2.256009 |
| C  | -.150139  | .938471   | -.168443  |
| H  | -.177684  | 1.922698  | -.623324  |
| H  | .685028   | .893595   | .621755   |
| H  | -.933194  | .876989   | .675474   |
| H  | -.160920  | .145714   | -.913989  |

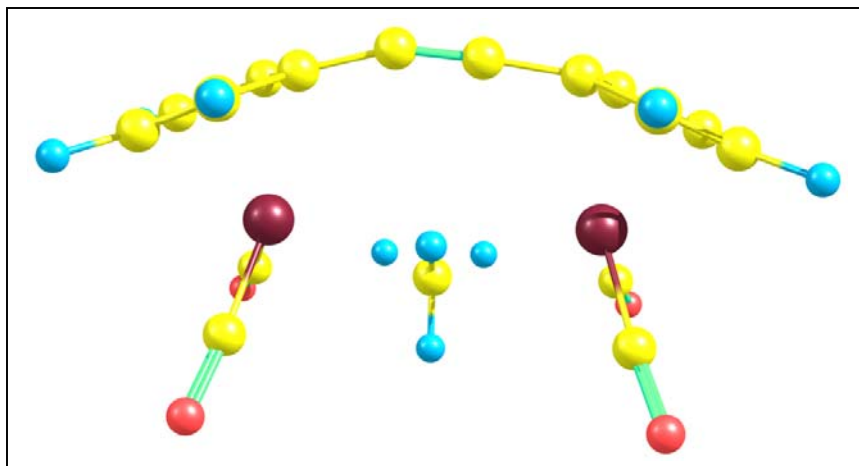

Ethane:

|    |           |           |           |
|----|-----------|-----------|-----------|
| C  | -4.061081 | 1.333104  | -1.122842 |
| C  | -2.673348 | 1.571407  | -1.394196 |
| C  | -2.050226 | 1.899218  | -.148514  |
| C  | -3.053027 | 1.968913  | .875736   |
| C  | -4.291105 | 1.576338  | .270601   |
| H  | -4.824221 | 1.116694  | -1.859508 |
| H  | -2.174230 | 1.510403  | -2.353315 |
| H  | -2.889622 | 2.261307  | 1.905245  |
| H  | -5.258146 | 1.564535  | .757708   |
| C  | -.668238  | 2.135240  | .019224   |
| C  | .548180   | 2.062931  | .176270   |
| C  | 1.898693  | 1.677928  | .322618   |
| C  | 2.889097  | 1.673171  | -.713412  |
| C  | 4.087013  | 1.130063  | -.142537  |
| C  | 3.849073  | .870907   | 1.246524  |
| C  | 2.498339  | 1.245016  | 1.549373  |
| H  | 2.010120  | 1.212373  | 2.515289  |
| H  | 2.742566  | 2.010394  | -1.731796 |
| H  | 5.041566  | 1.035787  | -.644583  |
| H  | 4.594200  | .549202   | 1.963096  |
| Re | 2.599113  | -.510256  | .036808   |
| C  | 3.424896  | -1.482327 | -1.346274 |
| O  | 4.032539  | -2.025567 | -2.203792 |
| C  | 2.942513  | -1.929999 | 1.216779  |
| O  | 3.239938  | -2.760438 | 2.007588  |
| Re | -2.982221 | -.208627  | .061078   |
| C  | -3.359537 | -1.545426 | -1.202637 |
| O  | -3.663193 | -2.316549 | -2.049132 |
| C  | -3.998450 | -1.148969 | 1.334537  |
| O  | -4.720142 | -1.662100 | 2.119343  |
| C  | -.646317  | -1.073001 | .724673   |
| C  | .162356   | -1.123283 | -.560133  |
| H  | .217105   | -.159871  | -1.064661 |
| H  | 1.156226  | -1.690535 | -.421032  |
| H  | -.270063  | -1.821045 | -1.286766 |
| H  | -1.698930 | -1.529243 | .603303   |
| H  | -.594133  | -.106533  | 1.223253  |
| H  | -.291733  | -1.809515 | 1.455862  |

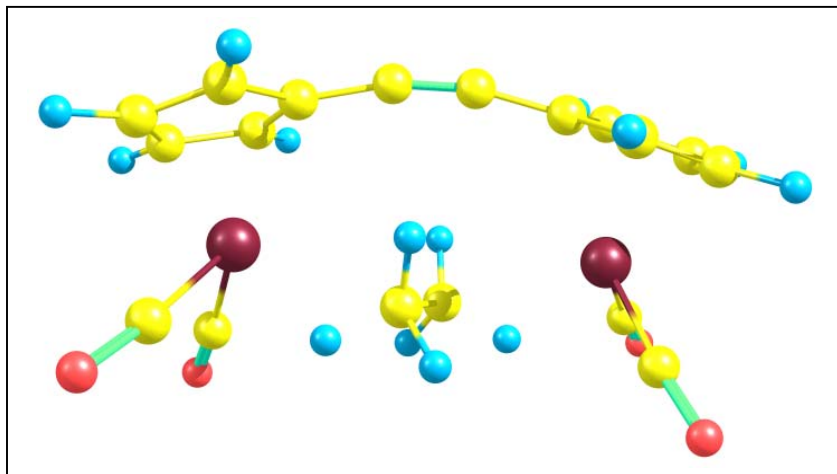

Propane:

|    |           |           |           |
|----|-----------|-----------|-----------|
| Re | .005235   | 2.775416  | -.563781  |
| C  | 1.226348  | 3.544676  | .641526   |
| C  | -2.852820 | -4.080377 | -2.546069 |
| C  | -1.363415 | 3.763298  | .268341   |
| C  | -.558031  | .222327   | -2.616700 |
| C  | -.122534  | 1.556856  | -2.486651 |
| C  | 1.249070  | 1.985696  | -2.349059 |
| H  | -2.012693 | 2.698798  | -2.851005 |
| H  | 2.112121  | 1.335780  | -2.281924 |
| C  | 1.234087  | 3.413118  | -2.315869 |
| H  | 2.103797  | 4.053607  | -2.233304 |
| C  | -.114389  | 3.866304  | -2.500869 |
| H  | -.424521  | 4.895821  | -2.621324 |
| C  | -.944167  | 2.711563  | -2.674198 |
| C  | -.960942  | -.936845  | -2.636940 |
| O  | -5.027513 | -3.965869 | .523080   |
| O  | 2.031226  | 4.081432  | 1.324332  |
| O  | -2.225503 | 4.443672  | .709108   |
| Re | -2.259149 | -3.252658 | -.572804  |
| H  | -3.617765 | -2.015174 | -3.044963 |
| C  | -1.470113 | -4.363585 | .719382   |
| C  | -3.949061 | -3.650390 | .151836   |
| H  | -1.234401 | -5.574158 | -2.114239 |
| C  | -1.531801 | -4.539775 | -2.231230 |
| C  | -.651202  | -3.409493 | -2.242045 |
| H  | -3.717345 | -4.713182 | -2.702799 |
| H  | .418889   | -3.413629 | -2.076420 |
| C  | -1.453342 | -2.248866 | -2.489126 |
| O  | -.957688  | -5.140317 | 1.452994  |
| C  | -2.801479 | -2.664614 | -2.755110 |
| C  | -.087267  | .677450   | 1.136517  |
| H  | -.466949  | .969982   | 2.118328  |
| H  | .984400   | .863355   | 1.108108  |
| H  | -.726510  | 1.305333  | .417772   |
| C  | -.414996  | -.771081  | .780223   |
| H  | .099690   | -1.051699 | -.141714  |
| H  | -.022710  | -1.417829 | 1.573536  |
| C  | -1.908588 | -1.002388 | .614856   |
| H  | -2.491338 | -.492758  | 1.393683  |
| H  | -2.291534 | -.632448  | -.338098  |
| H  | -2.213242 | -2.069378 | .927619   |

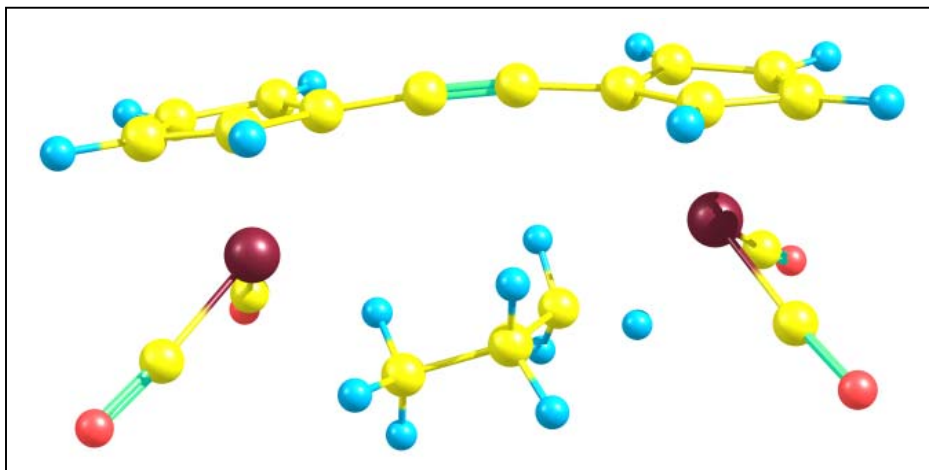

Butane:

|    |           |           |           |
|----|-----------|-----------|-----------|
| Re | .161783   | 2.859326  | -.564988  |
| C  | 1.780278  | 3.620083  | .006078   |
| C  | -2.553675 | -4.274408 | -2.670775 |
| C  | -.719648  | 3.796781  | .802265   |
| C  | -.919212  | .322706   | -2.536937 |
| C  | -.625489  | 1.697451  | -2.411632 |
| C  | .606785   | 2.330012  | -2.789679 |
| H  | -2.625394 | 2.530579  | -1.839455 |
| H  | 1.492361  | 1.824345  | -3.152655 |
| C  | .432604   | 3.736286  | -2.585391 |
| H  | 1.161947  | 4.503904  | -2.812535 |
| C  | -.915374  | 3.971548  | -2.156567 |
| H  | -1.374309 | 4.942345  | -2.019495 |
| C  | -1.587982 | 2.707735  | -2.094716 |
| C  | -1.155362 | -.882215  | -2.542472 |
| O  | -5.188128 | -4.479109 | .008225   |
| O  | 2.794354  | 4.168251  | .278149   |
| O  | -1.314756 | 4.449317  | 1.591513  |
| Re | -2.402171 | -3.393478 | -.641115  |
| H  | -3.535208 | -2.344606 | -3.314298 |
| C  | -1.700235 | -4.426181 | .760626   |
| C  | -4.115512 | -4.018835 | -.190957  |
| H  | -.812252  | -5.508550 | -1.977287 |
| C  | -1.241360 | -4.530106 | -2.152502 |
| C  | -.550514  | -3.279173 | -2.046245 |
| H  | -3.277439 | -5.029844 | -2.949841 |
| H  | .471584   | -3.120298 | -1.726077 |
| C  | -1.472588 | -2.253320 | -2.434139 |
| O  | -1.220343 | -5.144075 | 1.571477  |
| C  | -2.684400 | -2.865571 | -2.894000 |
| C  | -2.407388 | -1.160729 | .714091   |
| H  | -3.291514 | -.529279  | .855552   |
| H  | -2.884696 | -2.196712 | .813912   |
| H  | -1.985077 | -.890327  | -.254308  |
| C  | -1.401206 | -.998256  | 1.848263  |
| H  | -1.900653 | -1.206246 | 2.801194  |
| H  | -.608302  | -1.746211 | 1.741576  |
| C  | -.798149  | .406270   | 1.878332  |
| H  | -.308169  | .577616   | 2.843384  |
| H  | -1.590901 | 1.156807  | 1.793252  |
| C  | .218701   | .611563   | .760756   |
| H  | 1.114711  | -.002831  | .902871   |
| H  | -.185307  | .346248   | -.216783  |
| H  | .674925   | 1.655540  | .879304   |

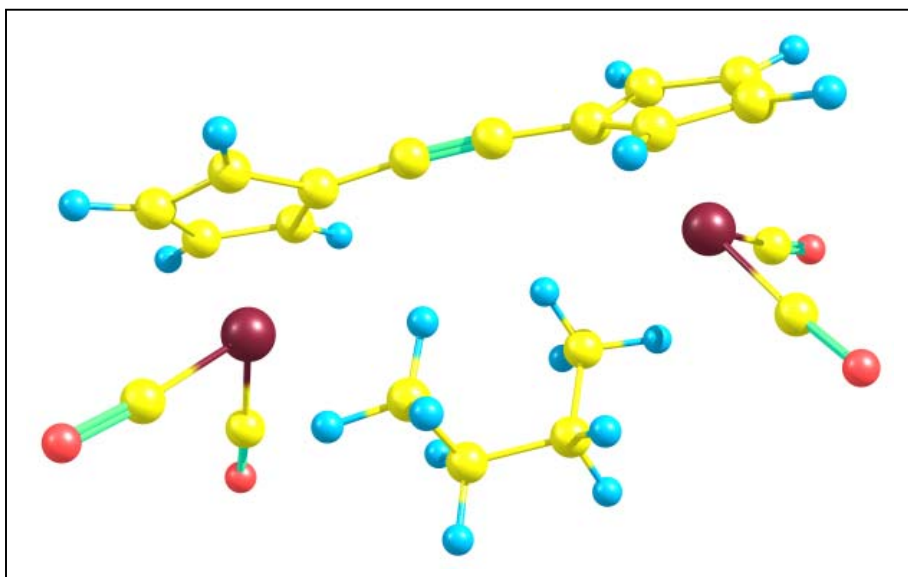

Pentane:

|    |           |           |           |
|----|-----------|-----------|-----------|
| Re | .362139   | 2.657461  | -.506521  |
| C  | 2.014959  | 3.302476  | .115868   |
| C  | -2.827025 | -4.170670 | -2.634865 |
| C  | -.482837  | 3.398431  | .997880   |
| C  | -.956841  | .346925   | -2.504518 |
| C  | -.560530  | 1.694202  | -2.356717 |
| C  | .706795   | 2.250963  | -2.758502 |
| H  | -2.462091 | 2.656865  | -1.667572 |
| H  | 1.538360  | 1.696362  | -3.173898 |
| C  | .653265   | 3.651617  | -2.474850 |
| H  | 1.439262  | 4.368786  | -2.677420 |
| C  | -.655174  | 3.971303  | -1.979872 |
| H  | -1.028991 | 4.966168  | -1.774992 |
| C  | -1.427681 | 2.764411  | -1.970141 |
| C  | -1.287759 | -.834420  | -2.516424 |
| O  | -5.230680 | -4.364032 | .341412   |
| O  | 3.053882  | 3.775595  | .430052   |
| O  | -1.061617 | 3.915590  | 1.894114  |
| Re | -2.527235 | -3.284860 | -.608147  |
| H  | -3.772097 | -2.201765 | -3.202849 |
| C  | -1.703322 | -4.204198 | .807263   |
| C  | -4.184144 | -3.915952 | .015657   |
| H  | -1.102494 | -5.478095 | -2.038777 |
| C  | -1.503276 | -4.482738 | -2.181482 |
| C  | -.760027  | -3.260167 | -2.108708 |
| H  | -3.597590 | -4.894789 | -2.868729 |
| H  | .278884   | -3.143009 | -1.826251 |
| C  | -1.662168 | -2.191528 | -2.419151 |
| O  | -1.148491 | -4.848640 | 1.632204  |
| C  | -2.919320 | -2.756814 | -2.832737 |
| C  | -3.163609 | -1.019201 | .621228   |
| H  | -3.760868 | -.912885  | -.283829  |
| H  | -2.335748 | -1.820042 | .587038   |
| H  | -3.816093 | -1.305520 | 1.447360  |
| C  | -2.365399 | .249972   | .922607   |
| H  | -1.857021 | .591227   | .016044   |
| H  | -3.082210 | 1.036839  | 1.187898  |
| C  | -1.347685 | .065131   | 2.049499  |
| H  | -1.803157 | -.535309  | 2.847072  |
| H  | -1.107385 | 1.038928  | 2.491493  |
| C  | -.055385  | -.603084  | 1.571194  |
| H  | .466124   | -1.064512 | 2.418132  |
| H  | -.286301  | -1.415363 | .871833   |
| C  | .913677   | .386885   | .925511   |
| H  | .313527   | .840530   | .067143   |
| H  | 1.254395  | 1.128930  | 1.645025  |
| H  | 1.777754  | -.092661  | .463039   |

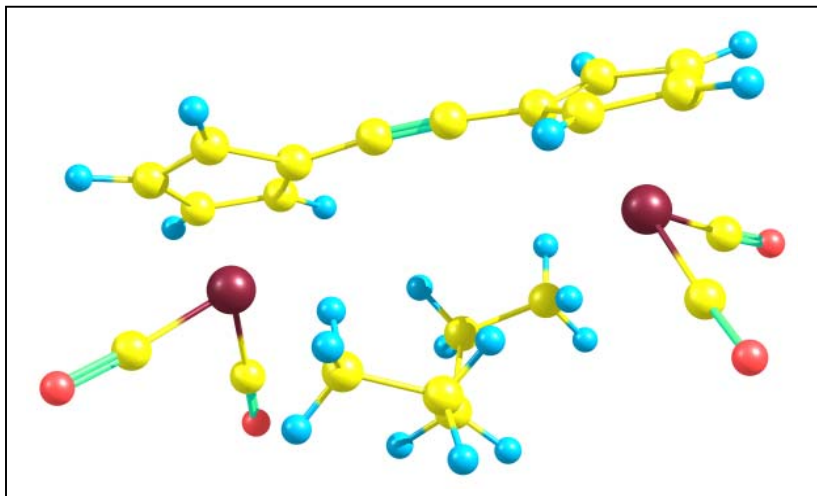

## 4-2e. Binuclear Re, SOS-MP2

Complex

|    |           |           |           |
|----|-----------|-----------|-----------|
| Re | -3.520144 | -.303747  | 1.010827  |
| C  | -4.462978 | 1.305197  | .652619   |
| C  | 4.164802  | -1.185536 | .900678   |
| C  | -4.533115 | -.567402  | 2.594654  |
| C  | -.607242  | -1.660746 | -.079698  |
| C  | -2.030714 | -1.645619 | -.173822  |
| C  | -2.786948 | -.881487  | -1.122964 |
| H  | -2.616574 | -3.244795 | 1.286909  |
| H  | -2.377441 | -.200743  | -1.859355 |
| C  | -4.171842 | -1.202085 | -.911323  |
| H  | -5.007008 | -.828554  | -1.491926 |
| C  | -4.251840 | -2.197982 | .122246   |
| H  | -5.155230 | -2.703697 | .441609   |
| C  | -2.914078 | -2.507766 | .550808   |
| C  | .608050   | -1.661914 | .046814   |
| O  | 4.939776  | 2.316515  | -.324448  |
| O  | -5.102958 | 2.240700  | .343236   |
| O  | -5.217411 | -.818605  | 3.516150  |
| Re | 3.527224  | -.313747  | -1.036625 |
| H  | 2.356851  | -.178304  | 1.817703  |
| C  | 4.634846  | -.555071  | -2.558937 |
| C  | 4.367135  | 1.345172  | -.654134  |
| H  | 5.163737  | -2.701170 | -.423866  |
| C  | 4.254988  | -2.197494 | -.116241  |
| C  | 2.924654  | -2.513442 | -.558544  |
| H  | 4.992331  | -.806120  | 1.488089  |
| H  | 2.636084  | -3.263698 | -1.284618 |
| C  | 2.030789  | -1.644110 | .150206   |
| O  | 5.377744  | -.789938  | -3.438620 |
| C  | 2.775034  | -.870880  | 1.097227  |

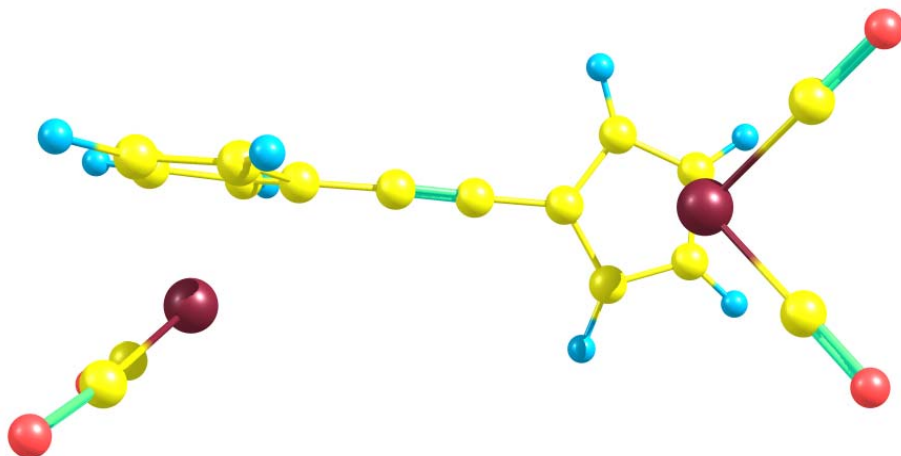



Methane:

|    |           |           |           |
|----|-----------|-----------|-----------|
| C  | -2.812108 | -1.898885 | 1.281317  |
| C  | -2.052953 | -2.145544 | .086248   |
| C  | -2.890546 | -1.942766 | -1.055948 |
| C  | -4.164975 | -1.487105 | -.569569  |
| C  | -4.116601 | -1.471877 | .863911   |
| C  | -.656717  | -2.429930 | .041745   |
| C  | .560570   | -2.309416 | -.014175  |
| C  | 1.959521  | -2.061940 | -.082676  |
| C  | 2.789656  | -1.740275 | 1.046756  |
| C  | 4.030897  | -1.246107 | .523034   |
| C  | 3.962318  | -1.265210 | -.909217  |
| C  | 2.678068  | -1.789275 | -1.290304 |
| H  | -2.459090 | -2.033493 | 2.296549  |
| H  | -4.949635 | -1.243562 | 1.518445  |
| H  | -5.043939 | -1.294733 | -1.172971 |
| H  | -2.603807 | -2.100610 | -2.088995 |
| H  | 2.319694  | -1.973466 | -2.296190 |
| H  | 4.777493  | -1.028798 | -1.582456 |
| H  | 4.902060  | -.971949  | 1.106434  |
| H  | 2.532399  | -1.898350 | 2.086978  |
| Re | 2.471881  | .227521   | -.147116  |
| C  | 2.733249  | 1.452569  | -1.570888 |
| O  | 2.970521  | 2.163624  | -2.476150 |
| C  | 3.089647  | 1.549748  | 1.058086  |
| O  | 3.564468  | 2.313543  | 1.816482  |
| Re | -2.705628 | .092431   | .073340   |
| C  | -3.299834 | 1.373959  | 1.333084  |
| O  | -3.754740 | 2.107032  | 2.133060  |
| C  | -3.157994 | 1.297535  | -1.318623 |
| O  | -3.511309 | 1.992611  | -2.198330 |
| C  | -.151821  | 1.008141  | -.207521  |
| H  | -.190310  | 1.991221  | -.670345  |
| H  | .707462   | .968014   | .535521   |
| H  | -.944109  | .939978   | .605821   |
| H  | -.167575  | .215783   | -.952164  |

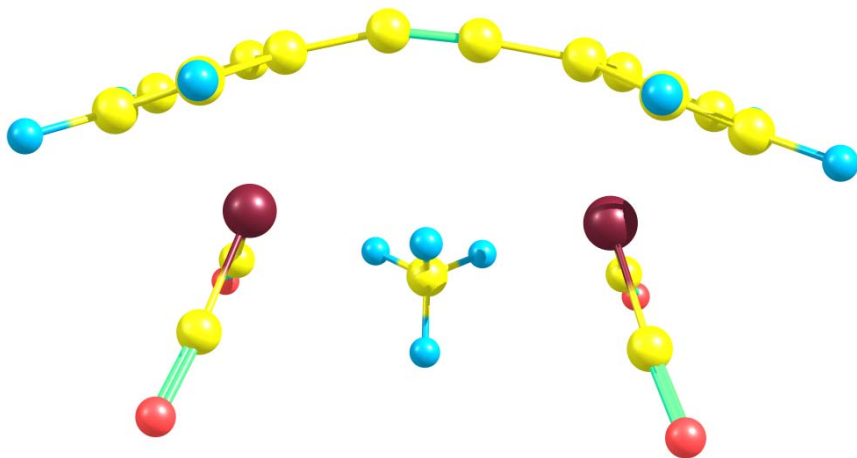

Ethane:

|    |           |           |           |
|----|-----------|-----------|-----------|
| C  | -4.175091 | 1.625487  | -1.035073 |
| C  | -2.777921 | 1.764187  | -1.345296 |
| C  | -2.079671 | 1.872021  | -.099950  |
| C  | -3.030487 | 1.885771  | .974409   |
| C  | -4.329788 | 1.706084  | .387588   |
| H  | -4.982546 | 1.571917  | -1.755526 |
| H  | -2.325504 | 1.787245  | -2.329517 |
| H  | -2.800553 | 2.023486  | 2.024280  |
| H  | -5.273571 | 1.713971  | .919939   |
| C  | -.665623  | 1.995597  | .040186   |
| C  | .544583   | 1.863375  | .156441   |
| C  | 1.953687  | 1.683993  | .274585   |
| C  | 2.867836  | 1.596386  | -.823425  |
| C  | 4.153398  | 1.250241  | -.277139  |
| C  | 4.021922  | 1.148594  | 1.146348  |
| C  | 2.656069  | 1.424932  | 1.499079  |
| H  | 2.236060  | 1.484501  | 2.495857  |
| H  | 2.631454  | 1.795783  | -1.861976 |
| H  | 5.080848  | 1.176758  | -.832325  |
| H  | 4.834315  | .977376   | 1.842755  |
| Re | 2.833832  | -.500720  | .198696   |
| C  | 3.526420  | -1.579537 | -1.196744 |
| O  | 4.022865  | -2.186978 | -2.072477 |
| C  | 3.441500  | -1.776410 | 1.457209  |
| O  | 3.893491  | -2.501432 | 2.266573  |
| Re | -3.210735 | -.177282  | -.112251  |
| C  | -3.819816 | -1.327639 | -1.486787 |
| O  | -4.260782 | -1.965546 | -2.371787 |
| C  | -4.174444 | -1.203665 | 1.154254  |
| O  | -4.836302 | -1.767467 | 1.946119  |
| C  | -.884518  | -1.413613 | .574086   |
| C  | .341284   | -1.491662 | -.341913  |
| H  | .400761   | -.617177  | -.990288  |
| H  | 1.215340  | -1.637039 | .368655   |
| H  | .343215   | -2.388553 | -.967091  |
| H  | -1.777219 | -1.554630 | -.112721  |
| H  | -.877426  | -.495188  | 1.162069  |
| H  | -.951310  | -2.260524 | 1.262935  |

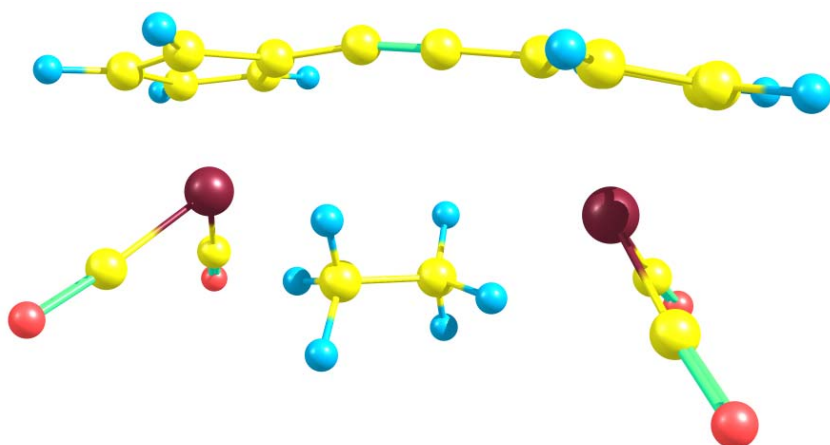

Butane:

|    |           |           |           |
|----|-----------|-----------|-----------|
| Re | .158686   | 2.943037  | -.579810  |
| C  | 1.801744  | 3.674149  | .001300   |
| C  | -2.586266 | -4.276277 | -2.740919 |
| C  | -.738918  | 3.950997  | .745285   |
| C  | -.918277  | .318336   | -2.523177 |
| C  | -.617130  | 1.708858  | -2.438360 |
| C  | .635545   | 2.315683  | -2.790621 |
| H  | -2.618137 | 2.578378  | -1.921901 |
| H  | 1.523274  | 1.790867  | -3.122300 |
| C  | .466561   | 3.734921  | -2.654146 |
| H  | 1.210115  | 4.487350  | -2.889771 |
| C  | -.886965  | 3.995487  | -2.259240 |
| H  | -1.340032 | 4.974628  | -2.160155 |
| C  | -1.572270 | 2.735630  | -2.158137 |
| C  | -1.162829 | -.879816  | -2.529202 |
| O  | -5.235654 | -4.445863 | .009860   |
| O  | 2.823555  | 4.188478  | .278446   |
| O  | -1.331396 | 4.636585  | 1.496293  |
| Re | -2.403337 | -3.478823 | -.655726  |
| H  | -3.571059 | -2.314251 | -3.287975 |
| C  | -1.708734 | -4.603067 | .696127   |
| C  | -4.150270 | -4.040463 | -.194909  |
| H  | -.840224  | -5.542582 | -2.117692 |
| C  | -1.265705 | -4.555856 | -2.257583 |
| C  | -.566785  | -3.309330 | -2.107828 |
| H  | -3.322278 | -5.016576 | -3.031288 |
| H  | .464904   | -3.169792 | -1.807658 |
| C  | -1.484548 | -2.266833 | -2.462656 |
| O  | -1.245234 | -5.365125 | 1.464308  |
| C  | -2.715383 | -2.853761 | -2.899930 |
| C  | -2.371155 | -1.225854 | .818640   |
| H  | -3.286122 | -.638146  | .955248   |
| H  | -2.748708 | -2.292232 | .904856   |
| H  | -1.950503 | -.948759  | -.149208  |
| C  | -1.369558 | -1.008604 | 1.958661  |
| H  | -1.863809 | -1.225687 | 2.914098  |
| H  | -.544991  | -1.726206 | 1.861170  |
| C  | -.817228  | .424974   | 1.979597  |
| H  | -.335054  | .618811   | 2.946165  |
| H  | -1.641242 | 1.143849  | 1.889989  |
| C  | .198046   | .669941   | .857776   |
| H  | 1.119225  | .093339   | 1.001745  |
| H  | -.202267  | .395467   | -.119433  |
| H  | .567734   | 1.738490  | .956037   |

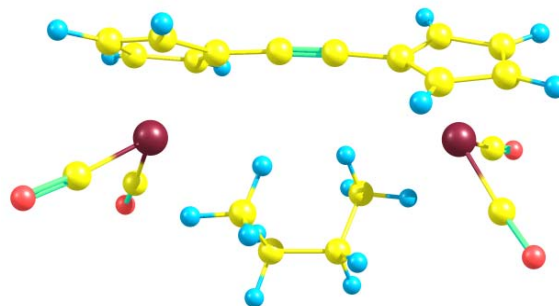

Pentane:

|    |           |           |           |
|----|-----------|-----------|-----------|
| Re | .377693   | 2.716916  | -.532237  |
| C  | 2.051230  | 3.341964  | .091739   |
| C  | -2.847119 | -4.177670 | -2.712281 |
| C  | -.477684  | 3.519308  | .952284   |
| C  | -.946738  | .335489   | -2.519239 |
| C  | -.548558  | 1.699699  | -2.405321 |
| C  | .734538   | 2.235404  | -2.785133 |
| H  | -2.449941 | 2.686328  | -1.748688 |
| H  | 1.566309  | 1.667183  | -3.183453 |
| C  | .680051   | 3.649389  | -2.556015 |
| H  | 1.474532  | 4.356409  | -2.765487 |
| C  | -.631001  | 3.987528  | -2.081051 |
| H  | -1.002301 | 4.989356  | -1.902593 |
| C  | -1.409489 | 2.779155  | -2.037756 |
| C  | -1.275527 | -.841430  | -2.533694 |
| O  | -5.251825 | -4.405273 | .308243   |
| O  | 3.093545  | 3.788520  | .406382   |
| O  | -1.051355 | 4.067926  | 1.822352  |
| Re | -2.535422 | -3.343601 | -.642104  |
| H  | -3.778751 | -2.183622 | -3.226375 |
| C  | -1.688701 | -4.281031 | .766116   |
| C  | -4.207447 | -3.970001 | -.015333  |
| H  | -1.131803 | -5.514897 | -2.149689 |
| C  | -1.523616 | -4.512575 | -2.273714 |
| C  | -.767609  | -3.293776 | -2.173190 |
| H  | -3.630055 | -4.888560 | -2.949744 |
| H  | .275996   | -3.194549 | -1.898327 |
| C  | -1.655401 | -2.213832 | -2.475410 |
| O  | -1.127223 | -4.924373 | 1.576607  |
| C  | -2.930566 | -2.754381 | -2.867645 |
| C  | -3.174175 | -1.044260 | .705949   |
| H  | -3.824101 | -.902495  | -.158626  |
| H  | -2.351144 | -1.818649 | .544476   |
| H  | -3.772196 | -1.401126 | 1.547937  |
| C  | -2.404830 | .239651   | 1.048303  |
| H  | -1.926884 | .636588   | .146035   |
| H  | -3.142265 | .990698   | 1.362857  |
| C  | -1.357621 | .046591   | 2.156908  |
| H  | -1.789360 | -.581819  | 2.948342  |
| H  | -1.133524 | 1.017181  | 2.619183  |
| C  | -.046896  | -.585091  | 1.655717  |
| H  | .487208   | -1.046786 | 2.496890  |
| H  | -.260290  | -1.393772 | .945277   |
| C  | .906753   | .434133   | 1.017274  |
| H  | .320770   | .895414   | .161345   |
| H  | 1.226633  | 1.181999  | 1.743007  |
| H  | 1.786930  | -.033917  | .569494   |

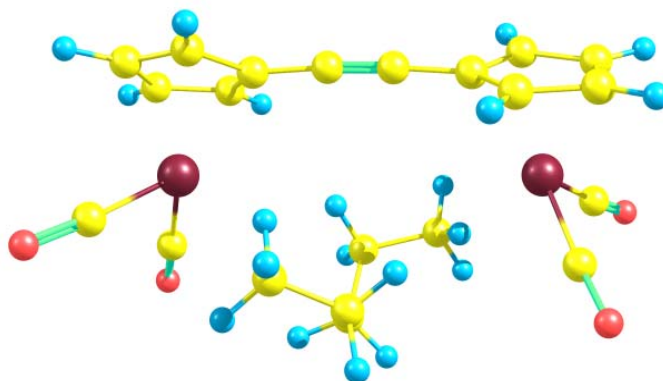

### 4-3. Monuclear manganese complex.

#### 4-3a. Mononuclear manganese, BP86.

Complex:

|    |          |           |           |
|----|----------|-----------|-----------|
| C  | 3.544063 | -0.812374 | 0.734233  |
| C  | 3.867309 | 0.126557  | -0.302586 |
| C  | 3.256161 | -0.333439 | -1.529668 |
| C  | 2.549043 | -1.535247 | -1.223245 |
| C  | 2.725969 | -1.854440 | 0.159083  |
| H  | 3.867512 | -0.749222 | 1.773523  |
| H  | 4.478970 | 1.021117  | -0.182471 |
| H  | 3.310510 | 0.153892  | -2.503316 |
| H  | 1.913035 | -2.085575 | -1.922462 |
| H  | 2.321868 | -2.722328 | 0.680260  |
| Mn | 1.798080 | 0.087318  | 0.010845  |
| C  | 1.153311 | 0.209716  | 1.659722  |
| O  | 0.804596 | 0.283726  | 2.781536  |
| C  | 1.698638 | 1.838333  | -0.262787 |
| O  | 1.730759 | 3.001674  | -0.439363 |

Methane:

|    |           |           |           |
|----|-----------|-----------|-----------|
| C  | -1.787875 | -1.220441 | -0.215533 |
| C  | -1.479336 | -0.459294 | -1.403257 |
| C  | -1.544579 | 0.933509  | -1.067899 |
| C  | -1.886687 | 1.045182  | 0.328697  |
| C  | -2.022622 | -0.284605 | 0.836508  |
| H  | -1.830192 | -2.307165 | -0.135255 |
| H  | -1.253899 | -0.868670 | -2.388854 |
| H  | -1.376288 | 1.763552  | -1.755312 |
| H  | -2.018640 | 1.969377  | 0.891437  |
| H  | -2.217954 | -0.544182 | 1.879517  |
| Mn | -0.005970 | 0.004860  | 0.027438  |
| C  | 1.026723  | 1.404080  | -0.296821 |
| O  | 1.650376  | 2.361066  | -0.585413 |
| C  | 1.135901  | -1.093027 | -0.765275 |
| O  | 1.843140  | -1.819416 | -1.364173 |
| C  | 0.891123  | -0.664936 | 2.331581  |
| H  | 1.979575  | -0.789754 | 2.421963  |
| H  | 0.434363  | -0.454786 | 3.312032  |
| H  | 0.725672  | 0.292433  | 1.740546  |
| H  | 0.448685  | -1.575780 | 1.907317  |

Cyclobutane:

|    |           |           |           |
|----|-----------|-----------|-----------|
| C  | -0.865528 | 0.224385  | -1.499949 |
| C  | -1.907661 | 0.442871  | -0.539999 |
| C  | -2.075139 | -0.771753 | 0.222919  |
| C  | -1.122703 | -1.715274 | -0.266792 |
| C  | -0.376173 | -1.121726 | -1.332989 |
| H  | -0.510426 | 0.949559  | -2.233573 |
| H  | -2.479236 | 1.363694  | -0.417887 |
| H  | -2.796033 | -0.934071 | 1.024774  |
| H  | -0.952310 | -2.714428 | 0.140656  |
| H  | 0.417902  | -1.596491 | -1.909657 |
| Mn | -0.085476 | 0.069674  | 0.456705  |
| C  | 1.334332  | 0.986820  | -0.056860 |
| O  | 2.240793  | 1.618719  | -0.467166 |
| C  | -0.472212 | 1.254721  | 1.712455  |
| O  | -0.782728 | 2.067752  | 2.506557  |
| C  | 2.156114  | -2.195164 | 3.912705  |
| C  | 1.728639  | -0.755164 | 3.491931  |
| C  | 0.980966  | -1.390497 | 2.289941  |
| C  | 1.848231  | -2.678390 | 2.462321  |
| H  | 3.185266  | -2.334979 | 4.284380  |
| H  | 2.591053  | -0.153257 | 3.156725  |
| H  | 1.131257  | -0.155686 | 4.198188  |
| H  | 1.187070  | -0.911076 | 1.267921  |
| H  | -0.081821 | -1.573135 | 2.500335  |
| H  | 2.749214  | -2.649025 | 1.825268  |
| H  | 1.350956  | -3.654650 | 2.329677  |
| H  | 1.452219  | -2.630157 | 4.643632  |

Heptane:

|    |           |           |           |
|----|-----------|-----------|-----------|
| C  | -4.909852 | -.184361  | -.213337  |
| C  | -4.403727 | -1.118045 | -1.126452 |
| C  | -3.563084 | -2.020197 | -.420834  |
| C  | -3.576162 | -1.635692 | .935215   |
| C  | -4.390748 | -.494295  | 1.072684  |
| H  | -4.639280 | -.001111  | 1.991741  |
| H  | -3.056697 | -2.133486 | 1.732115  |
| H  | -3.077020 | -2.884260 | -.829254  |
| H  | -4.629370 | -1.157860 | -2.174540 |
| H  | -5.590358 | .612958   | -.441610  |
| Mn | -2.557944 | .054739   | -.229471  |
| C  | -2.510421 | 2.004349  | .098855   |
| O  | -2.583496 | 3.100171  | .300749   |
| C  | -1.446937 | .032170   | -1.865030 |
| O  | -.886268  | -.043434  | -2.827827 |
| C  | .457419   | -.375970  | 1.559203  |
| C  | 1.660123  | .434830   | 1.076827  |
| C  | 2.887400  | -.432157  | .790483   |
| C  | 4.095855  | .371279   | .306718   |
| C  | 5.323122  | -.496049  | .021210   |
| C  | 6.532338  | .306316   | -.462764  |
| C  | 7.754300  | -.566802  | -.745825  |
| H  | -.394311  | .268024   | 1.767940  |
| H  | .158548   | -1.115195 | .820086   |
| H  | .683202   | -.911145  | 2.476576  |
| H  | 1.912137  | 1.182616  | 1.825172  |
| H  | 1.390696  | .984438   | .176701   |
| H  | 2.630627  | -1.181967 | .043831   |
| H  | 3.155870  | -.980257  | 1.691967  |
| H  | 4.351160  | 1.120904  | 1.053818  |
| H  | 3.825645  | .919395   | -.594353  |
| H  | 5.068276  | -1.245940 | -.725918  |
| H  | 5.594052  | -1.044399 | .922014   |
| H  | 6.789302  | 1.055270  | .283384   |
| H  | 6.263738  | .853667   | -1.363824 |
| H  | 8.594335  | .030335   | -1.086916 |
| H  | 8.069198  | -1.101562 | .145881   |
| H  | 7.539619  | -1.304582 | -1.513824 |

#### 4-4. Binuclear manganese complexes.

##### 4-4a. Binuclear manganese, BP86.

Complex:

|    |           |           |           |
|----|-----------|-----------|-----------|
| Mn | -3.390144 | 0.176207  | -0.141270 |
| C  | -4.687606 | -0.067091 | -1.329874 |
| C  | 4.151020  | -1.383017 | -1.042905 |
| C  | -3.761533 | 1.898419  | 0.092477  |
| C  | -0.567162 | -1.042228 | 0.240363  |
| C  | -1.871732 | -1.029946 | 0.798211  |
| C  | -2.974757 | -1.864656 | 0.374732  |
| H  | -1.764079 | 0.712280  | 2.225149  |
| H  | -2.907194 | -2.697609 | -0.324009 |
| C  | -4.151394 | -1.381243 | 1.044757  |
| H  | -5.154910 | -1.797399 | 0.948946  |
| C  | -3.782525 | -0.270665 | 1.875017  |
| H  | -4.457037 | 0.301759  | 2.512455  |
| C  | -2.365218 | -0.054053 | 1.736663  |
| C  | 0.567037  | -1.042552 | -0.237925 |
| O  | 5.589228  | -0.273763 | 2.056734  |
| O  | -5.586037 | -0.278560 | -2.058871 |
| O  | -4.016464 | 3.022116  | 0.327179  |
| Mn | 3.390536  | 0.176168  | 0.141241  |
| H  | 2.907183  | -2.697364 | 0.328077  |
| C  | 3.759837  | 1.898542  | -0.094730 |
| C  | 4.689797  | -0.064248 | 1.328406  |
| H  | 4.456335  | 0.297672  | -2.513342 |
| C  | 3.782011  | -0.273644 | -1.874707 |
| C  | 2.364803  | -0.056592 | -1.736039 |
| H  | 5.154467  | -1.799317 | -0.946932 |
| H  | 1.763653  | 0.709191  | -2.225372 |
| C  | 1.871507  | -1.031032 | -0.796000 |
| O  | 4.013209  | 3.022336  | -0.330633 |
| C  | 2.974629  | -1.865262 | -0.371695 |



Ethane:

|    |           |           |           |
|----|-----------|-----------|-----------|
| Mn | 3.062958  | -0.406678 | 0.248330  |
| C  | 4.131707  | 1.257111  | -0.488574 |
| C  | 2.915082  | 1.691443  | 0.126643  |
| C  | 1.796860  | 1.134676  | -0.613371 |
| C  | 2.374791  | 0.335070  | -1.679001 |
| C  | 3.788641  | 0.432039  | -1.624549 |
| H  | 4.491298  | -0.063552 | -2.295117 |
| H  | 5.138992  | 1.524375  | -0.167906 |
| H  | 2.828908  | 2.346427  | 0.994090  |
| H  | 1.796506  | -0.263110 | -2.385270 |
| C  | 4.544407  | -1.338253 | 0.522760  |
| O  | 5.573241  | -1.886466 | 0.686462  |
| C  | 2.739193  | -0.299963 | 1.985714  |
| O  | 2.539960  | -0.160324 | 3.137100  |
| Mn | -3.618039 | 0.170193  | 0.728798  |
| C  | -2.797793 | 2.100868  | 1.285930  |
| C  | -2.172905 | 1.643139  | 0.059315  |
| C  | -3.255602 | 1.447633  | -0.892928 |
| C  | -4.491353 | 1.797159  | -0.259385 |
| C  | -4.197151 | 2.229626  | 1.089829  |
| H  | -2.262318 | 2.269772  | 2.223467  |
| H  | -4.923457 | 2.555015  | 1.834991  |
| H  | -5.476416 | 1.772541  | -0.726357 |
| H  | -3.131971 | 1.106647  | -1.921031 |
| C  | -3.232789 | -1.214449 | -0.310167 |
| O  | -2.979861 | -2.084254 | -1.062126 |
| C  | -5.196283 | -0.496961 | 1.198527  |
| O  | -6.279922 | -0.877752 | 1.451580  |
| C  | -0.787906 | 1.469176  | -0.168837 |
| C  | 0.418025  | 1.329561  | -0.369989 |
| C  | 0.974572  | -3.212359 | -1.149358 |
| H  | -0.096856 | -3.477960 | -1.155466 |
| H  | 1.198465  | -2.705618 | -2.104210 |
| H  | 1.561894  | -4.146196 | -1.117399 |
| C  | 1.286737  | -2.310200 | 0.053105  |
| H  | 1.115672  | -2.819095 | 1.016173  |
| H  | 2.415982  | -2.124471 | 0.031472  |
| H  | 0.682613  | -1.390781 | 0.044949  |

Propane:

|    |           |           |           |
|----|-----------|-----------|-----------|
| Mn | 0.127533  | 2.813423  | -0.798245 |
| C  | 1.167907  | 3.561760  | 0.420272  |
| C  | -3.556677 | -3.713949 | -2.116343 |
| C  | -1.206391 | 3.916086  | -0.410960 |
| C  | -0.607294 | 0.186935  | -2.542237 |
| C  | 0.072605  | 1.427894  | -2.527907 |
| C  | 1.435295  | 1.644455  | -2.067991 |
| H  | -1.491559 | 2.867751  | -3.259251 |
| H  | 2.123106  | 0.863040  | -1.745850 |
| C  | 1.708840  | 3.043535  | -2.186242 |
| H  | 2.651910  | 3.530795  | -1.934678 |
| C  | 0.531313  | 3.703943  | -2.673823 |
| H  | 0.429466  | 4.771899  | -2.869216 |
| C  | -0.479001 | 2.703264  | -2.890319 |
| C  | -1.189679 | -0.896067 | -2.497401 |
| O  | -3.742831 | -4.886253 | 1.251665  |
| O  | 1.900301  | 4.103691  | 1.166929  |
| O  | -2.067009 | 4.697524  | -0.227601 |
| Mn | -2.056916 | -3.360256 | -0.624291 |
| H  | -3.984211 | -1.517151 | -1.853777 |
| C  | -0.570451 | -4.158473 | -0.078847 |
| C  | -3.054161 | -4.247256 | 0.543301  |
| H  | -2.237169 | -5.494509 | -2.561558 |
| C  | -2.345594 | -4.415943 | -2.443026 |
| C  | -1.312921 | -3.439120 | -2.643316 |
| H  | -4.520547 | -4.177529 | -1.901283 |
| H  | -0.271237 | -3.638436 | -2.895571 |
| C  | -1.872727 | -2.132817 | -2.420060 |
| O  | 0.416515  | -4.734043 | 0.204163  |
| C  | -3.279490 | -2.318305 | -2.077060 |
| C  | -1.012042 | 0.988019  | 0.708184  |
| H  | -1.648626 | 1.443858  | 1.485498  |
| H  | -0.088032 | 1.657134  | 0.647933  |
| H  | -1.585852 | 0.950425  | -0.228653 |
| C  | -0.507229 | -0.406147 | 1.114940  |
| H  | 0.239334  | -0.766384 | 0.385779  |
| H  | 0.008944  | -0.341249 | 2.091428  |
| C  | -1.645970 | -1.433535 | 1.226429  |
| H  | -2.507715 | -1.055373 | 1.804849  |
| H  | -2.077635 | -1.622988 | 0.193470  |
| H  | -1.303252 | -2.361675 | 1.705666  |

Butane:

|    |           |           |           |
|----|-----------|-----------|-----------|
| Mn | 0.185243  | 2.814620  | -0.814187 |
| C  | 1.875189  | 2.365418  | -1.092409 |
| C  | -1.640754 | -4.564820 | -2.472948 |
| C  | 0.666433  | 4.178617  | 0.208012  |
| C  | -1.030596 | 0.342548  | -2.414208 |
| C  | -1.028210 | 1.752878  | -2.277961 |
| C  | -0.149352 | 2.714469  | -2.906944 |
| H  | -2.643201 | 2.068132  | -0.725198 |
| H  | 0.628786  | 2.472605  | -3.631594 |
| C  | -0.480512 | 4.021151  | -2.423817 |
| H  | -0.007982 | 4.954738  | -2.730734 |
| C  | -1.579062 | 3.886852  | -1.496467 |
| H  | -2.053795 | 4.699341  | -0.945026 |
| C  | -1.893346 | 2.509880  | -1.383601 |
| C  | -1.080598 | -0.888570 | -2.418711 |
| O  | -5.161434 | -2.657733 | -1.541868 |
| O  | 2.992454  | 2.090957  | -1.338793 |
| O  | 0.966256  | 5.139413  | 0.818600  |
| Mn | -2.375584 | -3.363253 | -0.891025 |
| H  | -2.684926 | -3.005733 | -3.725062 |
| C  | -2.898757 | -4.727314 | 0.110577  |
| C  | -4.054315 | -2.923765 | -1.245550 |
| H  | -0.141519 | -5.256275 | -0.925319 |
| C  | -0.586530 | -4.439033 | -1.494315 |
| C  | -0.273307 | -3.063853 | -1.359033 |
| H  | -2.103145 | -5.494864 | -2.804760 |
| H  | 0.446330  | -2.627559 | -0.664392 |
| C  | -1.091970 | -2.299556 | -2.290514 |
| O  | -3.224024 | -5.688424 | 0.707452  |
| C  | -1.943571 | -3.254286 | -2.964999 |
| C  | -2.294483 | -1.419238 | 0.834055  |
| H  | -3.325498 | -1.105277 | 1.067094  |
| H  | -2.319924 | -2.561732 | 0.799285  |
| H  | -2.009791 | -0.961783 | -0.125670 |
| C  | -1.313318 | -1.036214 | 1.960143  |
| H  | -1.737392 | -1.345566 | 2.933441  |
| H  | -0.363332 | -1.593700 | 1.845089  |
| C  | -1.016539 | 0.482265  | 1.977201  |
| H  | -0.645798 | 0.779825  | 2.975637  |
| H  | -1.959873 | 1.040746  | 1.819201  |
| C  | 0.023669  | 0.879922  | 0.910515  |
| H  | 1.041379  | 0.565981  | 1.195522  |
| H  | -0.205562 | 0.430018  | -0.067756 |
| H  | 0.049581  | 2.022523  | 0.887017  |

Pentane:

|    |           |           |           |
|----|-----------|-----------|-----------|
| Mn | 0.254320  | 2.882364  | -0.651929 |
| C  | 1.743064  | 3.583640  | 0.000501  |
| C  | -2.852417 | -4.157033 | -2.671298 |
| C  | -0.749126 | 3.753930  | 0.519573  |
| C  | -0.821248 | 0.287435  | -2.291975 |
| C  | -0.431871 | 1.648716  | -2.333725 |
| C  | 0.904871  | 2.153577  | -2.579693 |
| H  | -2.383545 | 2.710714  | -1.975103 |
| H  | 1.786172  | 1.542947  | -2.774020 |
| C  | 0.828764  | 3.584640  | -2.560924 |
| H  | 1.663402  | 4.268855  | -2.719243 |
| C  | -0.525017 | 3.970824  | -2.290428 |
| H  | -0.900169 | 4.992279  | -2.223550 |
| C  | -1.312393 | 2.774408  | -2.166505 |
| C  | -1.171550 | -0.890430 | -2.276017 |
| O  | -5.516461 | -3.918589 | -0.269344 |
| O  | 2.737500  | 4.091781  | 0.372775  |
| O  | -1.435216 | 4.392017  | 1.232378  |
| Mn | -2.661479 | -3.351779 | -0.736178 |
| H  | -3.642126 | -2.102590 | -3.223075 |
| C  | -2.147874 | -4.395117 | 0.598494  |
| C  | -4.375563 | -3.673877 | -0.424044 |
| H  | -1.302665 | -5.583267 | -1.872287 |
| C  | -1.602584 | -4.558303 | -2.092595 |
| C  | -0.807949 | -3.380214 | -1.871241 |
| H  | -3.660873 | -4.825811 | -2.968455 |
| H  | 0.196864  | -3.335561 | -1.452954 |
| C  | -1.581501 | -2.246772 | -2.316461 |
| O  | -1.785466 | -5.149733 | 1.426779  |
| C  | -2.849167 | -2.725675 | -2.810592 |
| C  | -3.083697 | -1.212698 | 0.870714  |
| H  | -3.883711 | -0.916691 | 0.176585  |
| H  | -2.291524 | -1.830690 | 0.332252  |
| H  | -3.515121 | -1.837584 | 1.667270  |
| C  | -2.346944 | 0.011734  | 1.452719  |
| H  | -2.101182 | 0.720776  | 0.640063  |
| H  | -3.064392 | 0.538047  | 2.111000  |
| C  | -1.070141 | -0.340347 | 2.246780  |
| H  | -1.254220 | -1.251438 | 2.848990  |
| H  | -0.851643 | 0.466572  | 2.973484  |
| C  | 0.170993  | -0.547859 | 1.351192  |
| H  | 0.931991  | -1.139227 | 1.896475  |
| H  | -0.097497 | -1.144333 | 0.458180  |
| C  | 0.849113  | 0.767673  | 0.919932  |
| H  | 0.031588  | 1.413378  | 0.452665  |
| H  | 1.235814  | 1.323741  | 1.788428  |
| H  | 1.672651  | 0.590911  | 0.214023  |

References:

1. Kong, J., White, C. A., Krylov, A. I., Sherrill, C. D., Adamson, R. D., Furlani, T. R., Lee, M. S., Lee, A. M., Gwaltney, S. R., Adams, T. R., et. al. (2000) *J. Comp. Chem.* **21**, 1532-1548.
2. Shao, Y., Fusti-Molnar, L., Jung, Y., Kussmann, J., Ochsenfeld, C., Brown, S. T., Gilbert, A. T. B., Slipchenko, L. V., Levchenko, S. V., O'Neill, D. P *et al.* (2006) *Phys. Chem. Chem. Phys.* **8**, 3172-3191.
3. Hariharan, P. C., Pople, J. A. (1973) *Theor. Chim. Acta.* **28**, 213-222.
4. Hay, P. J., Wadt, W. R. (1985) *J. Chem. Phys.* **82**, 299-310.
5. Weigend, F., Haser, M., Patzelt, H., Ahlrichs, R. (1998) *Chem. Phys. Lett.* **294**, 143-152.
6. Boys, S. F., Bernardi, F. (1970) *Mol. Phys.* **19**, 553-566.
7. Frenking, G., Antes, I., Böhme, M., Dapprich, S., Ehlers, A. W., Jonas, V., Neuhaus, A., Otto, M., Stegmann, R., Veldkamp, A., Vyboishchikov, S. F. (1996) in *Reviews in Computational Chemistry*, eds. Lipkowitz, K. B. & Boyd, D. B (VCH), Vol. 8, pp 63-144.
