# Supplementary material
Source: PubMed Central journal article supplement (PMC1855367)

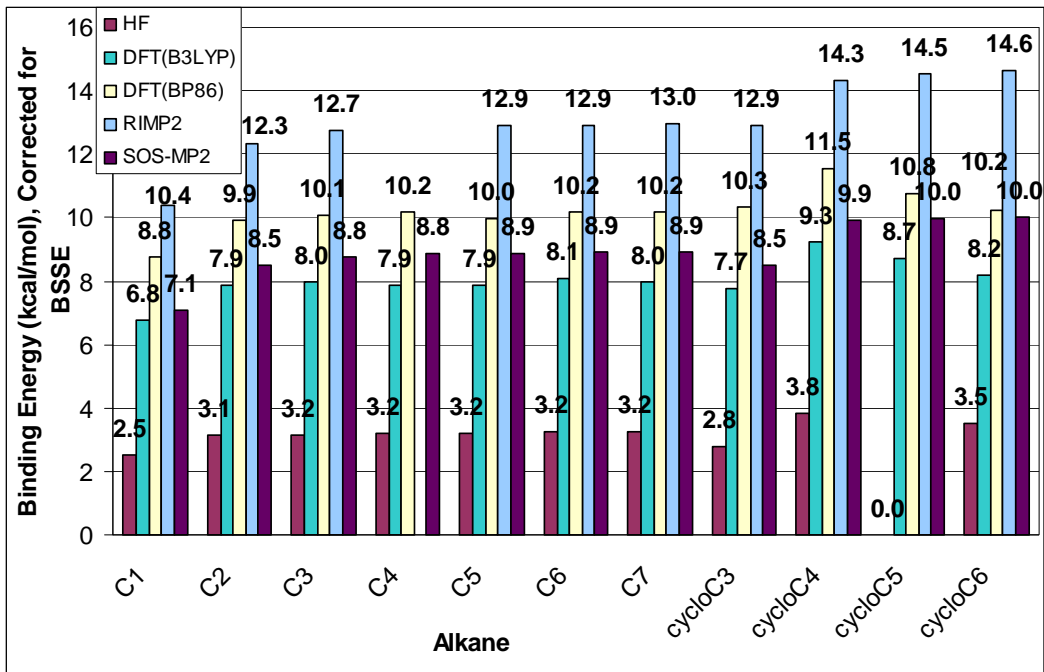

Supplement: pnas_0610295104_1.pdf [file pnas_0610295104_1.pdf]

Binding Energy (kcal/mol), Uncorrected for BSSE

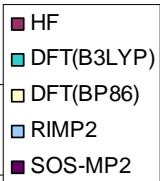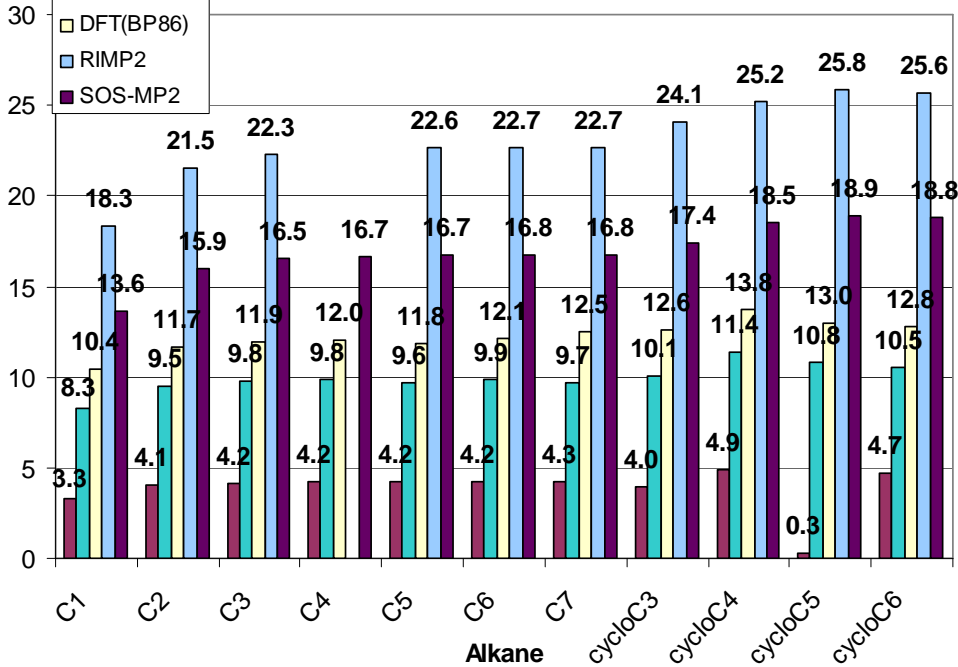

Supplement: pnas_0610295104_2.pdf [file pnas_0610295104_2.pdf]

Binding Energy (kcal/mol), Corrected for BSSE

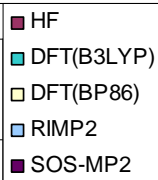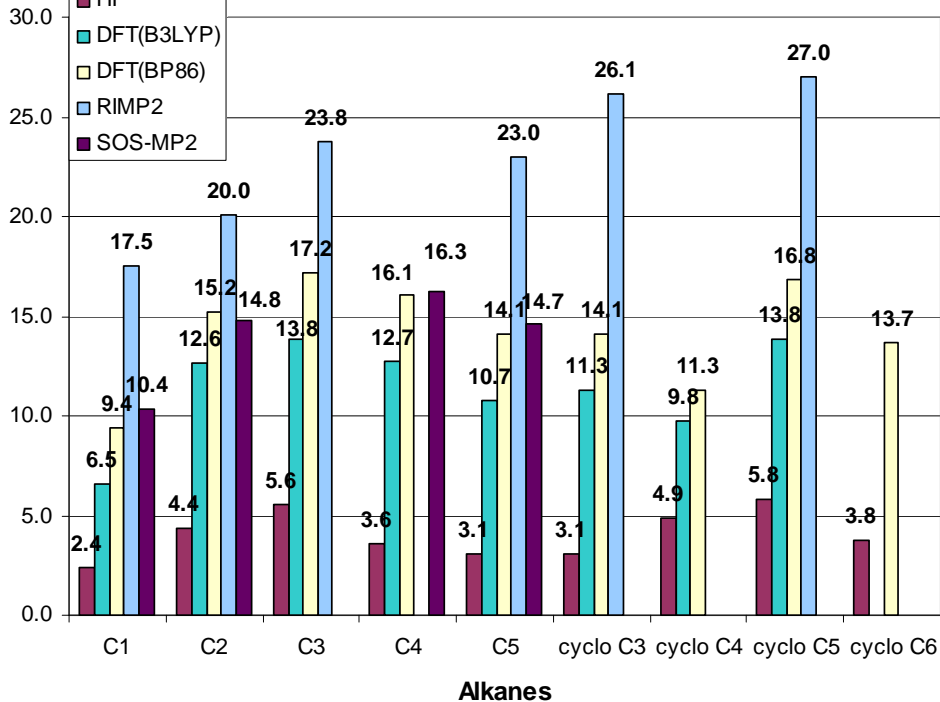

Supplement: pnas_0610295104_3.pdf [file pnas_0610295104_3.pdf]

**Binding Energy (kcal/mol), Uncorrected for BSSE**

60.0  
50.0  
40.0  
30.0  
20.0  
10.0  
0.0

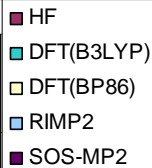

C1 C2 C3 C4 C5 cyclo C3 cyclo C4 cyclo C5 cyclo C6

**Alkanes**

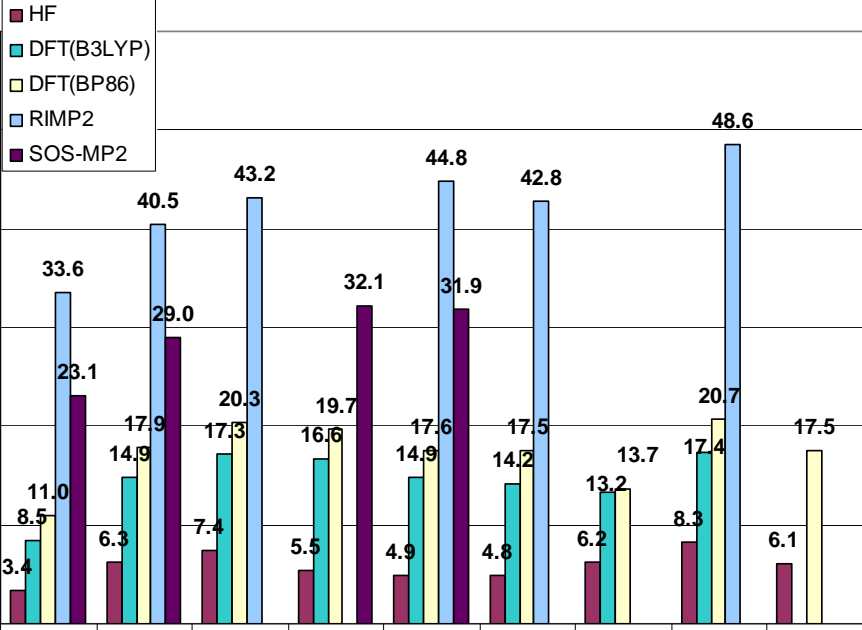

Supplement: pnas_0610295104_4.pdf [file pnas_0610295104_4.pdf]
